# Supplementary material for: Cunlanceloic acids A–D: unprecedented labdane diterpenoid dimers with AChE inhibitory and cytotoxic activities from Cunninghamia lanceolata
Source: Royal Society of Chemistry journal article supplement (doi:10.1039/d1qo00999k), 2021-01-01

## Supporting Information

### **Cunlanceloic acids A-D: unprecedented labdane diterpenoid dimers with AChE inhibitory and cytotoxic activities from *Cunninghamia lanceolata***

Xing-De Wu,<sup>a</sup> Lin-Fen Ding,<sup>a, b</sup> Bin Chen,<sup>b</sup> Xiao-Nian Li,<sup>a</sup> Li-Yan Peng,<sup>a</sup> and Qin-Shi Zhao<sup>\*,a</sup>

<sup>a</sup>State Key Laboratory of Phytochemistry and Plant Resources in West China, Kunming Institute of Botany, Chinese Academy of Sciences, Kunming 650201, People's Republic of China

<sup>b</sup>School of Pharmaceutical Science & Yunnan Key Laboratory of Pharmacology for Natural Products, Kunming Medical University, Kunming 650500, People's Republic of China

\*E-mail: qinshizhao@mail.kib.ac.cn

## Contents

|                                                                                                                                        |     |
|----------------------------------------------------------------------------------------------------------------------------------------|-----|
| X-ray Crystallographic analysis of compounds <b>1-3</b> .....                                                                          | S4  |
| Table S1. Crystallographic data of compound <b>1</b> .....                                                                             | S5  |
| Table S2. Crystallographic data of compound <b>2</b> .....                                                                             | S6  |
| Table S3. Crystallographic data of compound <b>3</b> .....                                                                             | S7  |
| Figure S1. <sup>1</sup> H NMR (800 MHz) spectrum of cunlanceloic acid A ( <b>1</b> ) in pyridine- <i>d</i> <sub>5</sub> .....          | S8  |
| Figure S2. Expanded <sup>1</sup> H NMR spectrum of cunlanceloic acid A ( <b>1</b> ) .....                                              | S9  |
| Figure S3. <sup>13</sup> C NMR and DEPT (200 MHz) spectra of cunlanceloic acid A ( <b>1</b> ) in pyridine- <i>d</i> <sub>5</sub> ..... | S10 |
| Figure S4. HSQC spectrum of cunlanceloic acid A ( <b>1</b> ) .....                                                                     | S11 |
| Figure S5. Expanded HSQC spectrum of cunlanceloic acid A ( <b>1</b> ) .....                                                            | S12 |
| Figure S6. <sup>1</sup> H- <sup>1</sup> H COSY spectrum of cunlanceloic acid A ( <b>1</b> ) .....                                      | S13 |
| Figure S7. Expanded <sup>1</sup> H- <sup>1</sup> H COSY spectrum of cunlanceloic acid A ( <b>1</b> ) .....                             | S14 |
| Figure S8. HMBC spectrum of cunlanceloic acid A ( <b>1</b> ) .....                                                                     | S15 |
| Figure S9. Expanded HMBC spectrum of cunlanceloic acid A ( <b>1</b> ) .....                                                            | S16 |
| Figure S10. ROESY spectrum of cunlanceloic acid A ( <b>1</b> ) .....                                                                   | S17 |
| Figure S11. Expanded ROESY spectrum of cunlanceloic acid A ( <b>1</b> ) .....                                                          | S18 |
| Figure S12. ESIMS spectrum of cunlanceloic acid A ( <b>1</b> ) .....                                                                   | S19 |
| Figure S13. HRESIMS spectrum of cunlanceloic acid A ( <b>1</b> ) .....                                                                 | S20 |
| Figure S14. IR spectrum of cunlanceloic acid A ( <b>1</b> ) .....                                                                      | S21 |
| Figure S15. <sup>1</sup> H NMR (800 MHz) spectrum of cunlanceloic acid B ( <b>2</b> ) in pyridine- <i>d</i> <sub>5</sub> .....         | S22 |
| Figure S16. Expanded <sup>1</sup> H NMR spectrum of cunlanceloic acid B ( <b>2</b> ) .....                                             | S23 |
| Figure S17. <sup>13</sup> C NMR and DEPT (200 MHz) spectra of cunlanceloic acid B ( <b>2</b> ) in pyridine- <i>d</i> <sub>5</sub> ..   | S24 |
| Figure S18. HSQC spectrum of cunlanceloic acid B ( <b>2</b> ) .....                                                                    | S25 |
| Figure S19. Expanded HSQC spectrum of cunlanceloic acid B ( <b>2</b> ) .....                                                           | S26 |
| Figure S20. <sup>1</sup> H- <sup>1</sup> H COSY spectrum of cunlanceloic acid B ( <b>2</b> ) .....                                     | S27 |
| Figure S21. Expanded <sup>1</sup> H- <sup>1</sup> H COSY spectrum of cunlanceloic acid B ( <b>2</b> ) .....                            | S28 |
| Figure S22. HMBC spectrum of cunlanceloic acid B ( <b>2</b> ) .....                                                                    | S29 |
| Figure S23. Expanded HMBC spectrum of cunlanceloic acid B ( <b>2</b> ) .....                                                           | S30 |
| Figure S24. ROESY spectrum of cunlanceloic acid B ( <b>2</b> ) .....                                                                   | S31 |
| Figure S25. Expanded ROESY spectrum of cunlanceloic acid B ( <b>2</b> ) .....                                                          | S32 |
| Figure S26. ESIMS spectrum of cunlanceloic acid B ( <b>2</b> ) .....                                                                   | S33 |
| Figure S27. HRESIMS spectrum of cunlanceloic acid B ( <b>2</b> ) .....                                                                 | S34 |
| Figure S28. IR spectrum of cunlanceloic acid B ( <b>2</b> ) .....                                                                      | S35 |
| Figure S29. <sup>1</sup> H NMR (800 MHz) spectrum of cunlanceloic acid C ( <b>3</b> ) in pyridine- <i>d</i> <sub>5</sub> .....         | S36 |
| Figure S30. Expanded <sup>1</sup> H NMR spectrum of cunlanceloic acid C ( <b>3</b> ) .....                                             | S37 |
| Figure S31. <sup>13</sup> C NMR and DEPT (200 MHz) spectra of cunlanceloic acid C ( <b>3</b> ) in pyridine- <i>d</i> <sub>5</sub> ..   | S38 |
| Figure S32. HSQC spectrum of cunlanceloic acid C ( <b>3</b> ) .....                                                                    | S39 |
| Figure S33. Expanded HSQC spectrum of cunlanceloic acid C ( <b>3</b> ) .....                                                           | S40 |

|                                                                                                                  |     |
|------------------------------------------------------------------------------------------------------------------|-----|
| Figure S34. $^1\text{H}$ - $^1\text{H}$ COSY spectrum of cunlanceloic acid C (3) .....                           | S41 |
| Figure S35. Expanded $^1\text{H}$ - $^1\text{H}$ COSY spectrum of cunlanceloic acid C (3) .....                  | S42 |
| Figure S36. HMBC spectrum of cunlanceloic acid C (3) .....                                                       | S43 |
| Figure S37. Expanded HMBC spectrum of cunlanceloic acid C (3) .....                                              | S44 |
| Figure S38. ROESY spectrum of cunlanceloic acid C (3) .....                                                      | S45 |
| Figure S39. Expanded ROESY spectrum of cunlanceloic acid C (3) .....                                             | S46 |
| Figure S40. ESIMS spectrum of cunlanceloic acid C (3) .....                                                      | S47 |
| Figure S41. HRESIMS spectrum of cunlanceloic acid C (3) .....                                                    | S48 |
| Figure S42. IR spectrum of cunlanceloic acid C (3) .....                                                         | S49 |
| Figure S43. $^1\text{H}$ NMR (800 MHz) spectrum of cunlanceloic acid D (4) in pyridine- $d_5$ .....              | S50 |
| Figure S44. Expanded $^1\text{H}$ NMR spectrum of cunlanceloic acid D (4) .....                                  | S51 |
| Figure S45. $^{13}\text{C}$ NMR and DEPT (200 MHz) spectra of cunlanceloic acid D (4) in pyridine- $d_5$ . ..... | S52 |
| Figure S46. HSQC spectrum of cunlanceloic acid D (4) .....                                                       | S53 |
| Figure S47. Expanded HSQC spectrum of cunlanceloic acid D (4) .....                                              | S54 |
| Figure S48. $^1\text{H}$ - $^1\text{H}$ COSY spectrum of cunlanceloic acid D (4) .....                           | S55 |
| Figure S49. Expanded $^1\text{H}$ - $^1\text{H}$ COSY spectrum of cunlanceloic acid D (4) .....                  | S56 |
| Figure S50. HMBC spectrum of cunlanceloic acid D (4) .....                                                       | S57 |
| Figure S51. Expanded HMBC spectrum of cunlanceloic acid D (4) .....                                              | S58 |
| Figure S52. ROESY spectrum of cunlanceloic acid D (4) .....                                                      | S59 |
| Figure S53. Expanded ROESY spectrum of cunlanceloic acid D (4) .....                                             | S60 |
| Figure S54. ESIMS spectrum of cunlanceloic acid D (4) .....                                                      | S61 |
| Figure S55. HRESIMS spectrum of cunlanceloic acid D (4) .....                                                    | S62 |
| Figure S56. IR spectrum of cunlanceloic acid D (4) .....                                                         | S63 |

### **X-ray Crystallographic Analysis of Compounds 1-3**

Crystals of **1-3** were obtained by using the solvent vapor diffusion in methanol at room temperature. Crystallographic data for **1-3** were collected on a Bruker APEX DUO diffractometer with graphite monochromator Cu K $\alpha$  radiation. Crystal structures were solved by direct methods with SHELXS-97, expanded using difference Fourier technique, and refined with full-matrix least-squares on  $F^2$  using SHELXS-97. Non-hydrogen atoms were refined anisotropically. Hydrogen atoms were placed in idealized positions and refined using a riding model. Crystallographic data for compounds **1-3** have been deposited in the Cambridge Crystallographic Data Centre (deposition numbers: CCDC 2051450, 2051451, and 2051453, respectively). Copies of these data can be obtained free of charge via [www.ccdc.cam.ac.uk](http://www.ccdc.cam.ac.uk) (or from the Cambridge Crystallographic Data Centre, 12, Union Road, CAMBRIDGE CB2 1EZ, UK.; fax: (+44) 1223-336-033; or [deposit@ccdc.cam.ac.uk](mailto:deposit@ccdc.cam.ac.uk)).

**Table S1.** Crystallographic data of compound **1**.

---

|                                   |                                                                                        |
|-----------------------------------|----------------------------------------------------------------------------------------|
| Identification code               | cu_fwf202_2_0m                                                                         |
| Empirical formula                 | 1/2(C <sub>40</sub> H <sub>56</sub> O <sub>6</sub> )                                   |
| Formula weight                    | 316.42                                                                                 |
| Temperature                       | 100(2) K                                                                               |
| Wavelength                        | 1.54178 Å                                                                              |
| Crystal system                    | Orthorhombic                                                                           |
| Space group                       | C222 <sub>1</sub>                                                                      |
| Unit cell dimensions              | a = 8.8961(3) Å   a = 90°<br>b = 10.7470(4) Å   b = 90°<br>c = 36.9444(14) Å   g = 90° |
| Volume                            | 3532.1(2) Å <sup>3</sup>                                                               |
| Z                                 | 8                                                                                      |
| Calculated density                | 1.190 Mg/m <sup>3</sup>                                                                |
| Absorption coefficient            | 0.618 mm <sup>-1</sup>                                                                 |
| F(000)                            | 1376                                                                                   |
| Crystal size                      | 0.585 x 0.570 x 0.230 mm <sup>3</sup>                                                  |
| Theta range for data collection   | 4.788 to 69.086°                                                                       |
| Indices ranges                    | -9 ≤ h ≤ 10, -12 ≤ k ≤ 11, -42 ≤ l ≤ 38                                                |
| Reflections collected             | 10155                                                                                  |
| Independent reflections           | 3084 [R(int) = 0.0253]                                                                 |
| Completeness to theta = 67.679°   | 97.2 %                                                                                 |
| Absorption correction             | Semi-empirical from equivalents                                                        |
| Refinement method                 | Full-matrix least-squares on F <sup>2</sup>                                            |
| Data/restraints/parameters        | 3084/0/211                                                                             |
| Goodness-of-fit on F <sup>2</sup> | 1.047                                                                                  |
| Final R indices [I > 2σ(I)]       | R <sub>1</sub> = 0.0310, wR <sub>2</sub> = 0.0776                                      |
| R indices (all data)              | R <sub>1</sub> = 0.0314, wR <sub>2</sub> = 0.0779                                      |
| Absolute structure parameter      | 0.08(5)                                                                                |
| Largest diff. peak and hole       | 0.168 and -0.196 e.Å <sup>-3</sup>                                                     |

---

**Table S2.** Crystallographic data of compound **2**.

---

|                                   |                                                                                                                                                                    |
|-----------------------------------|--------------------------------------------------------------------------------------------------------------------------------------------------------------------|
| Identification code               | cu_fwf200_0m                                                                                                                                                       |
| Empirical formula                 | 2(C <sub>40</sub> H <sub>60</sub> O <sub>3</sub> )•H <sub>2</sub> O                                                                                                |
| Formula weight                    | 1195.77                                                                                                                                                            |
| Temperature                       | 100(2) K                                                                                                                                                           |
| Wavelength                        | 1.54178 Å                                                                                                                                                          |
| Crystal system                    | Monoclinic                                                                                                                                                         |
| Space group                       | P2 <sub>1</sub>                                                                                                                                                    |
| Unit cell dimensions              | $a = 17.6987(3) \text{ \AA}$ $\alpha = 90^\circ$<br>$b = 7.57510(10) \text{ \AA}$ $\beta = 105.9950(10)^\circ$<br>$c = 27.9558(5) \text{ \AA}$ $\gamma = 90^\circ$ |
| Volume                            | 3602.92(10) Å <sup>3</sup>                                                                                                                                         |
| Z                                 | 2                                                                                                                                                                  |
| Calculated density                | 1.102 Mg/m <sup>3</sup>                                                                                                                                            |
| Absorption coefficient            | 0.522 mm <sup>-1</sup>                                                                                                                                             |
| F(000)                            | 1316                                                                                                                                                               |
| Crystal size                      | 1.120 x 0.160 x 0.070 mm <sup>3</sup>                                                                                                                              |
| Theta range for data collection   | 2.597 to 69.625°                                                                                                                                                   |
| Indices ranges                    | -20 ≤ h ≤ 20, -8 ≤ k ≤ 7, -33 ≤ l ≤ 32                                                                                                                             |
| Reflections collected             | 34015                                                                                                                                                              |
| Independent reflections           | 10348 [R(int) = 0.0533]                                                                                                                                            |
| Completeness to theta = 67.679°   | 95.3 %                                                                                                                                                             |
| Absorption correction             | Semi-empirical from equivalents                                                                                                                                    |
| Refinement method                 | Full-matrix least-squares on F <sup>2</sup>                                                                                                                        |
| Data/restraints/parameters        | 10348 / 1 / 798                                                                                                                                                    |
| Goodness-of-fit on F <sup>2</sup> | 1.109                                                                                                                                                              |
| Final R indices [I > 2σ(I)]       | R <sub>1</sub> = 0.0591, wR <sub>2</sub> = 0.1822                                                                                                                  |
| R indices (all data)              | R <sub>1</sub> = 0.0636, wR <sub>2</sub> = 0.1928                                                                                                                  |
| Absolute structure parameter      | 0.04(11)                                                                                                                                                           |
| Largest diff. peak and hole       | 0.325 and -0.356 e.Å <sup>-3</sup>                                                                                                                                 |

---

**Table S3.** Crystallographic data of compound **3**.

---

|                                        |                                                                                                                                                                              |
|----------------------------------------|------------------------------------------------------------------------------------------------------------------------------------------------------------------------------|
| Identification code                    | cu_fwfl99a_0m                                                                                                                                                                |
| Empirical formula                      | $3(\text{C}_{40}\text{H}_{60}\text{O}_3) \cdot 2(\text{H}_2\text{O})$                                                                                                        |
| Formula weight                         | 1802.66                                                                                                                                                                      |
| Temperature                            | 100(2) K                                                                                                                                                                     |
| Wavelength                             | 1.54178 Å                                                                                                                                                                    |
| Crystal system                         | Triclinic                                                                                                                                                                    |
| Space group                            | P1                                                                                                                                                                           |
| Unit cell dimensions                   | $a = 7.3306(3) \text{ \AA}$ $\alpha = 79.290(2)^\circ$<br>$b = 13.0551(5) \text{ \AA}$ $\beta = 89.420(2)^\circ$<br>$c = 29.0818(10) \text{ \AA}$ $\gamma = 75.423(2)^\circ$ |
| Volume                                 | $2644.70(18) \text{ \AA}^3$                                                                                                                                                  |
| Z                                      | 1                                                                                                                                                                            |
| Calculated density                     | $1.132 \text{ Mg/m}^3$                                                                                                                                                       |
| Absorption coefficient                 | $0.539 \text{ mm}^{-1}$                                                                                                                                                      |
| F(000)                                 | 992                                                                                                                                                                          |
| Crystal size                           | $0.880 \times 0.250 \times 0.030 \text{ mm}^3$                                                                                                                               |
| Theta range for data collection        | $3.095$ to $69.052^\circ$                                                                                                                                                    |
| Indices ranges                         | $-8 \leq h \leq 8$ , $-14 \leq k \leq 15$ , $-34 \leq l \leq 35$                                                                                                             |
| Reflections collected                  | 36317                                                                                                                                                                        |
| Independent reflections                | 14387 [R(int) = 0.0526]                                                                                                                                                      |
| Completeness to theta = $67.679^\circ$ | 93.6 %                                                                                                                                                                       |
| Absorption correction                  | Semi-empirical from equivalents                                                                                                                                              |
| Refinement method                      | Full-matrix least-squares on F <sup>2</sup>                                                                                                                                  |
| Data/restraints/parameters             | 14387 / 3 / 1200                                                                                                                                                             |
| Goodness-of-fit on F <sup>2</sup>      | 1.028                                                                                                                                                                        |
| Final R indices [ $I > 2\sigma(I)$ ]   | $R_1 = 0.0724$ , $wR_2 = 0.1806$                                                                                                                                             |
| R indices (all data)                   | $R_1 = 0.0808$ , $wR_2 = 0.1883$                                                                                                                                             |
| Absolute structure parameter           | -0.04(16)                                                                                                                                                                    |
| Largest diff. peak and hole            | 0.690 and $-0.427 \text{ e. \AA}^{-3}$                                                                                                                                       |

---

**Figure S1.**  $^1\text{H}$  NMR (800 MHz) spectrum of cunlanceloic acid A (**1**) in pyridine- $d_5$ .

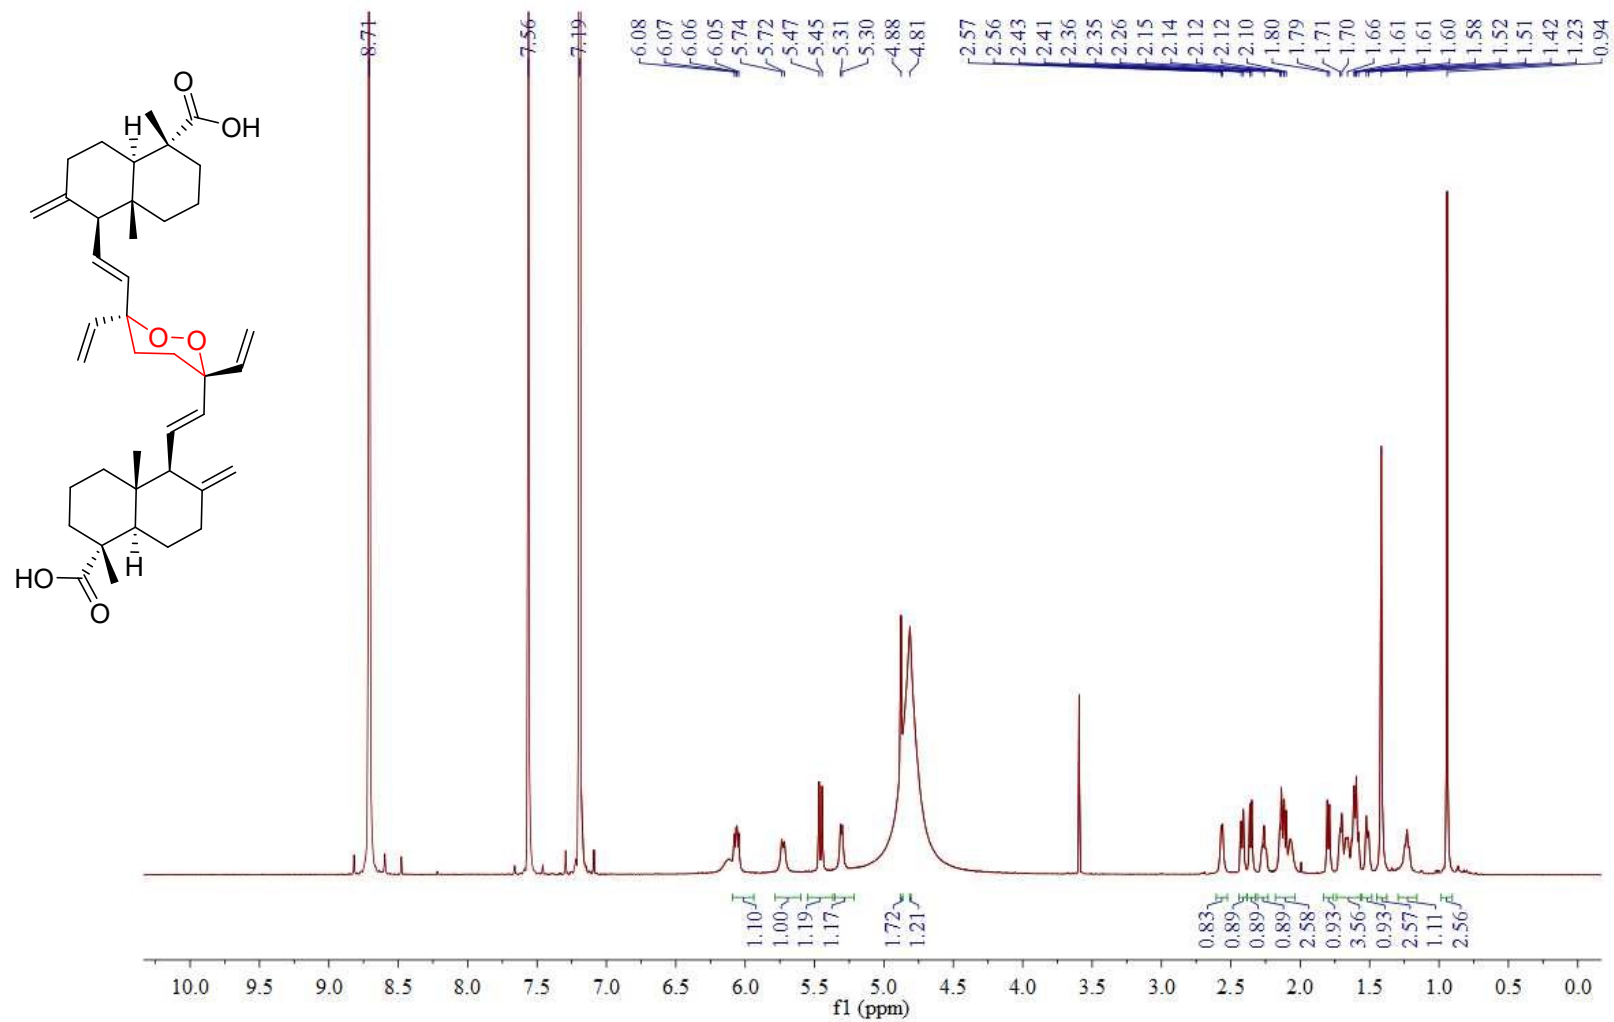



Figure S2. Expanded  $^1\text{H}$  NMR spectrum of cunlanceloic acid A (1).

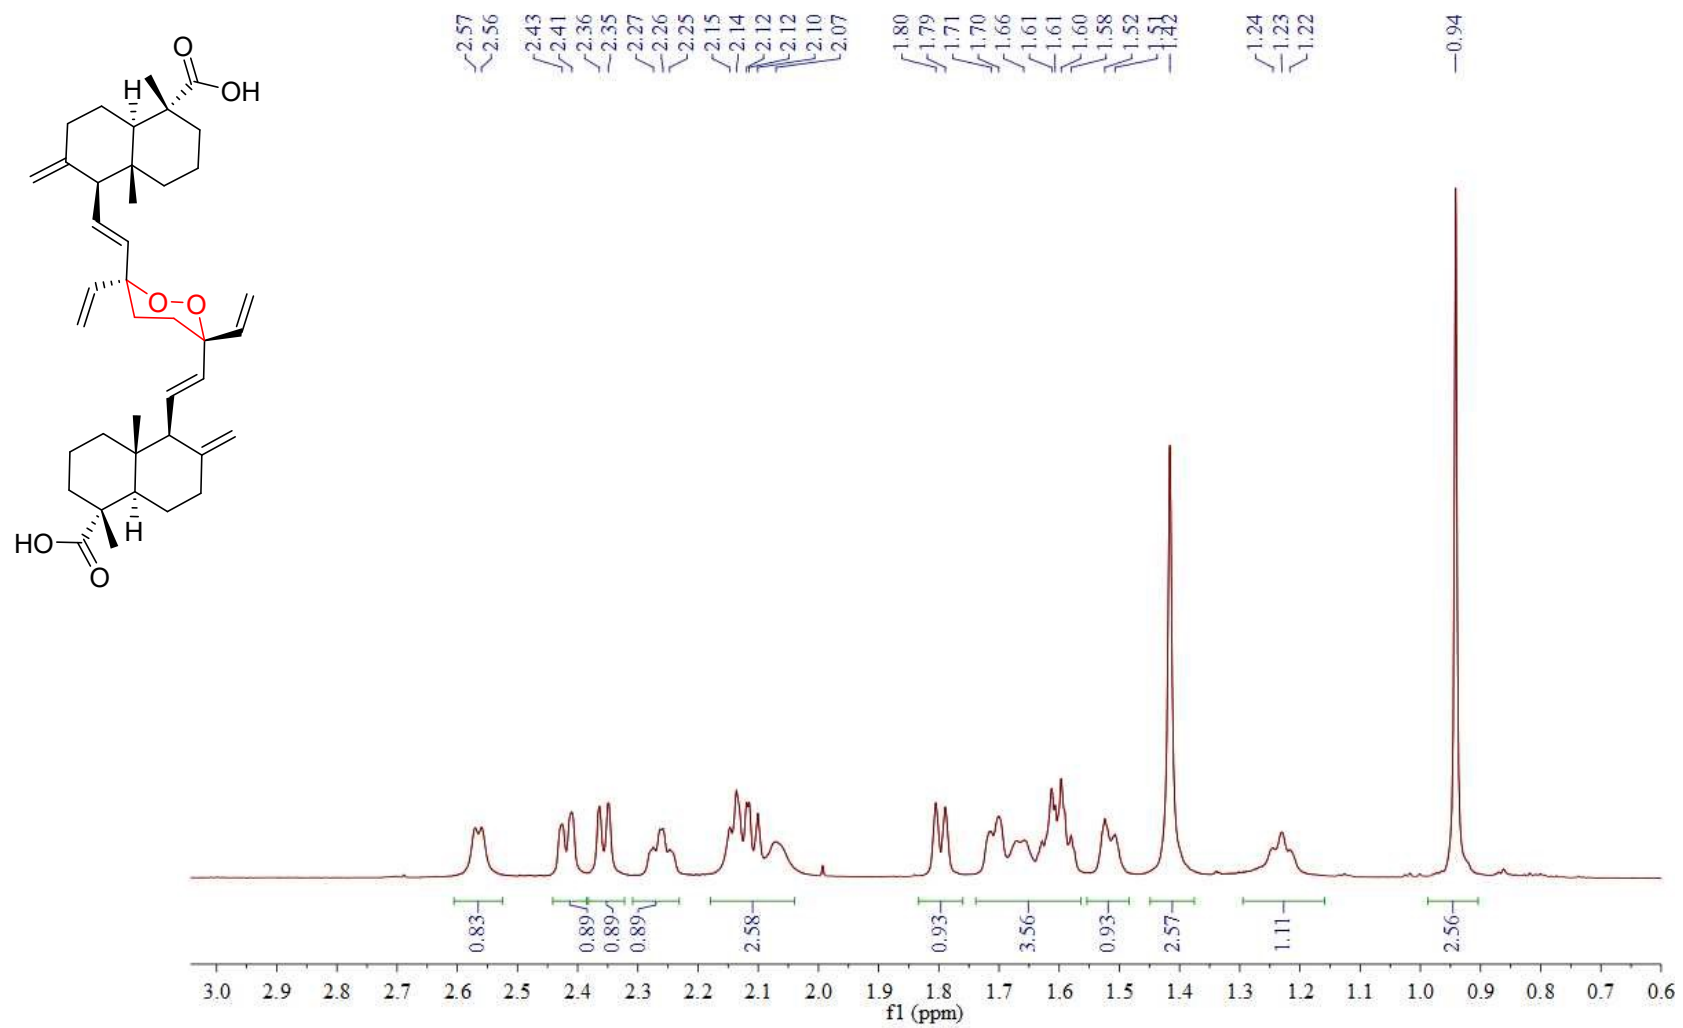

**Figure S3.**  $^{13}\text{C}$  NMR and DEPT (200 MHz) spectra of cunlanceloic acid A (**1**) in pyridine- $d_5$ .

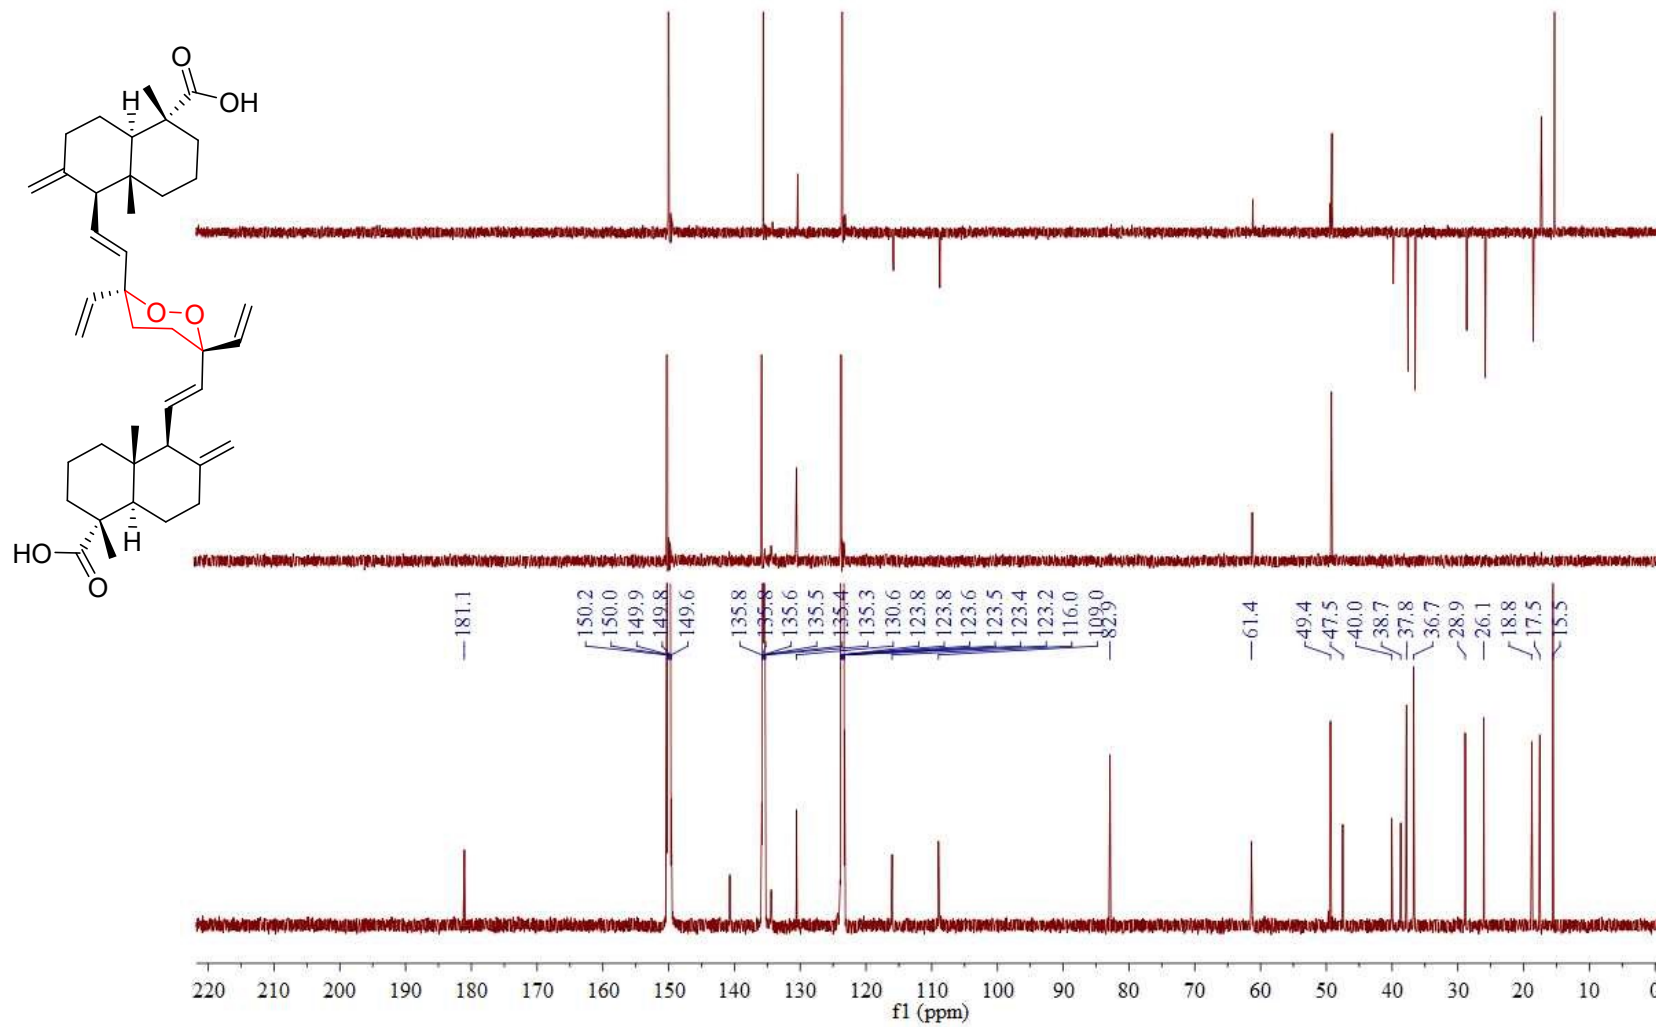

**Figure S4.** HSQC spectrum of cunlanceloic acid A (**1**).

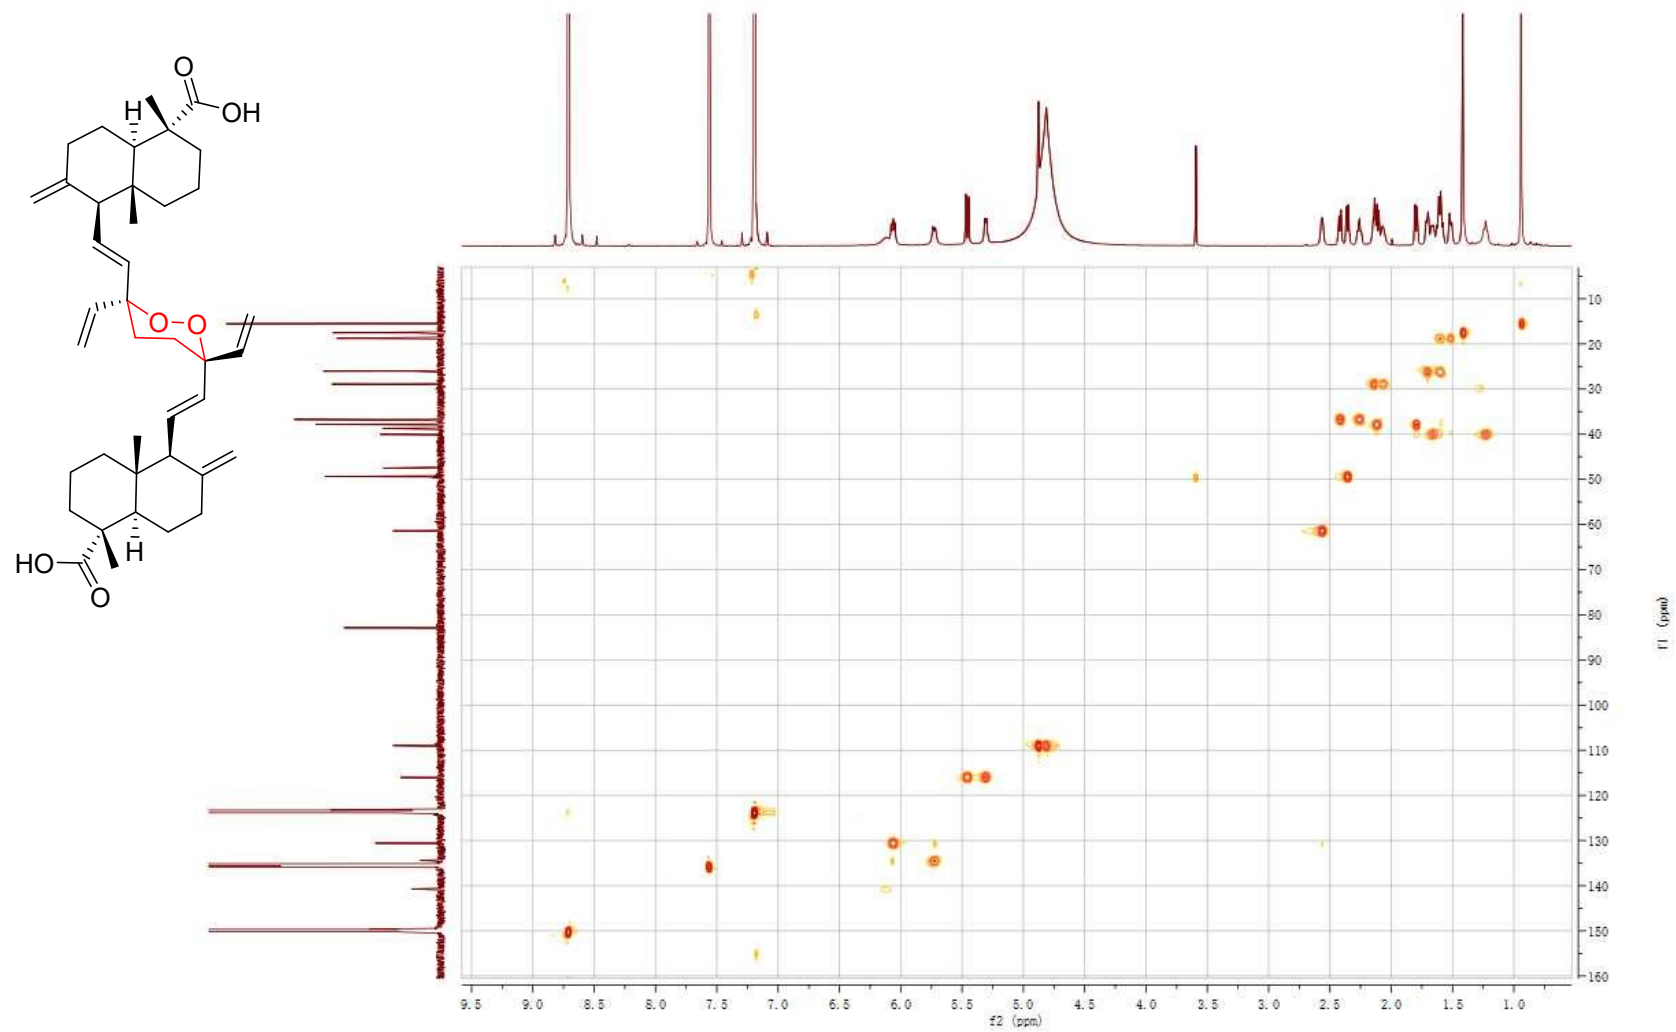

**Figure S5.** Expanded HSQC spectrum of cunlanceloic acid A (**1**).

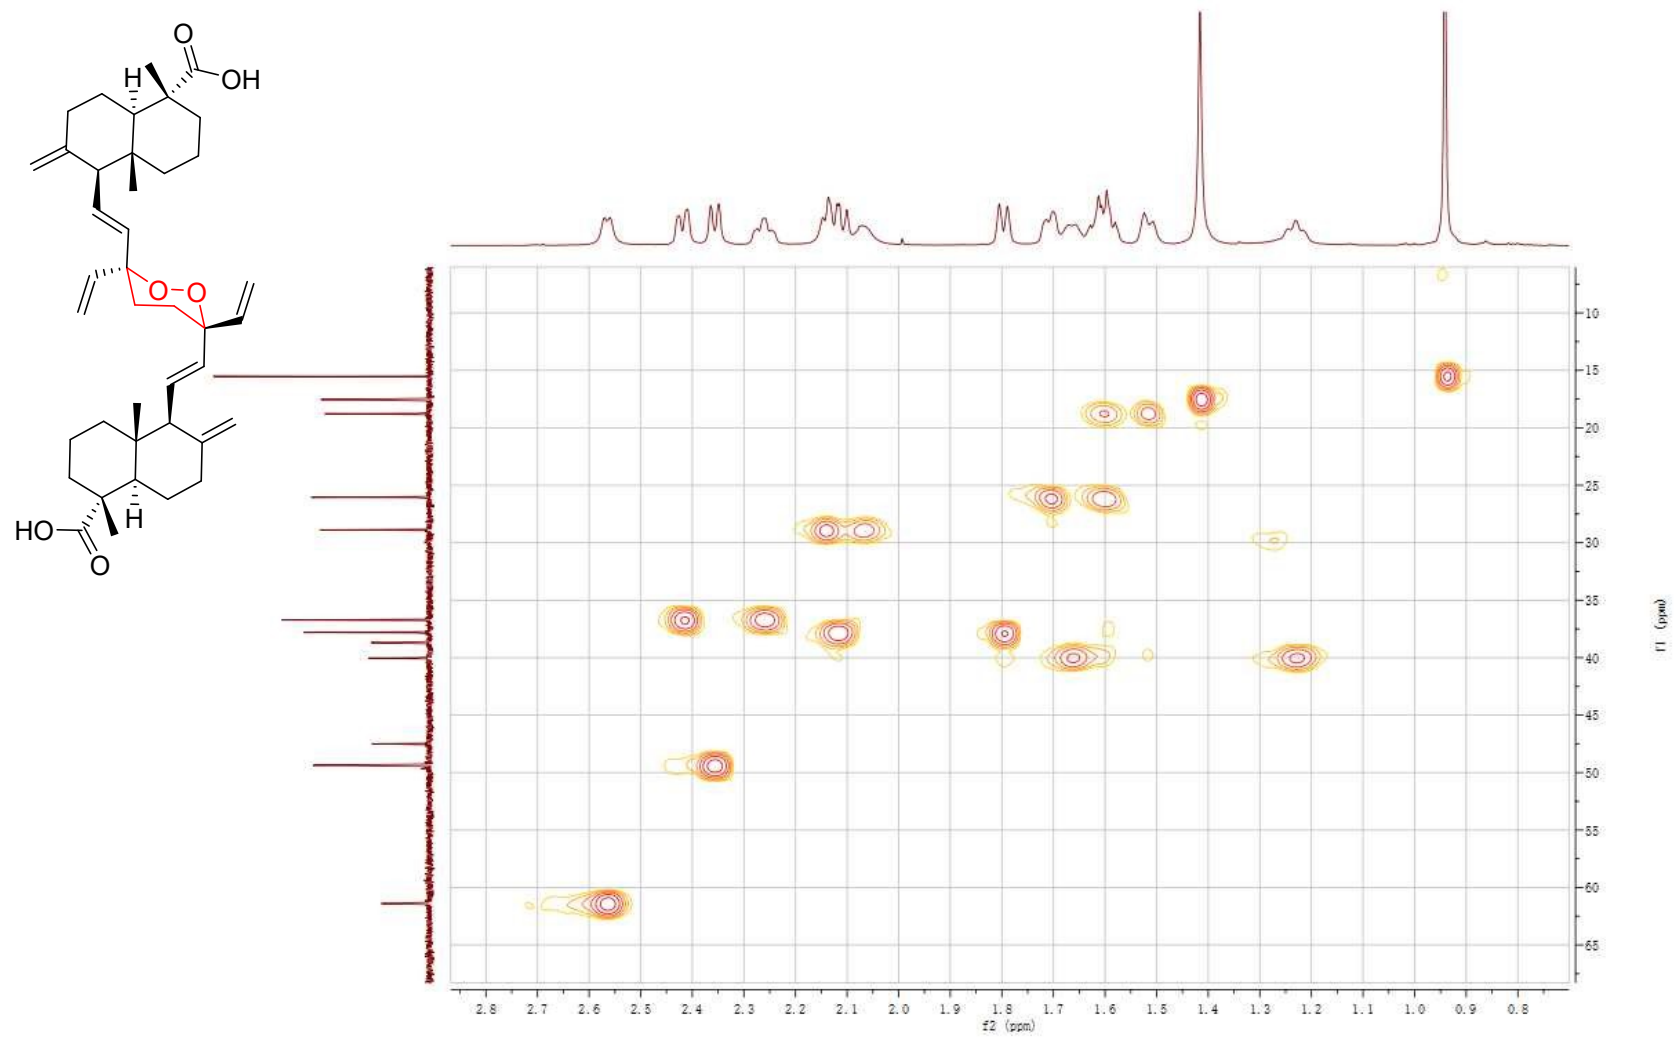

**Figure S6.**  $^1\text{H}$ - $^1\text{H}$  COSY spectrum of cunlanceloic acid A (**1**).

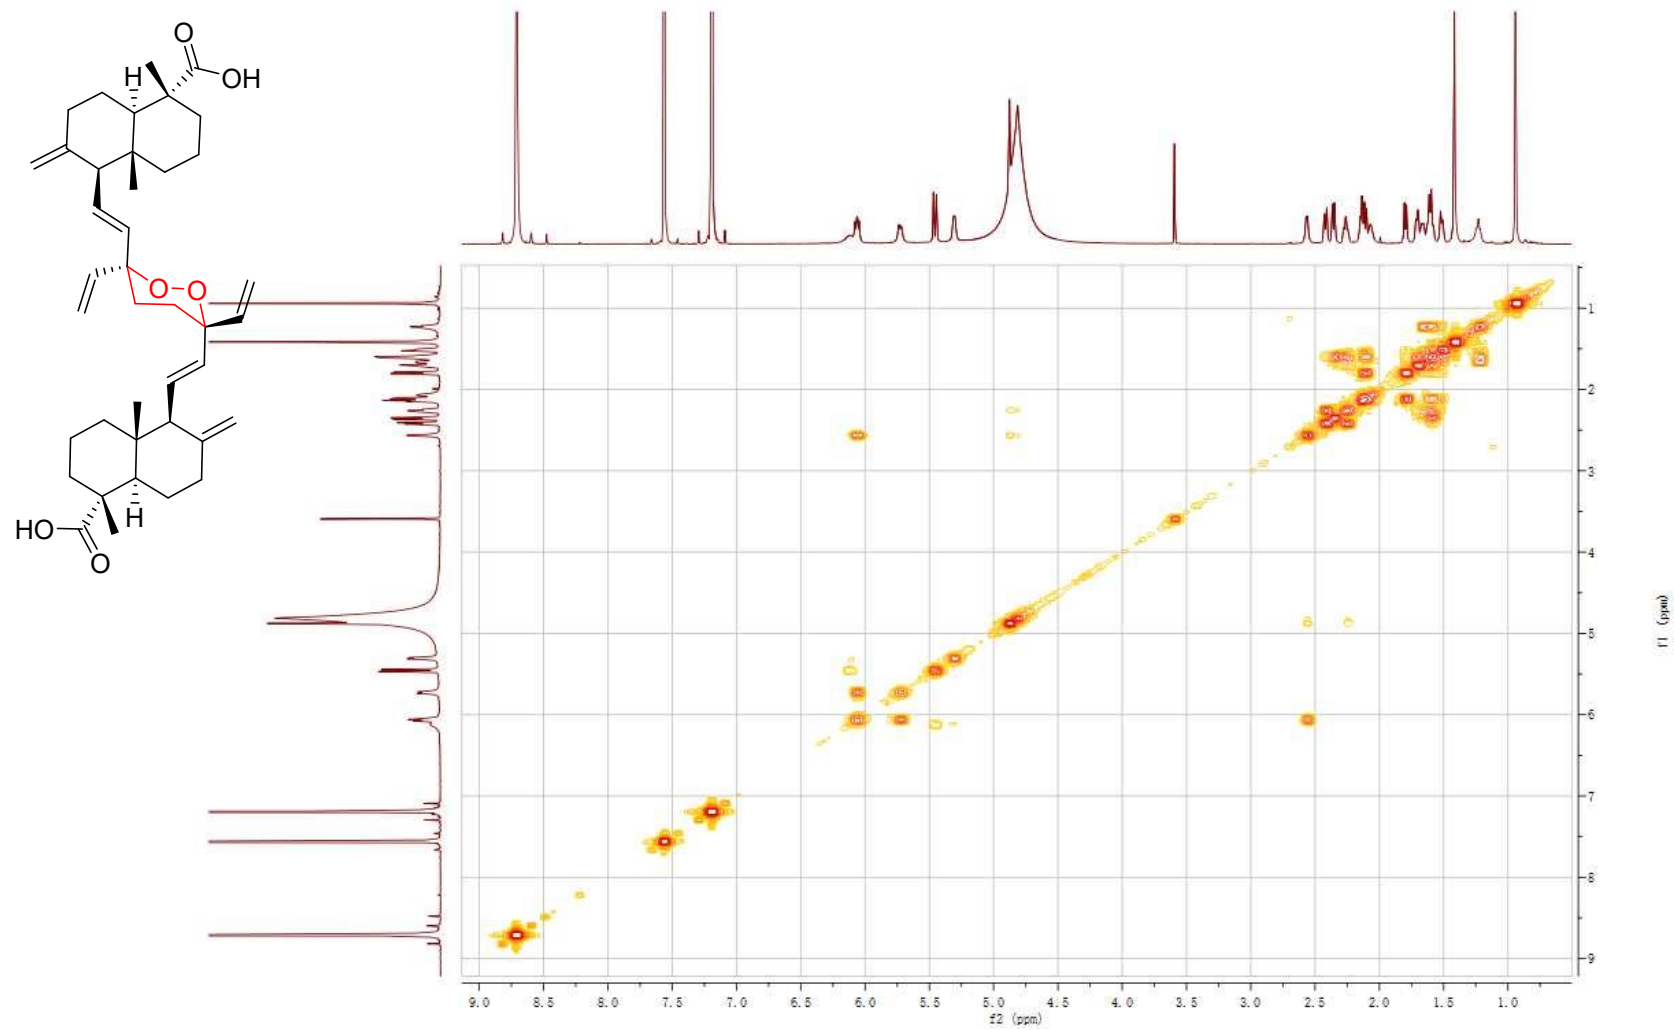

**Figure S7.** Expanded  $^1\text{H}$ - $^1\text{H}$  COSY spectrum of cunlanceloic acid A (**1**).

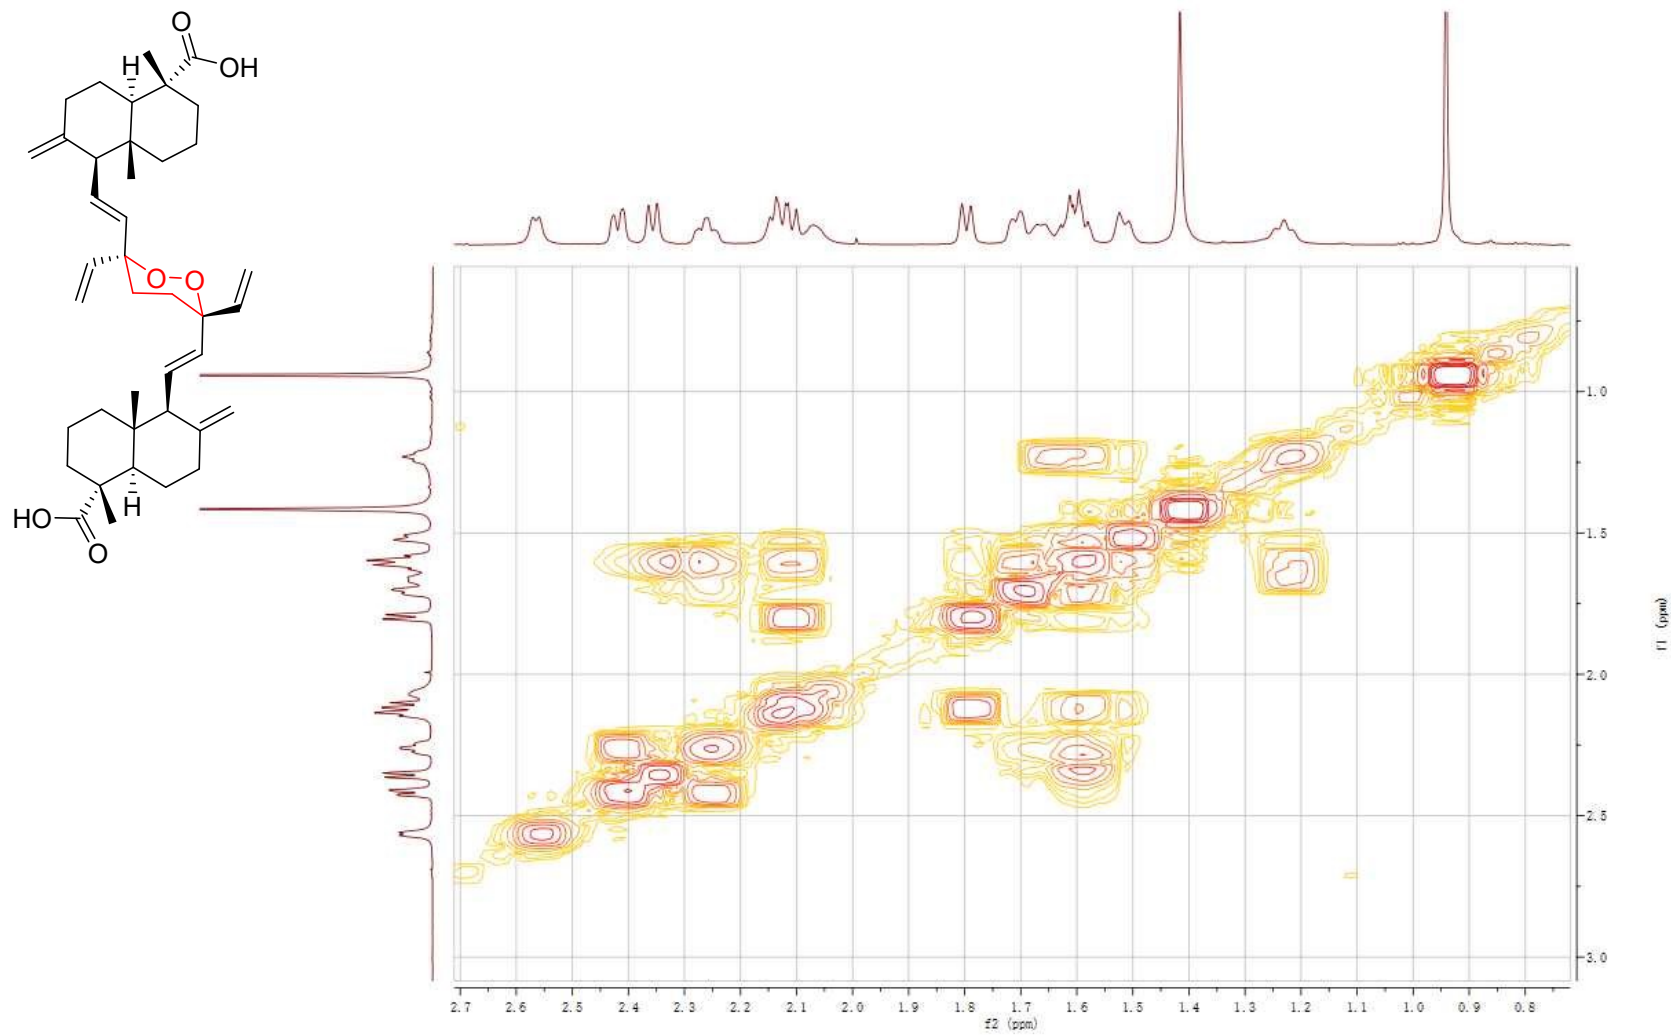

**Figure S8.** HMBC spectrum of cunlanceloic acid A (**1**).

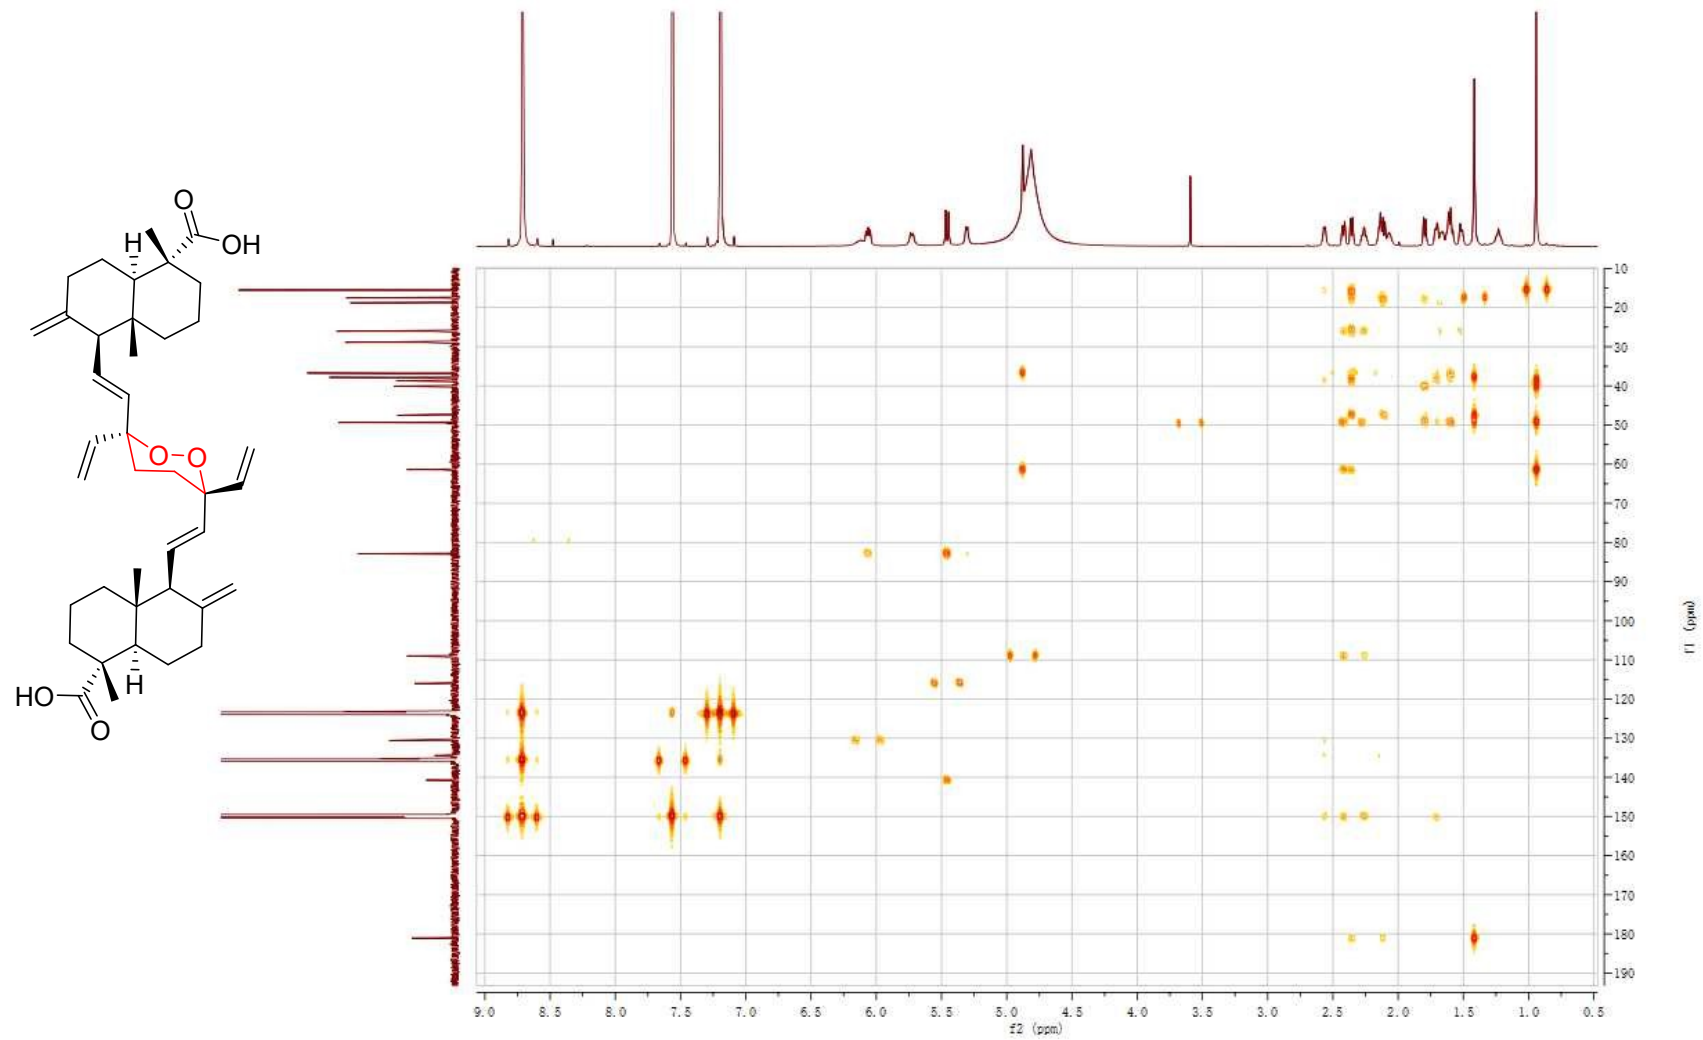

**Figure S9.** Expanded HMBC spectrum of cunlanceloic acid A (**1**).

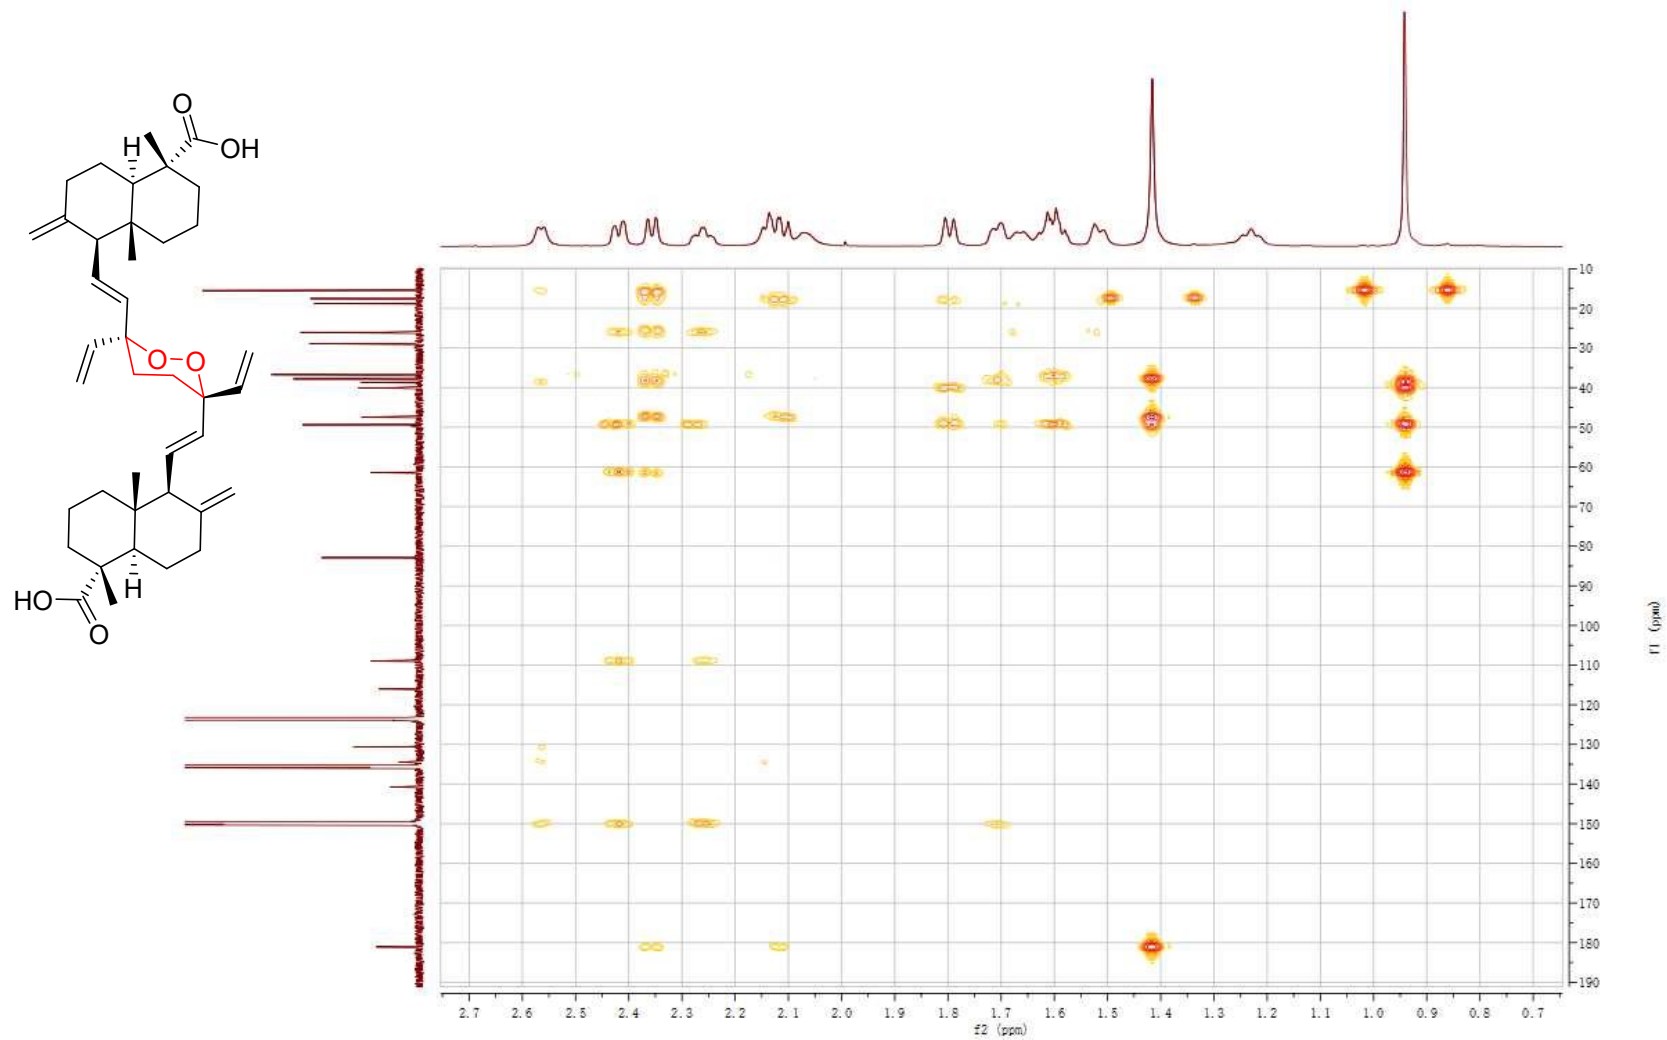



**Figure S10.** ROESY spectrum of cunlanceloic acid A (**1**).

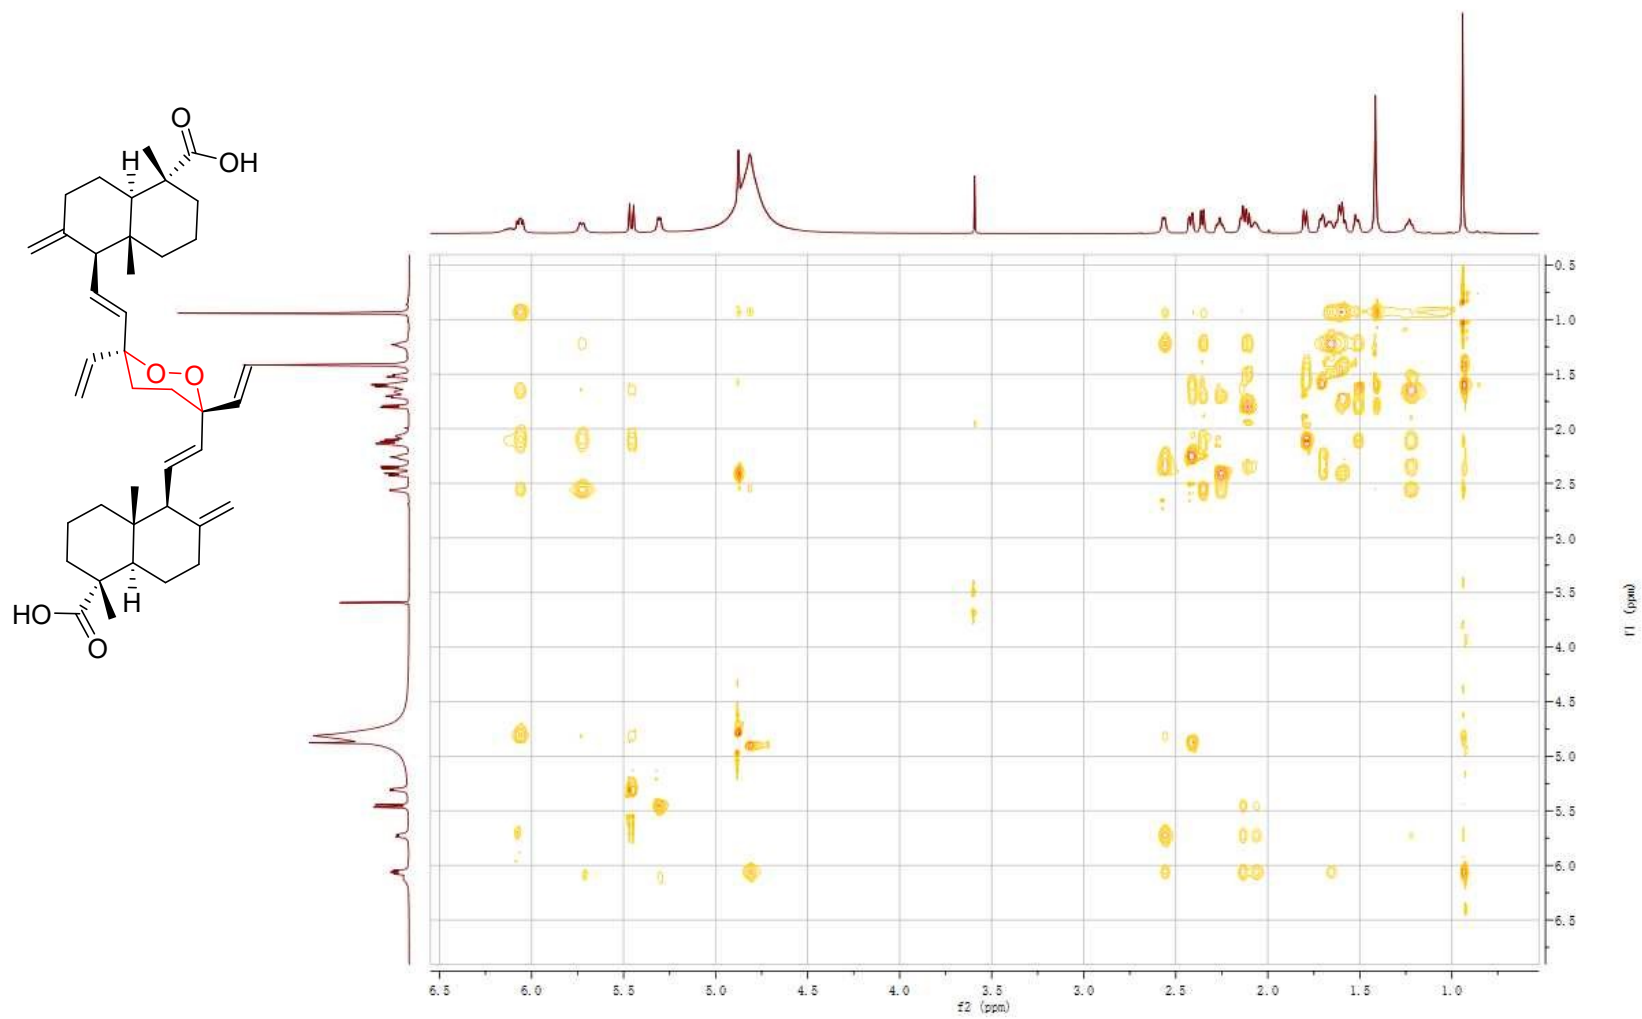

**Figure S11.** Expanded ROESY spectrum of cunlanceloic acid A (**1**).

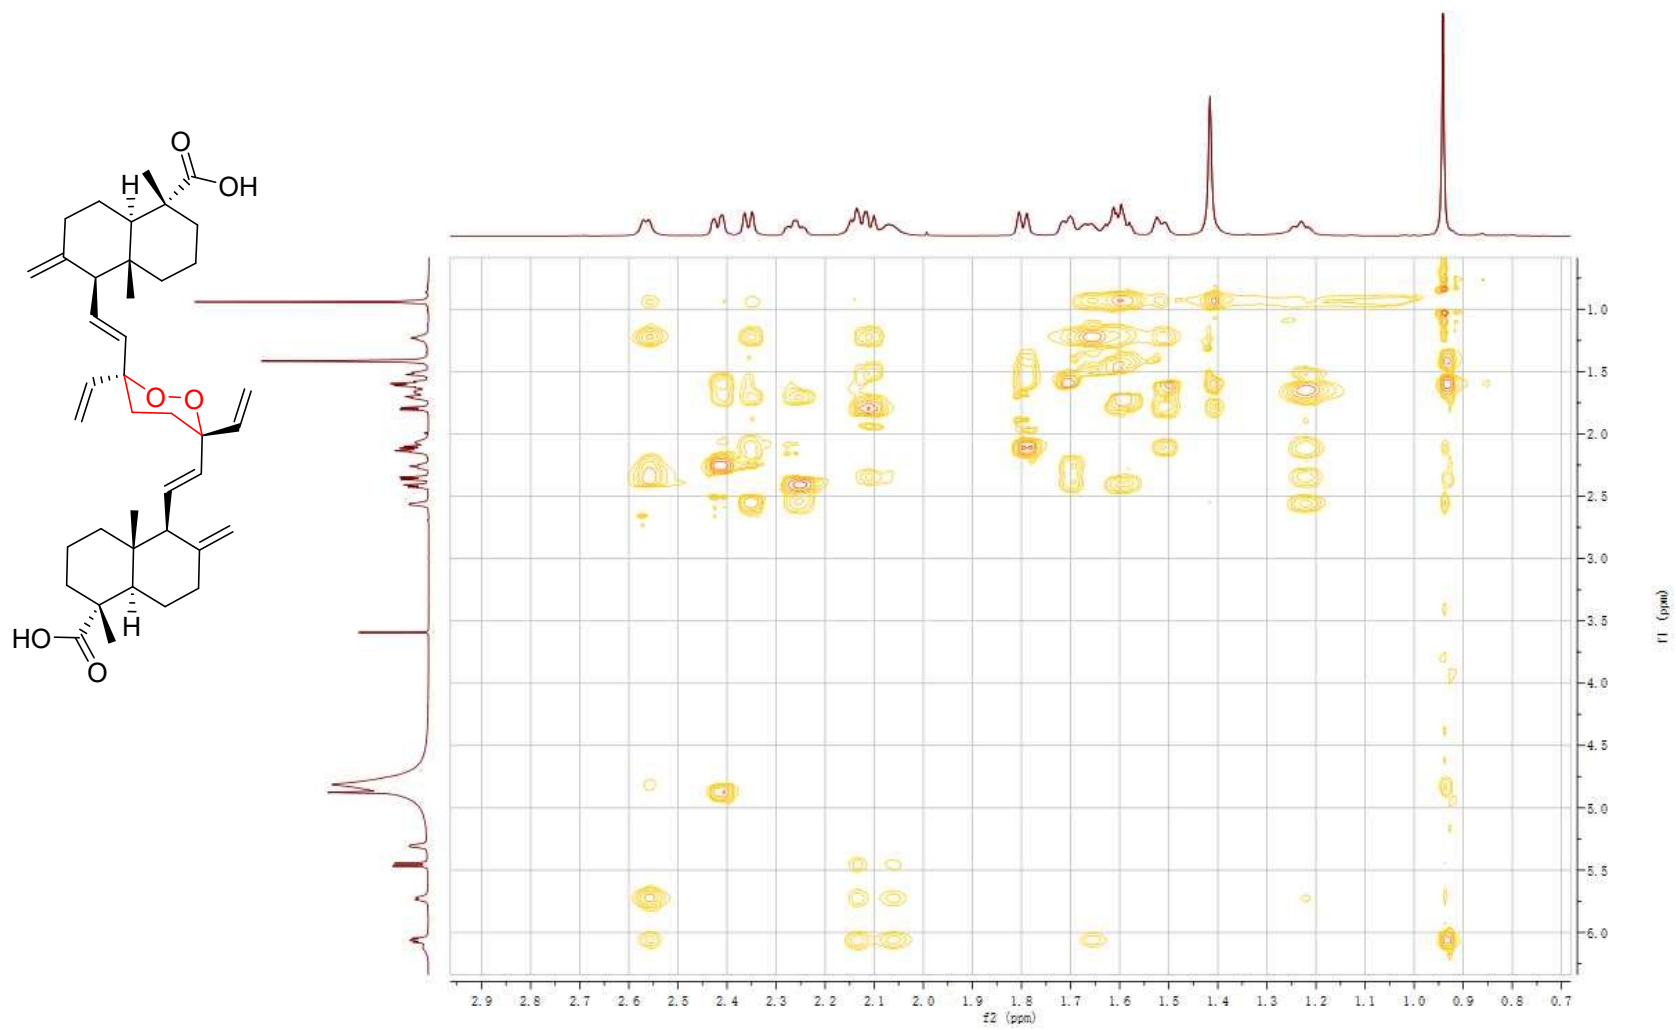

**Figure S12.** ESIMS spectrum of cunlanceloic acid A (1).

**<Spectrum>**

Retention Time:0.413(Scan#:65)

Spectrum:Averaged 0.387-0.453(60-70)

Background:Averaged 0.000-0.364(2-56) MS Stage:MS Polarity:Neg Segment1 - Event2 Precursor:---- Cutoff:

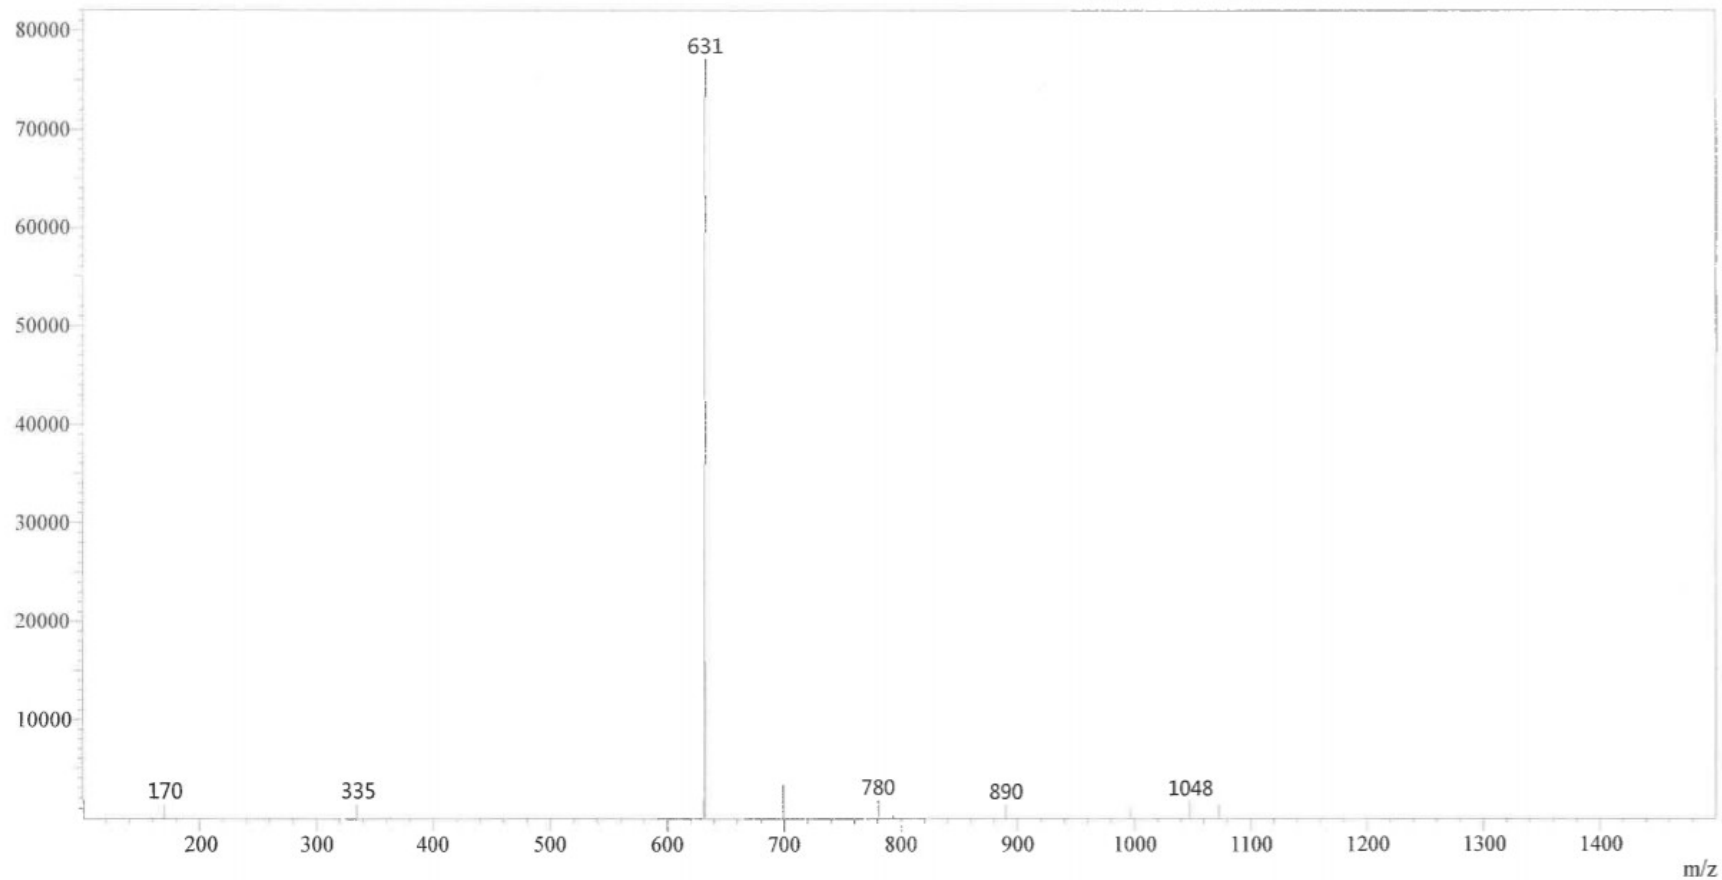

Data File: E:\DATA\2019\0924\1\FWF-187b.lcd

| Elmt | Val. | Min | Max | Use Adduct |
|------|------|-----|-----|------|------|-----|-----|------|------|-----|-----|------|------|-----|-----|------------|
| H    | 1    | 2   | 100 | F    | 1    | 0   | 0   | S    | 2    | 0   | 0   | Pd   | 2    | 0   | 0   | H          |
| 2H   | 1    | 0   | 0   | Na   | 1    | 0   | 0   | Cl   | 1    | 0   | 0   | Ag   | 1    | 0   | 0   | HCOO       |
| C    | 4    | 10  | 50  | Mg   | 2    | 0   | 0   | Cu   | 2    | 0   | 0   | I    | 3    | 0   | 0   | Cl         |
| N    | 3    | 0   | 0   | Si   | 4    | 0   | 0   | Se   | 2    | 0   | 0   |      |      |     |     |            |
| O    | 2    | 0   | 30  | P    | 3    | 0   | 0   | Br   | 1    | 0   | 0   |      |      |     |     |            |

Figure S13. HRES

Error Margin (ppm): 5  
 HC Ratio: unlimited  
 Max Isotopes: all  
 MSn Iso RI (%): 75.00

DBE Range: -2.0 - 100.0  
 Apply N Rule: yes  
 Isotope RI (%): 1.00  
 MSn Logic Mode: OR

Electron Ions: both  
 Use MSn Info: yes  
 Isotope Res: 10000  
 Max Results: 10

Event#: 2 MS(E-) Ret. Time : 0.387 Scan#: 60

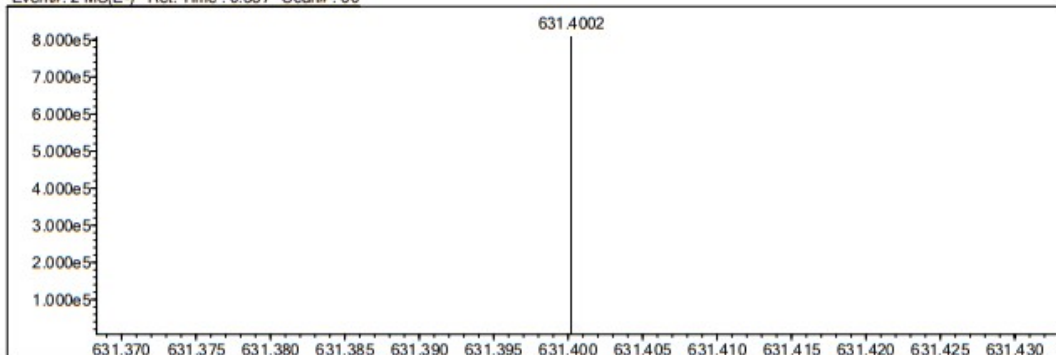

Measured region for 631.4002 m/z

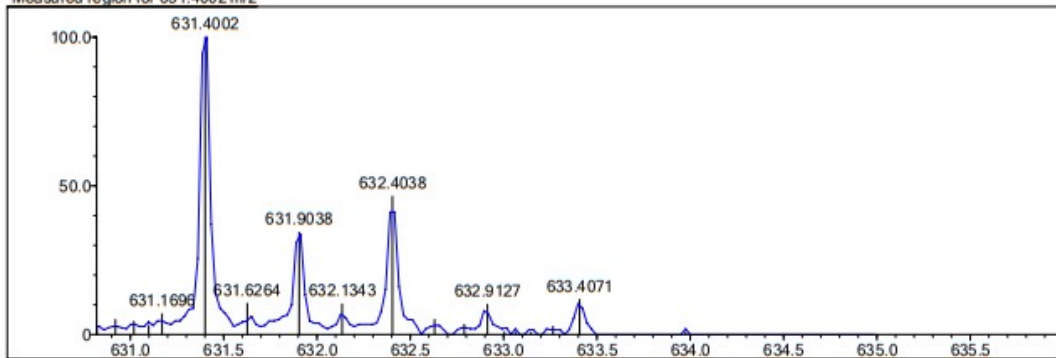

C40 H56 O6 [M-H]- : Predicted region for 631.4004 m/z

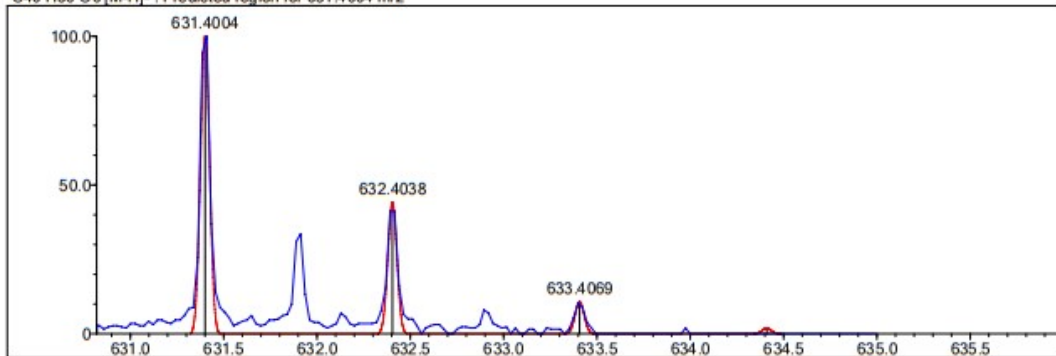

| Formula (M) | Ion    | Meas. m/z | Pred. m/z | Df. (mDa) | Df. (ppm) | DBE  |
|-------------|--------|-----------|-----------|-----------|-----------|------|
| C40 H56 O6  | [M-H]- | 631.4002  | 631.4004  | -0.2      | -0.32     | 13.0 |

Figure S14. IR spectrum of cunlanceloic acid A (1).

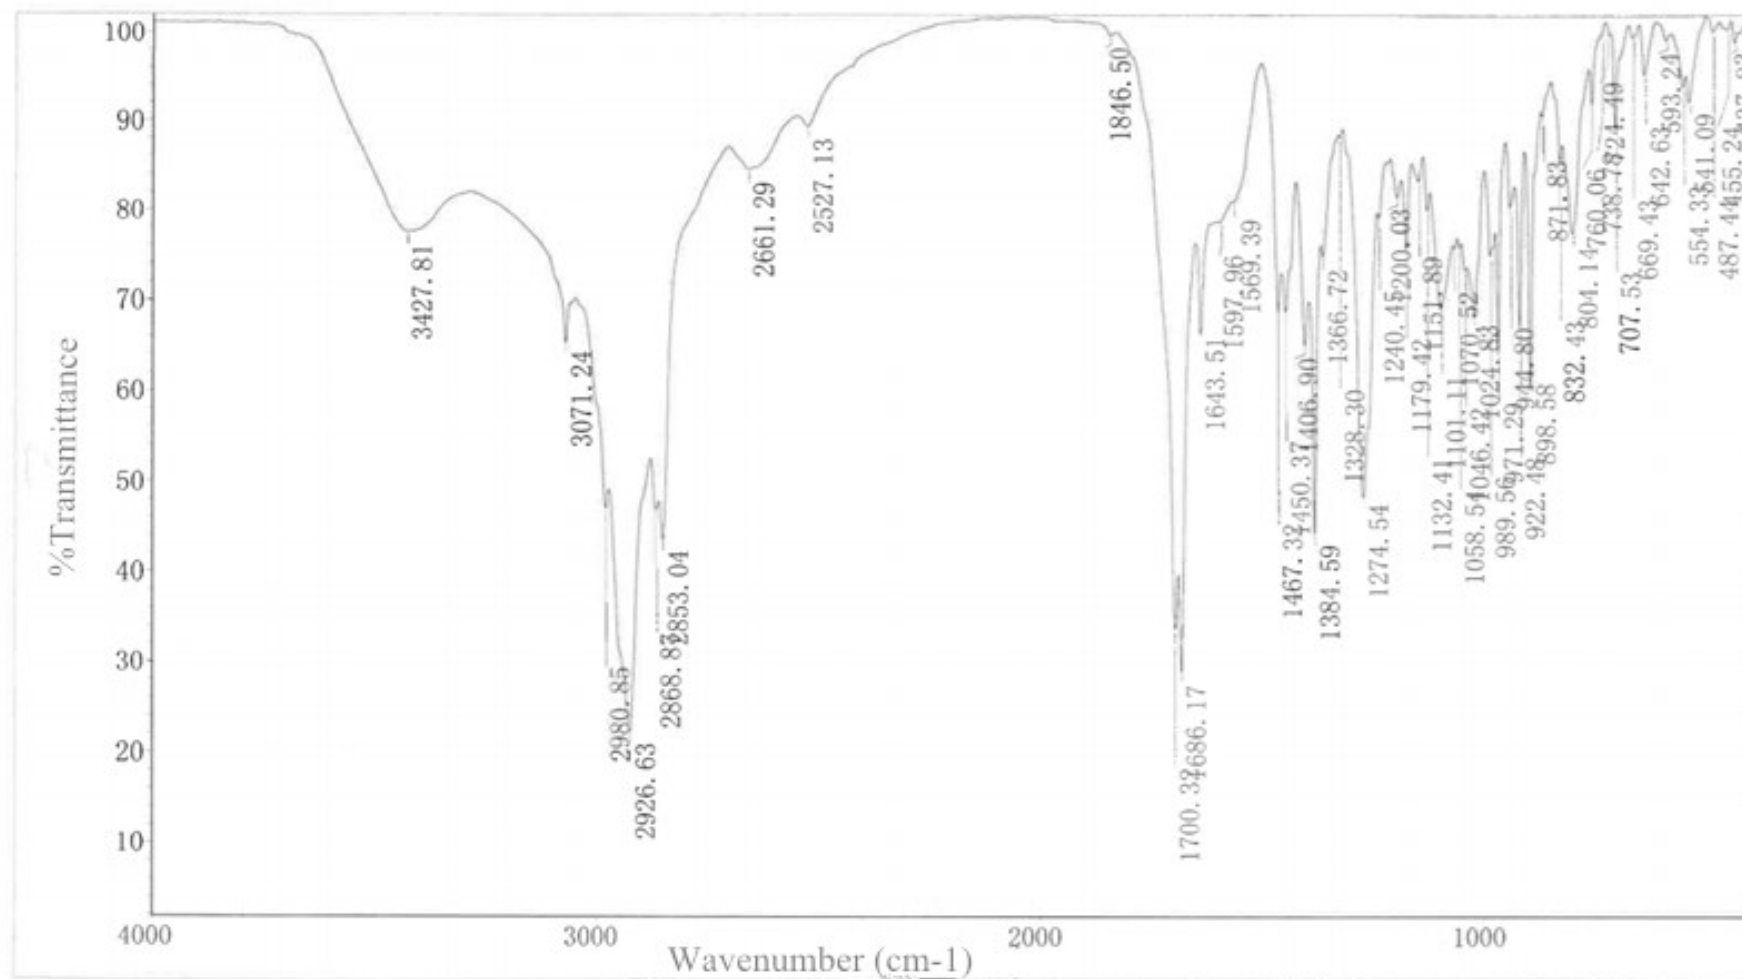

**Figure S15.**  $^1\text{H}$  NMR (800 MHz) spectrum of cunlanceloic acid B (**2**) in pyridine- $d_5$ .

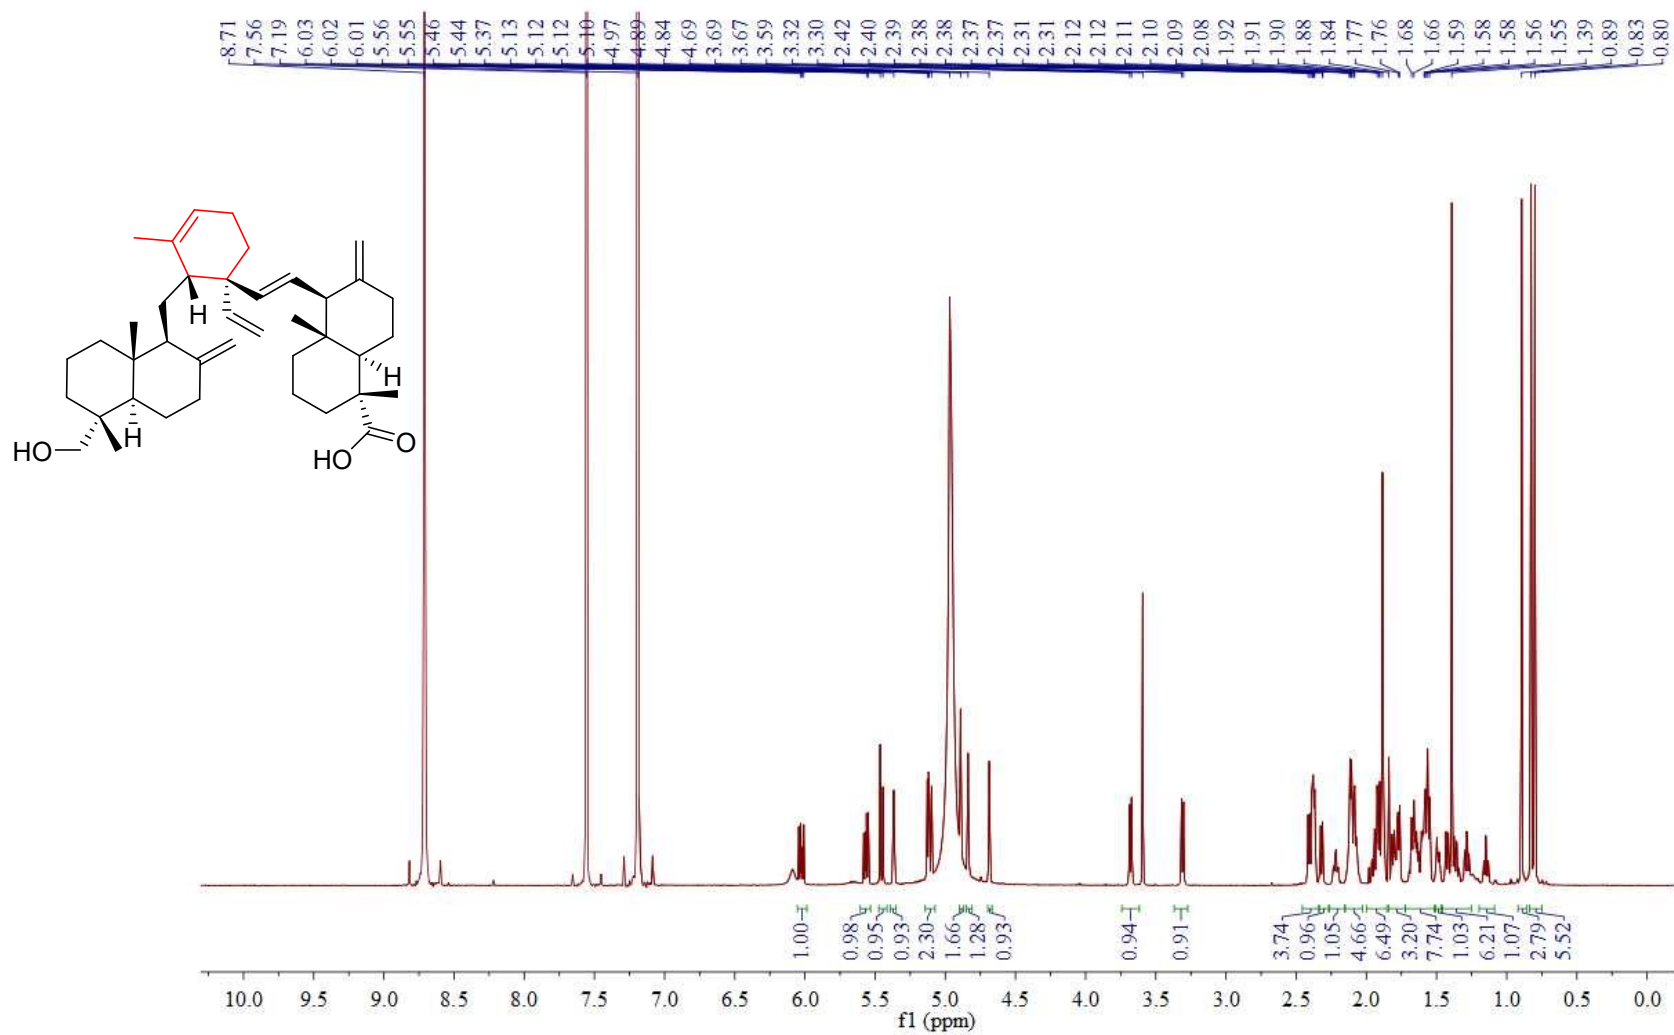

Figure S16. Expanded  $^1\text{H}$  NMR spectrum of cunlanceloic acid B (2).

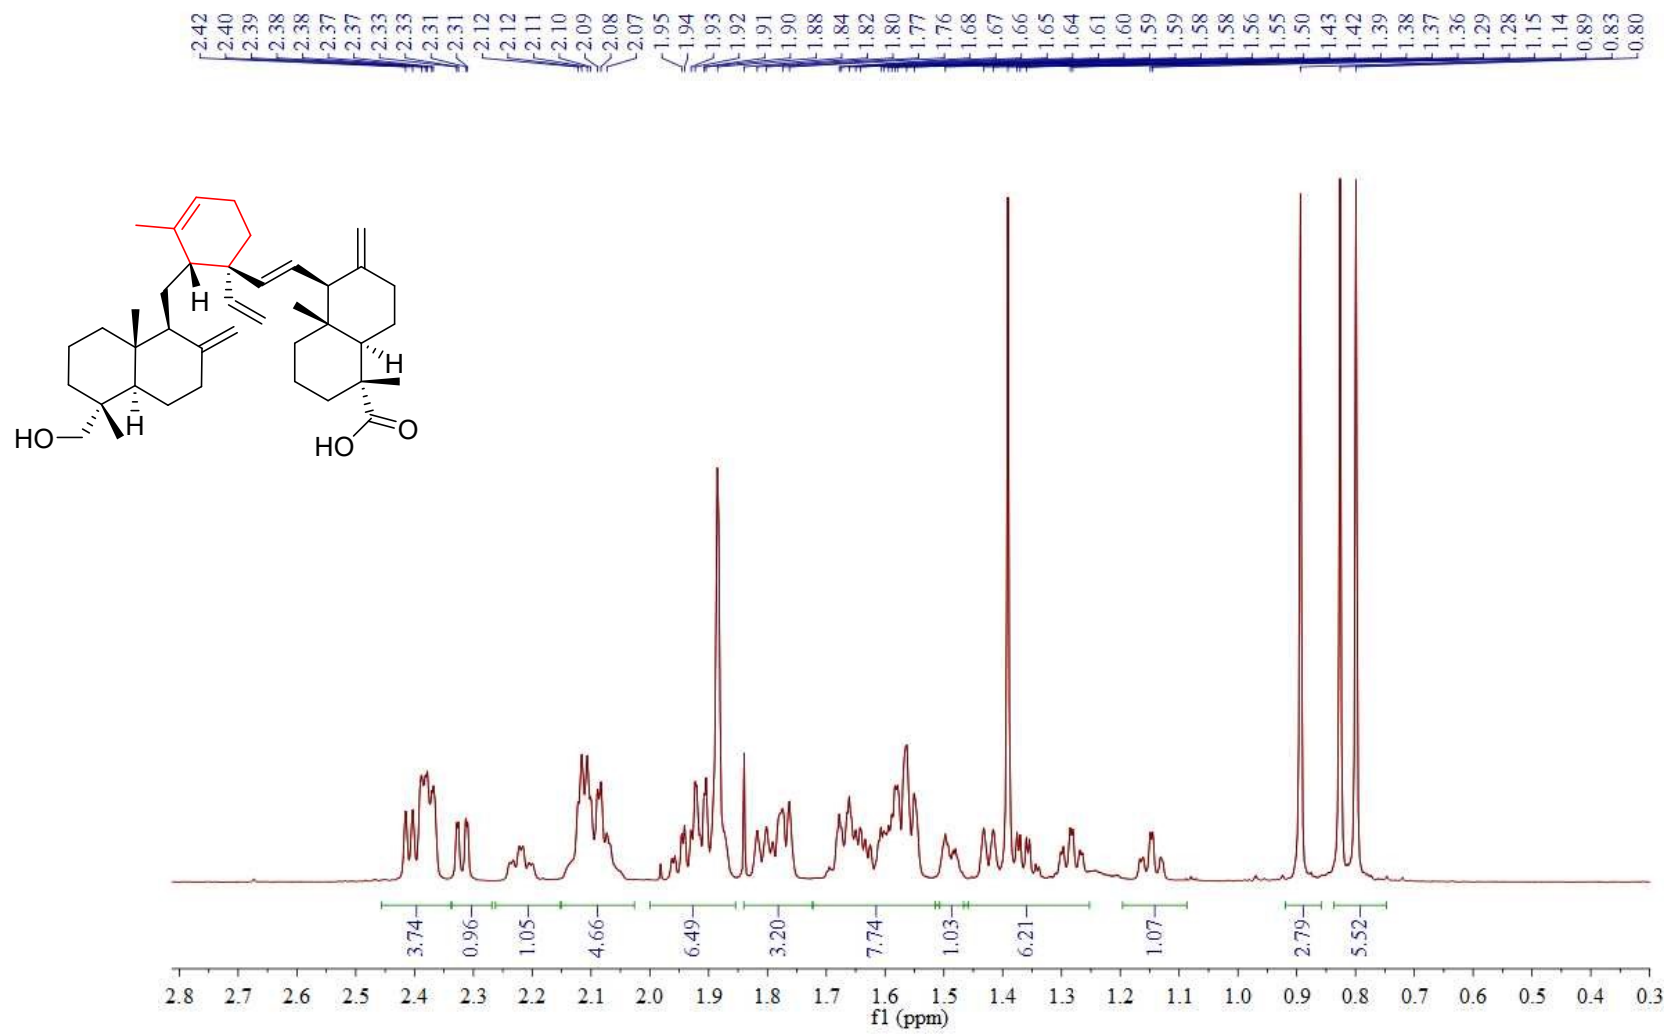

**Figure S17.**  $^{13}\text{C}$  NMR and DEPT (200 MHz) spectra of cunlanceloic acid B (**2**) in pyridine- $d_5$ .

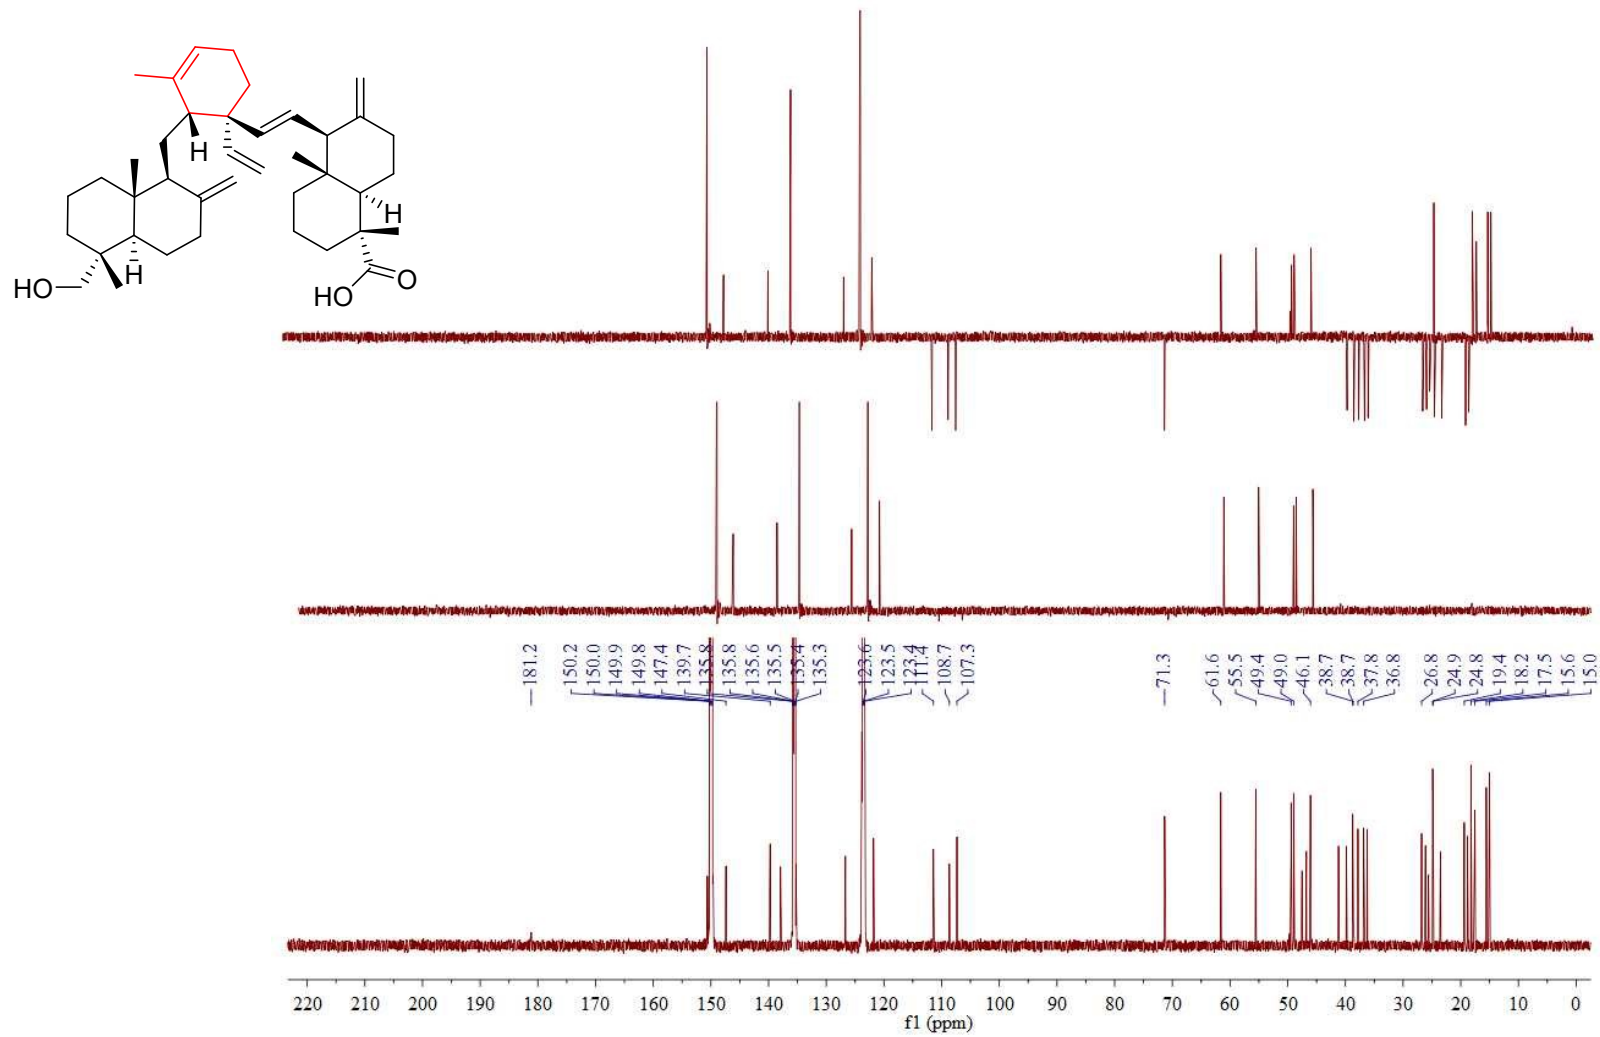



Figure S18. HSQC spectrum of cunlanceloic acid B (2).

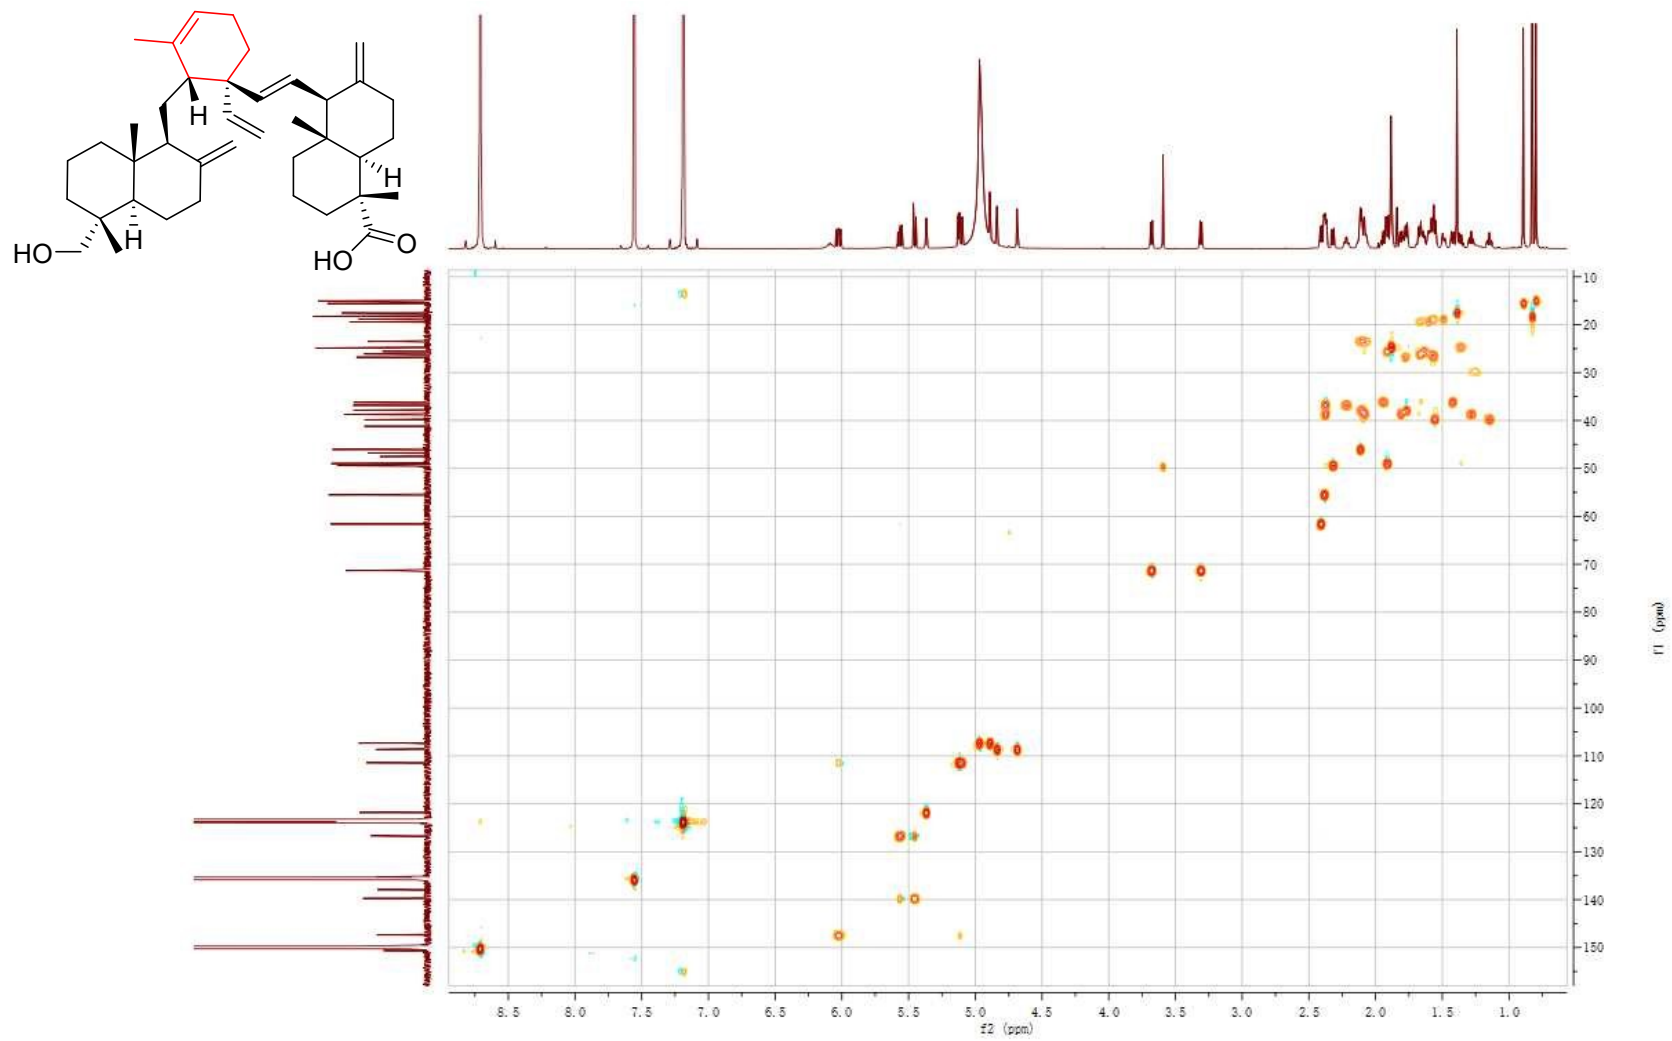

**Figure S19.** Expanded HSQC spectrum of cunlanceloic acid B (**2**).

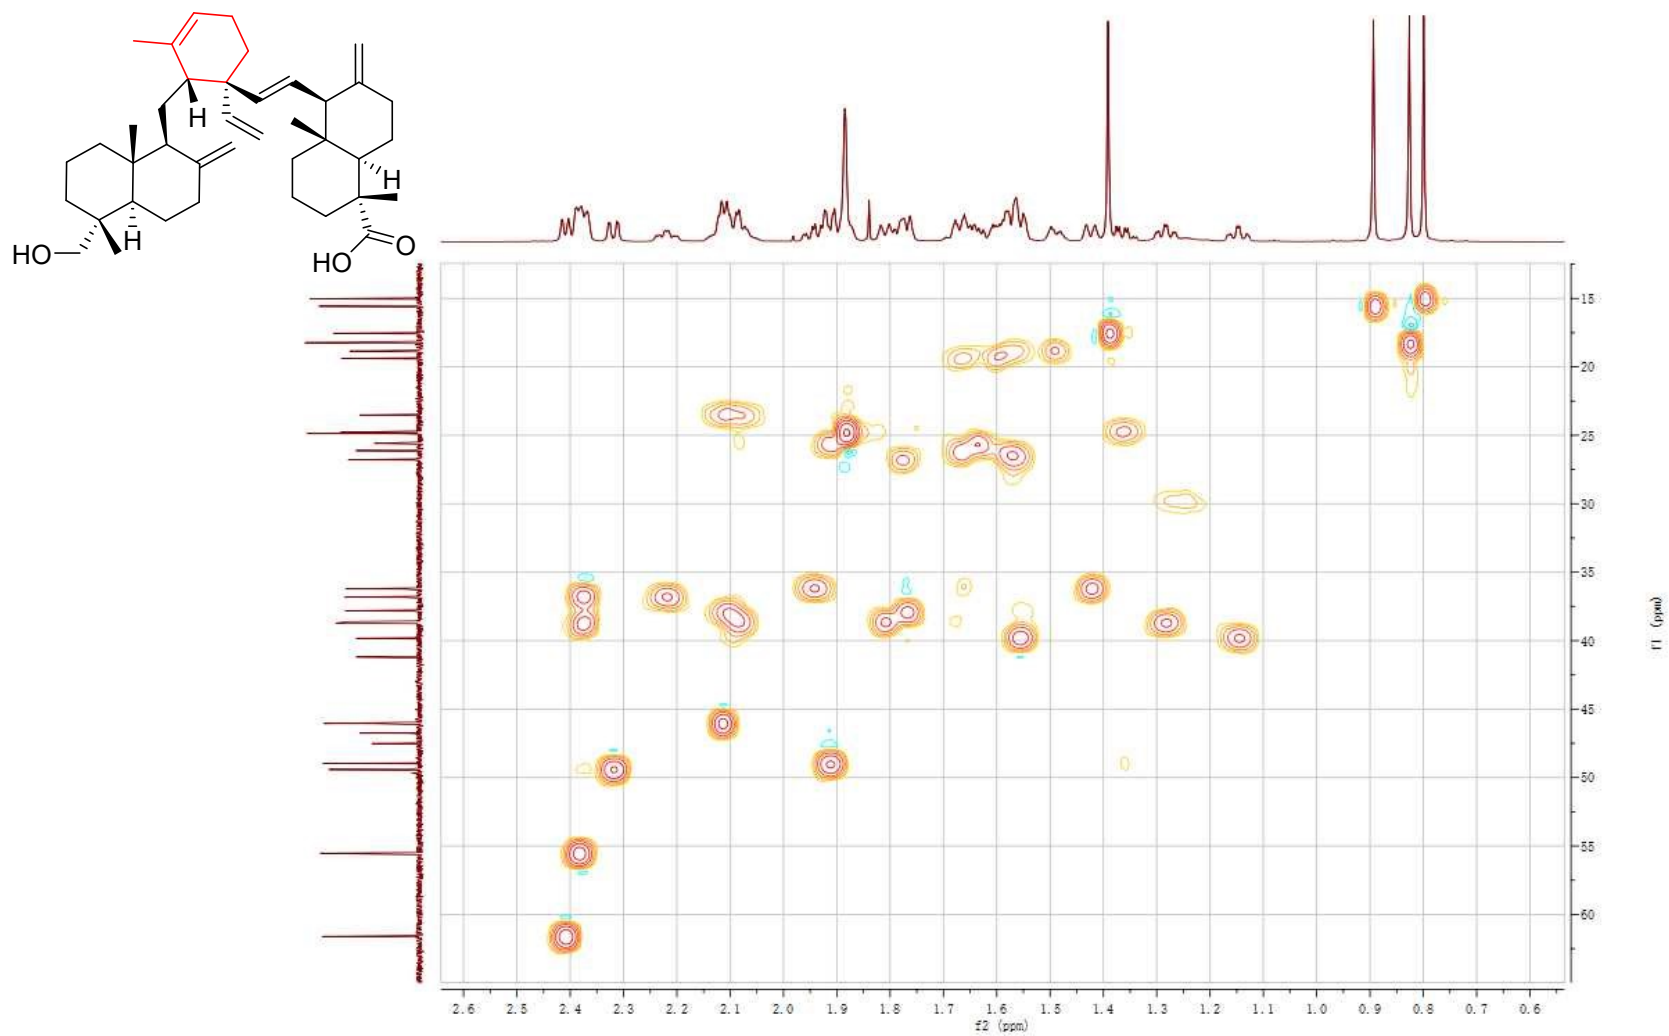

**Figure S20.**  $^1\text{H}$ - $^1\text{H}$  COSY spectrum of cunlanceloic acid B (**2**).

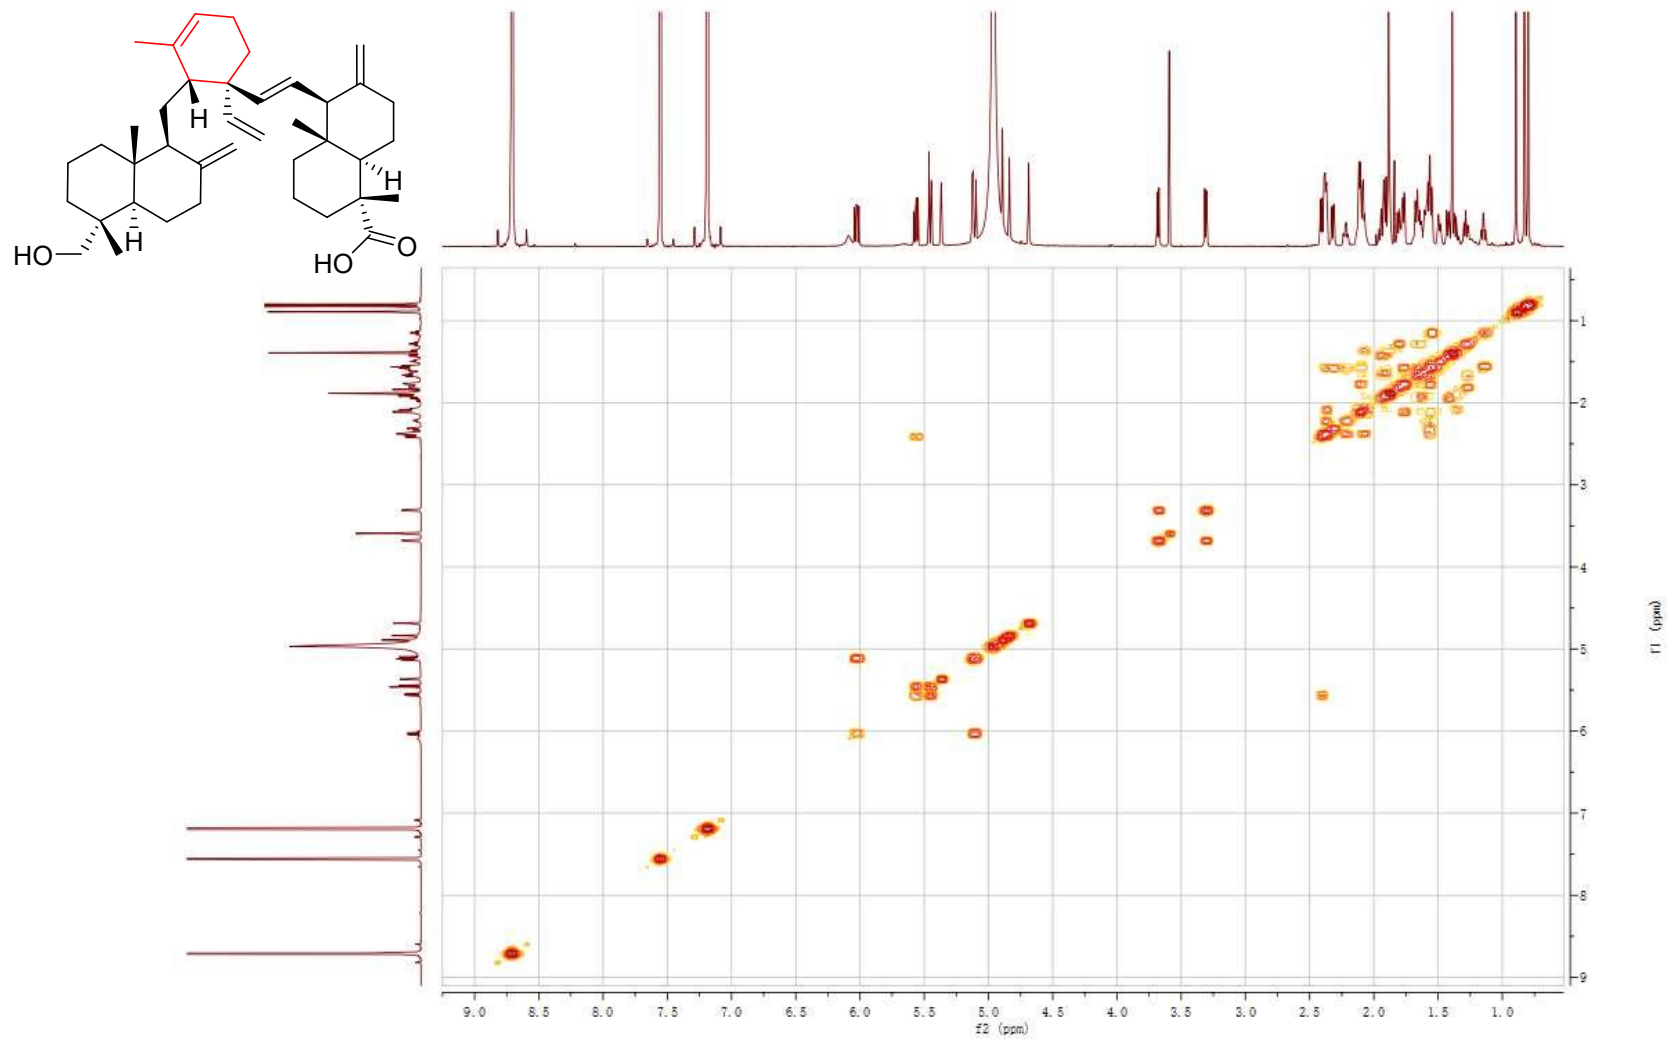

**Figure S21.** Expanded  $^1\text{H}$ - $^1\text{H}$  COSY spectrum of cunlanceloic acid B (**2**).

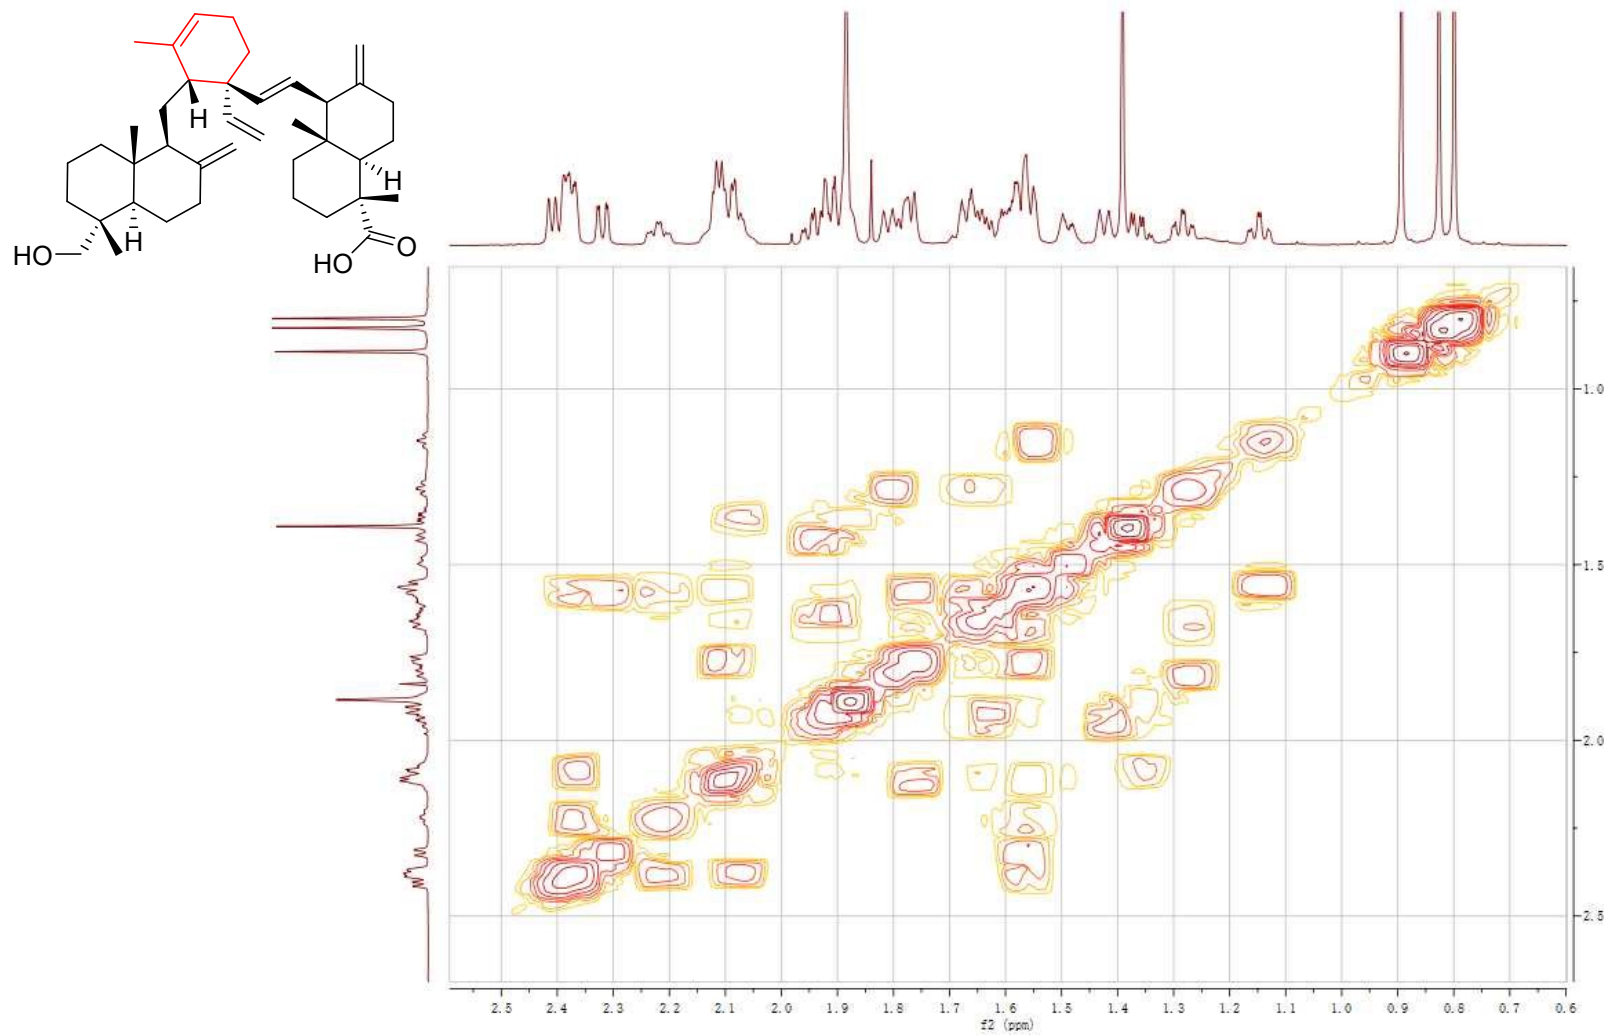

Figure S22. HMBC spectrum of cunlanceloic acid B (2).

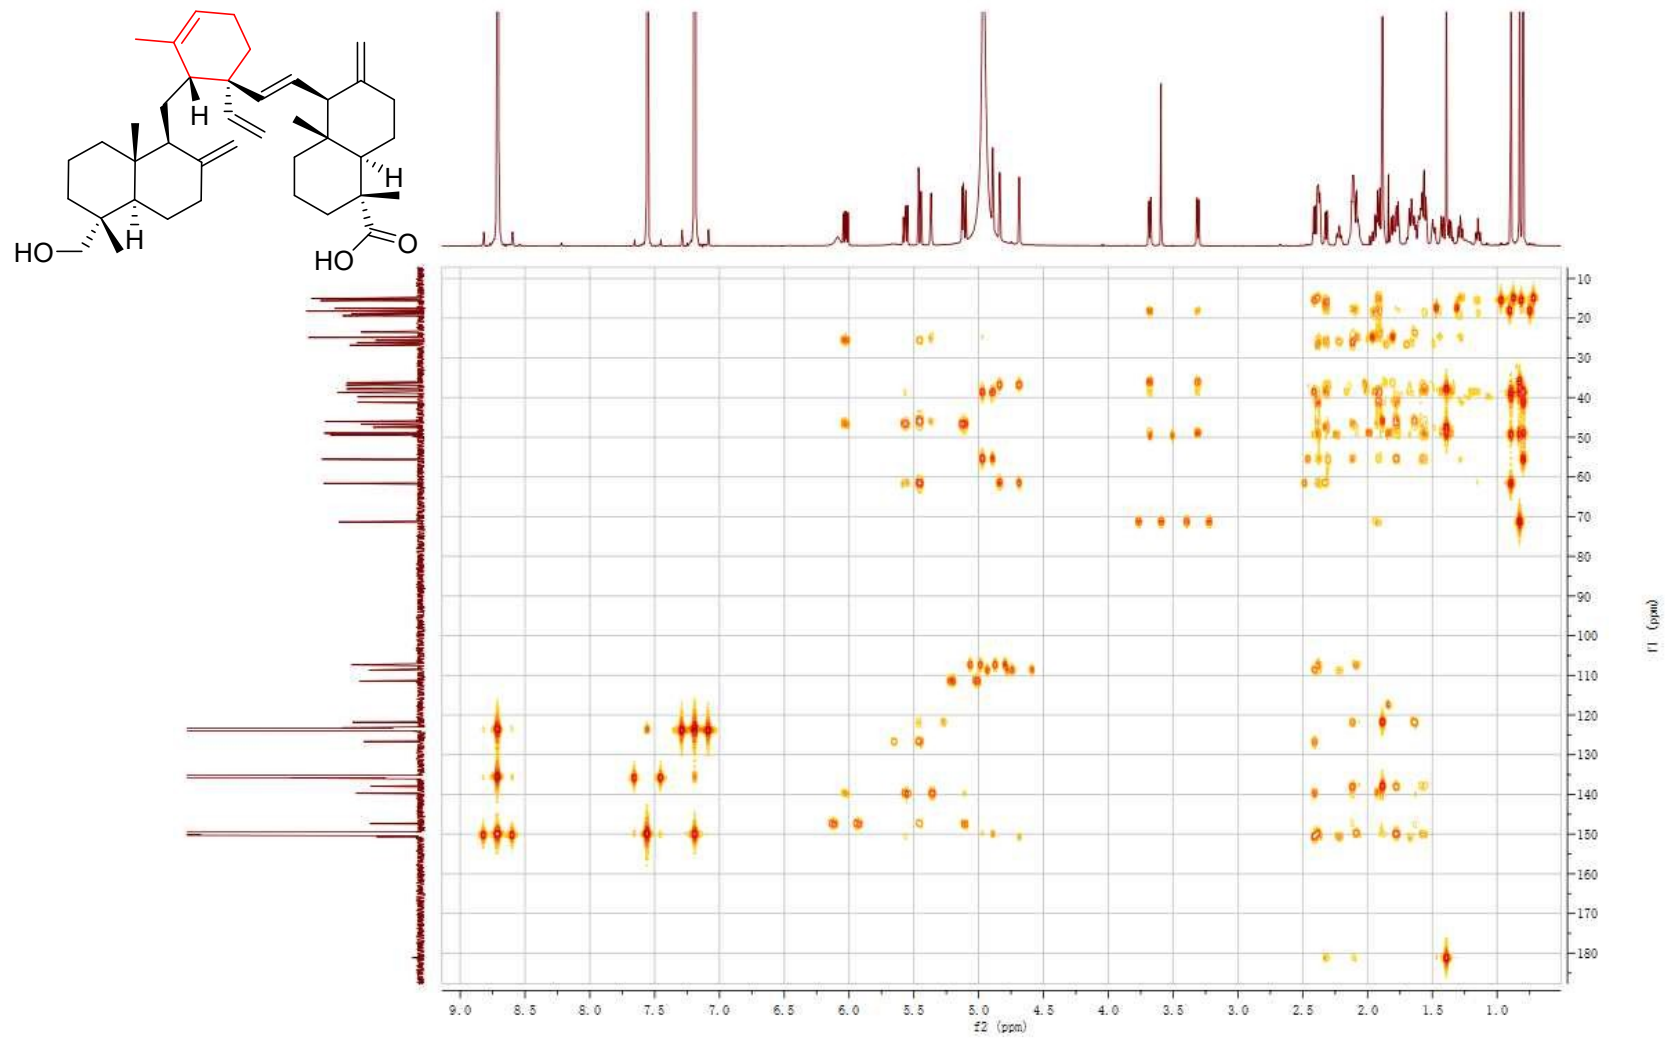

Figure S23. Expanded HMBC spectrum of cunlanceloic acid B (2).

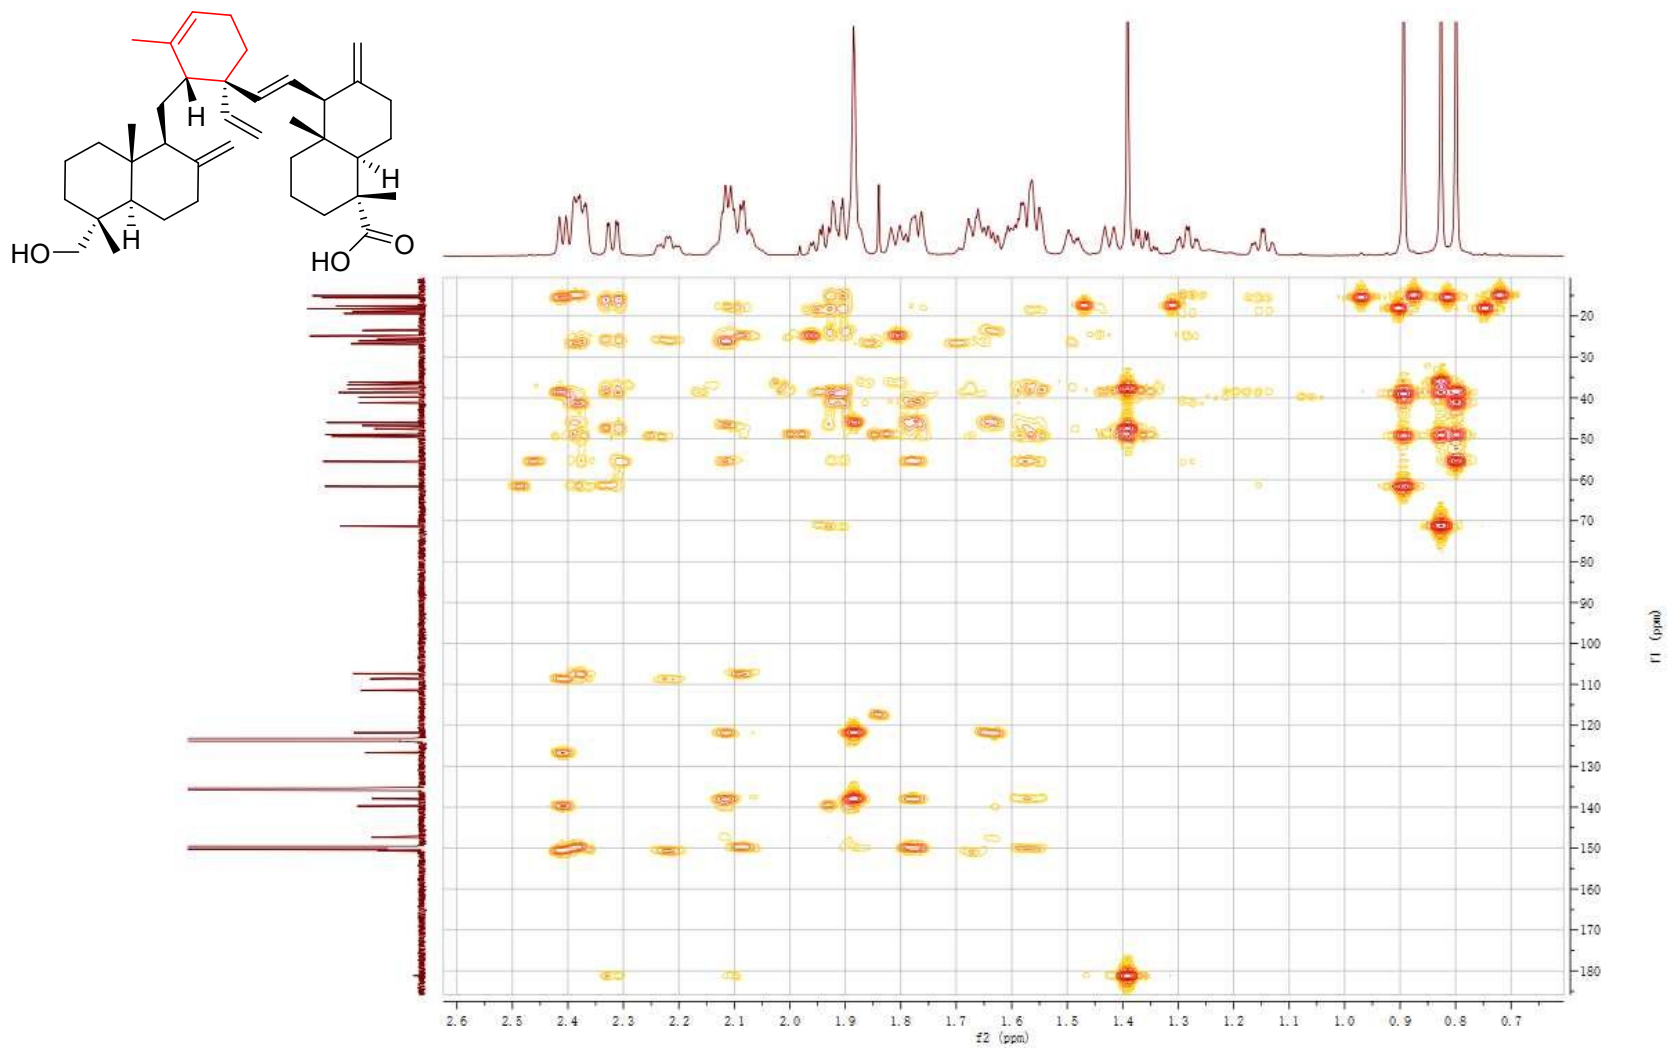

Figure S24. ROESY spectrum of cunlanceloic acid B (2).

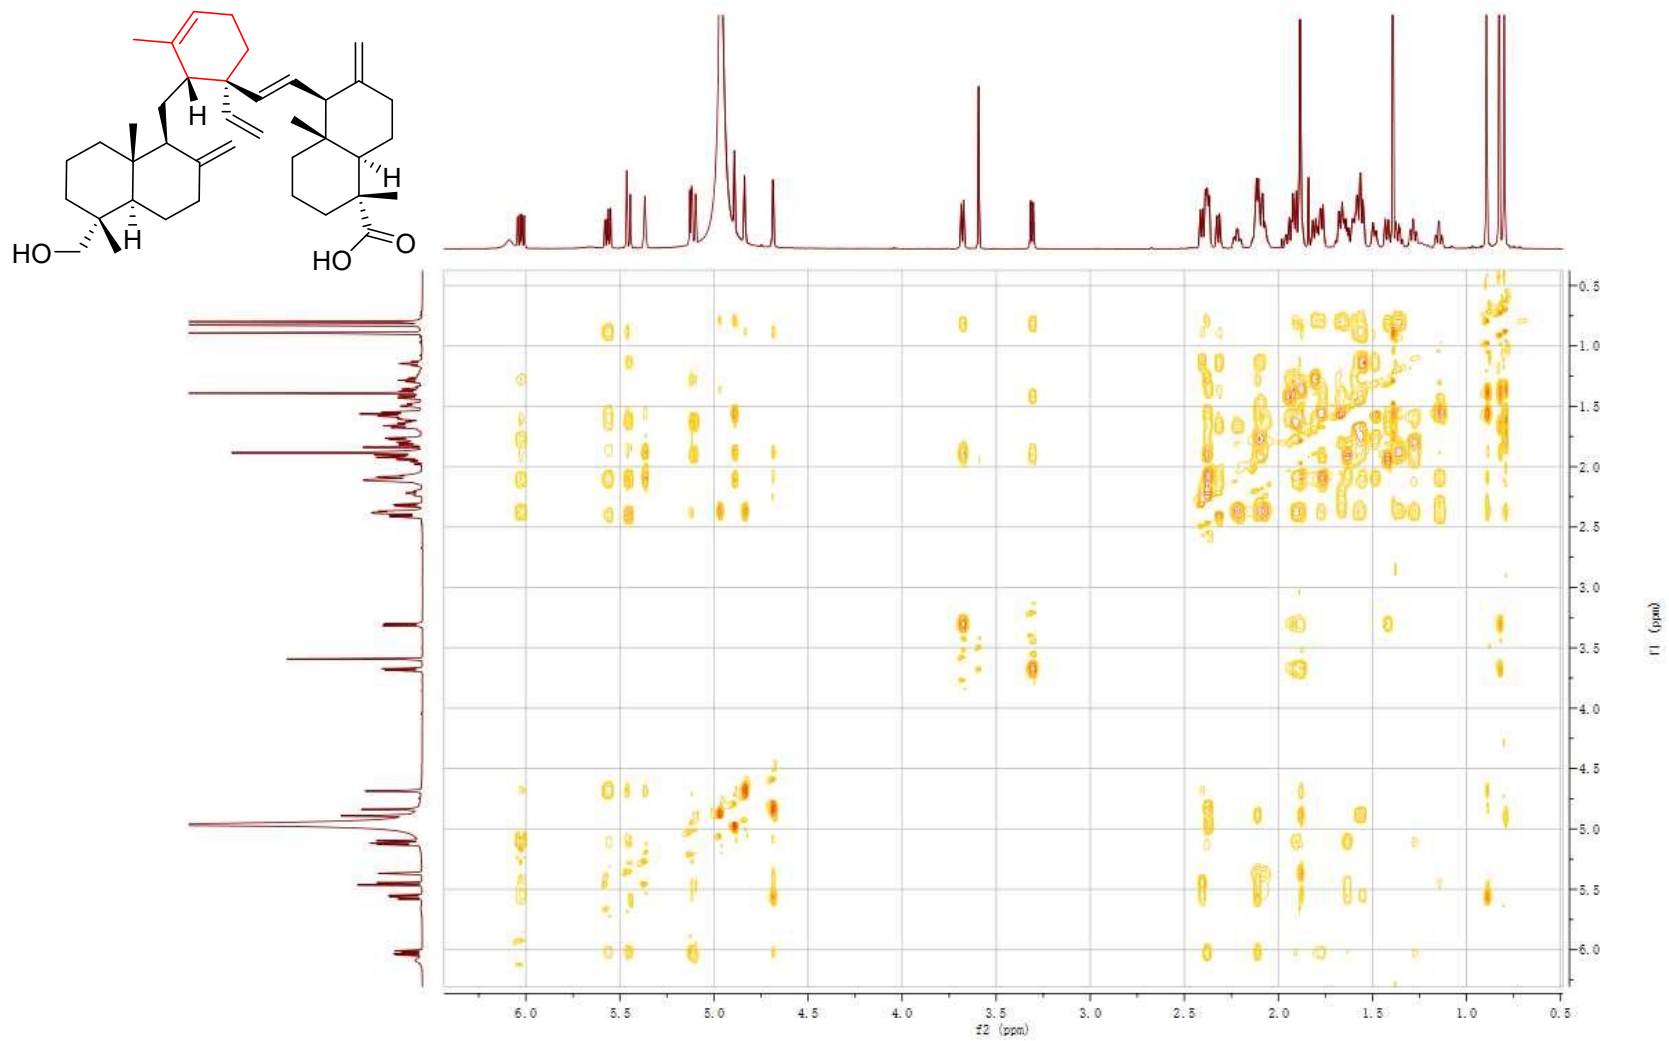

Figure S25. Expanded ROESY spectrum of cunlanceloic acid B (2).

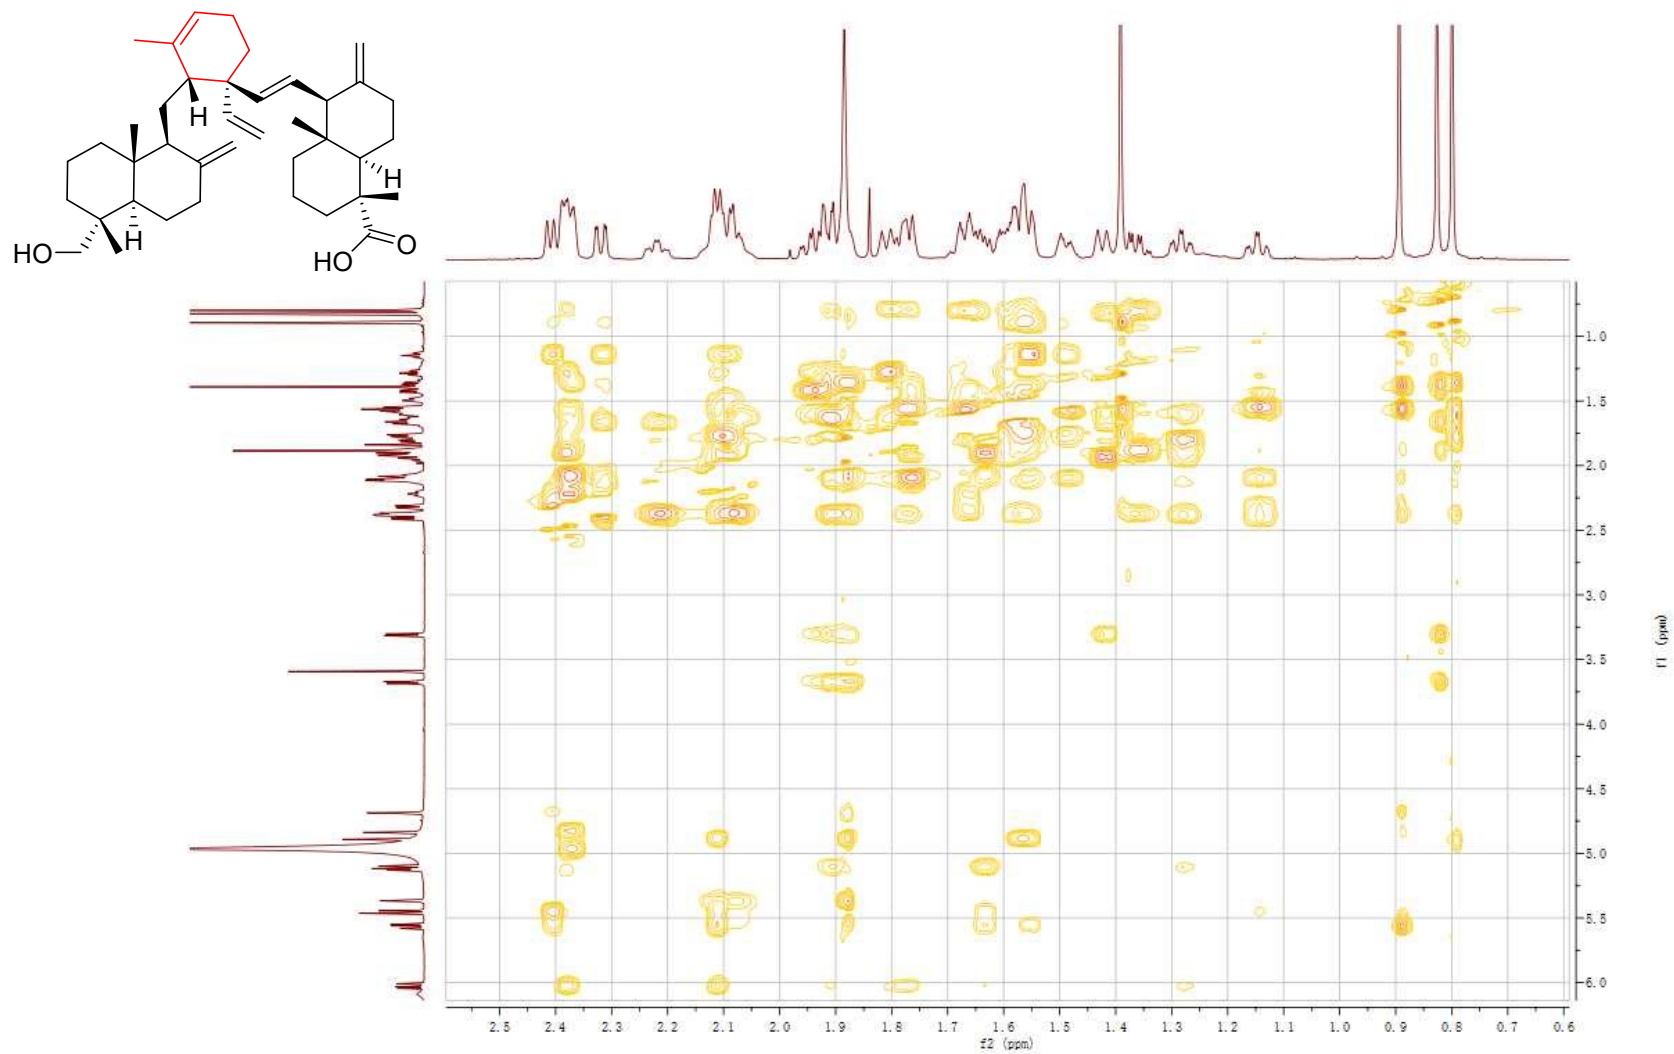



**Figure S26.** ESIMS spectrum of cunlanceloic acid B (2).

**<Spectrum>**

Retention Time:0.480(Scan#:75)

Spectrum:Averaged 0.333-0.640(52-98)

Background:Averaged 0.000-0.394(2-62) MS Stage:MS Polarity:Neg Segment1 - Event2 Precursor:---- Cutoff:

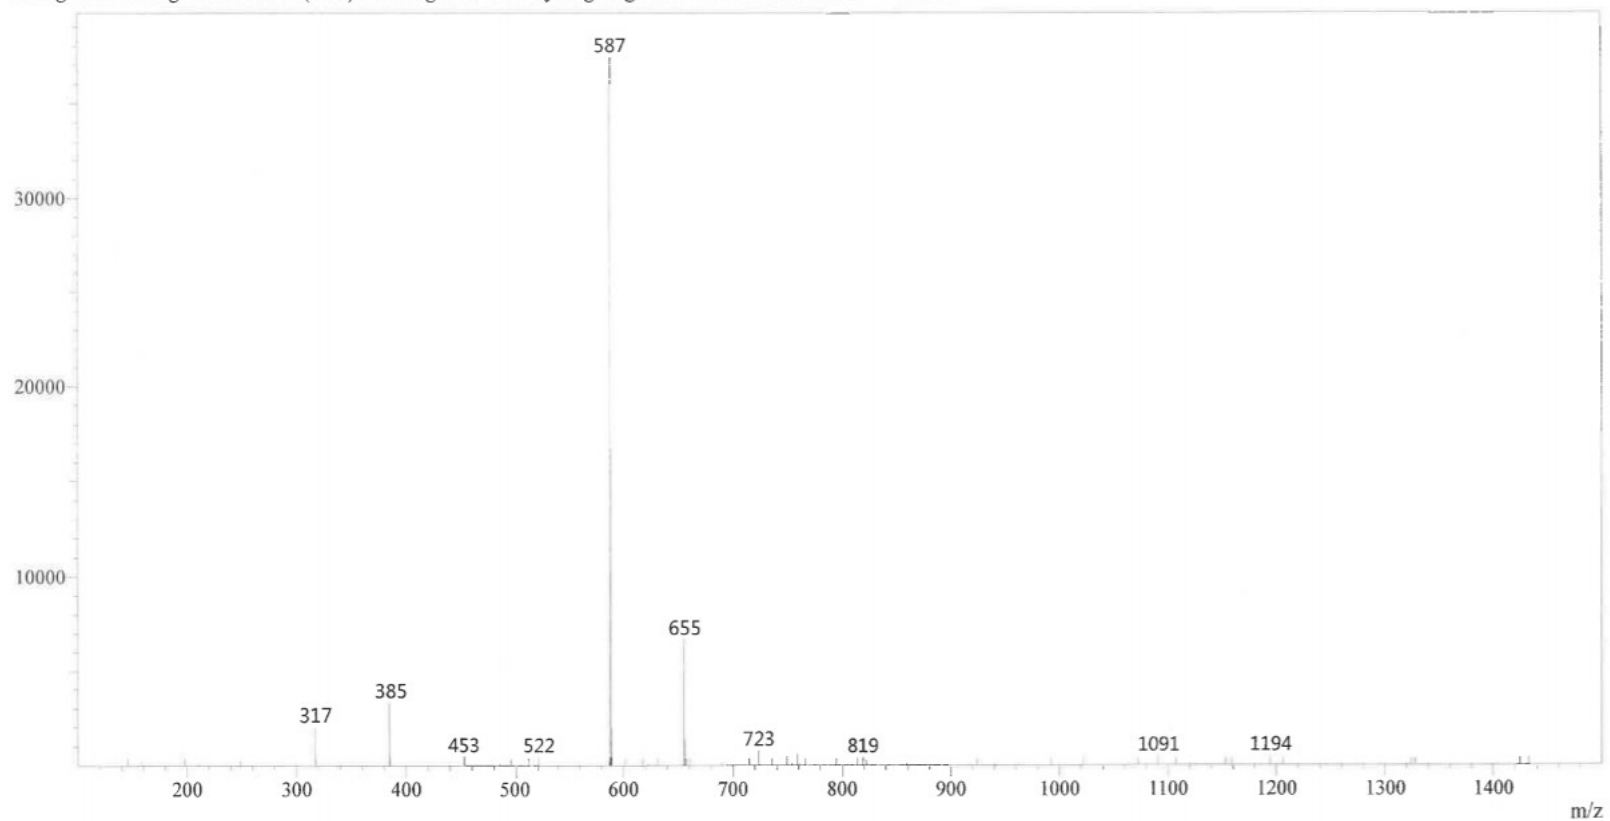

Data File: E:\DATA\2019\0924\1\FWF-200.lcd

Figure S27. HRE

| Elmt | Val. | Min | Max | Use Adduct |
|------|------|-----|-----|------|------|-----|-----|------|------|-----|-----|------|------|-----|-----|------------|
| H    | 1    | 2   | 100 | F    | 1    | 0   | 0   | S    | 2    | 0   | 0   | Pd   | 2    | 0   | 0   | H          |
| 2H   | 1    | 0   | 0   | Na   | 1    | 0   | 0   | Cl   | 1    | 0   | 0   | Ag   | 1    | 0   | 0   | HCOO       |
| C    | 4    | 10  | 50  | Mg   | 2    | 0   | 0   | Cu   | 2    | 0   | 0   | I    | 3    | 0   | 0   | Cl         |
| N    | 3    | 0   | 0   | Si   | 4    | 0   | 0   | Se   | 2    | 0   | 0   |      |      |     |     |            |
| O    | 2    | 0   | 30  | P    | 3    | 0   | 0   | Br   | 1    | 0   | 0   |      |      |     |     |            |

Error Margin (ppm): 5  
 DBE Range: -2.0 - 100.0  
 Electron Ions: both  
 HC Ratio: unlimited  
 Apply N Rule: yes  
 Use MSn Info: yes  
 Max Isotopes: all  
 Isotope RI (%): 1.00  
 MSn Iso RI (%): 75.00  
 MSn Logic Mode: OR  
 Isotope Res: 10000  
 Max Results: 10

Event#: 2 MS(E-) Ret. Time : 0.307 -> 0.360 Scan# : 48 -> 56

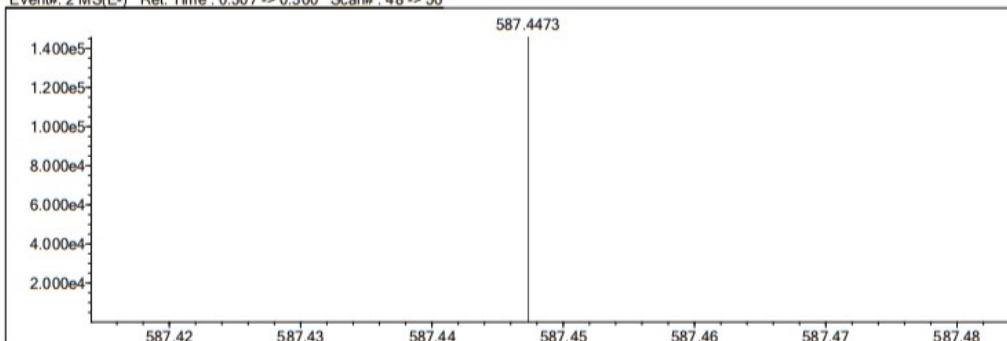

Measured region for 587.4473 m/z

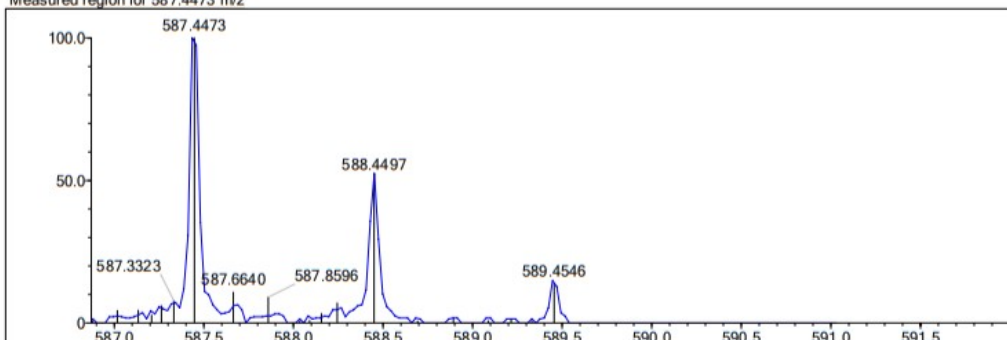

C40 H60 O3 [M-H]- : Predicted region for 587.4470 m/z

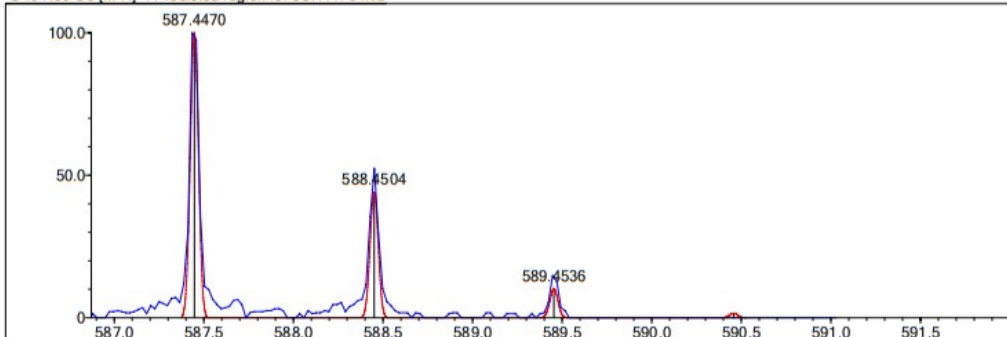

| Formula (M) | Ion    | Meas. m/z | Pred. m/z | Df. (mDa) | Df. (ppm) | DBE  |
|-------------|--------|-----------|-----------|-----------|-----------|------|
| C40 H60 O3  | [M-H]- | 587.4473  | 587.4470  | 0.3       | 0.51      | 11.0 |

Figure S28. IR spectrum of cunlanceloic acid B (2).

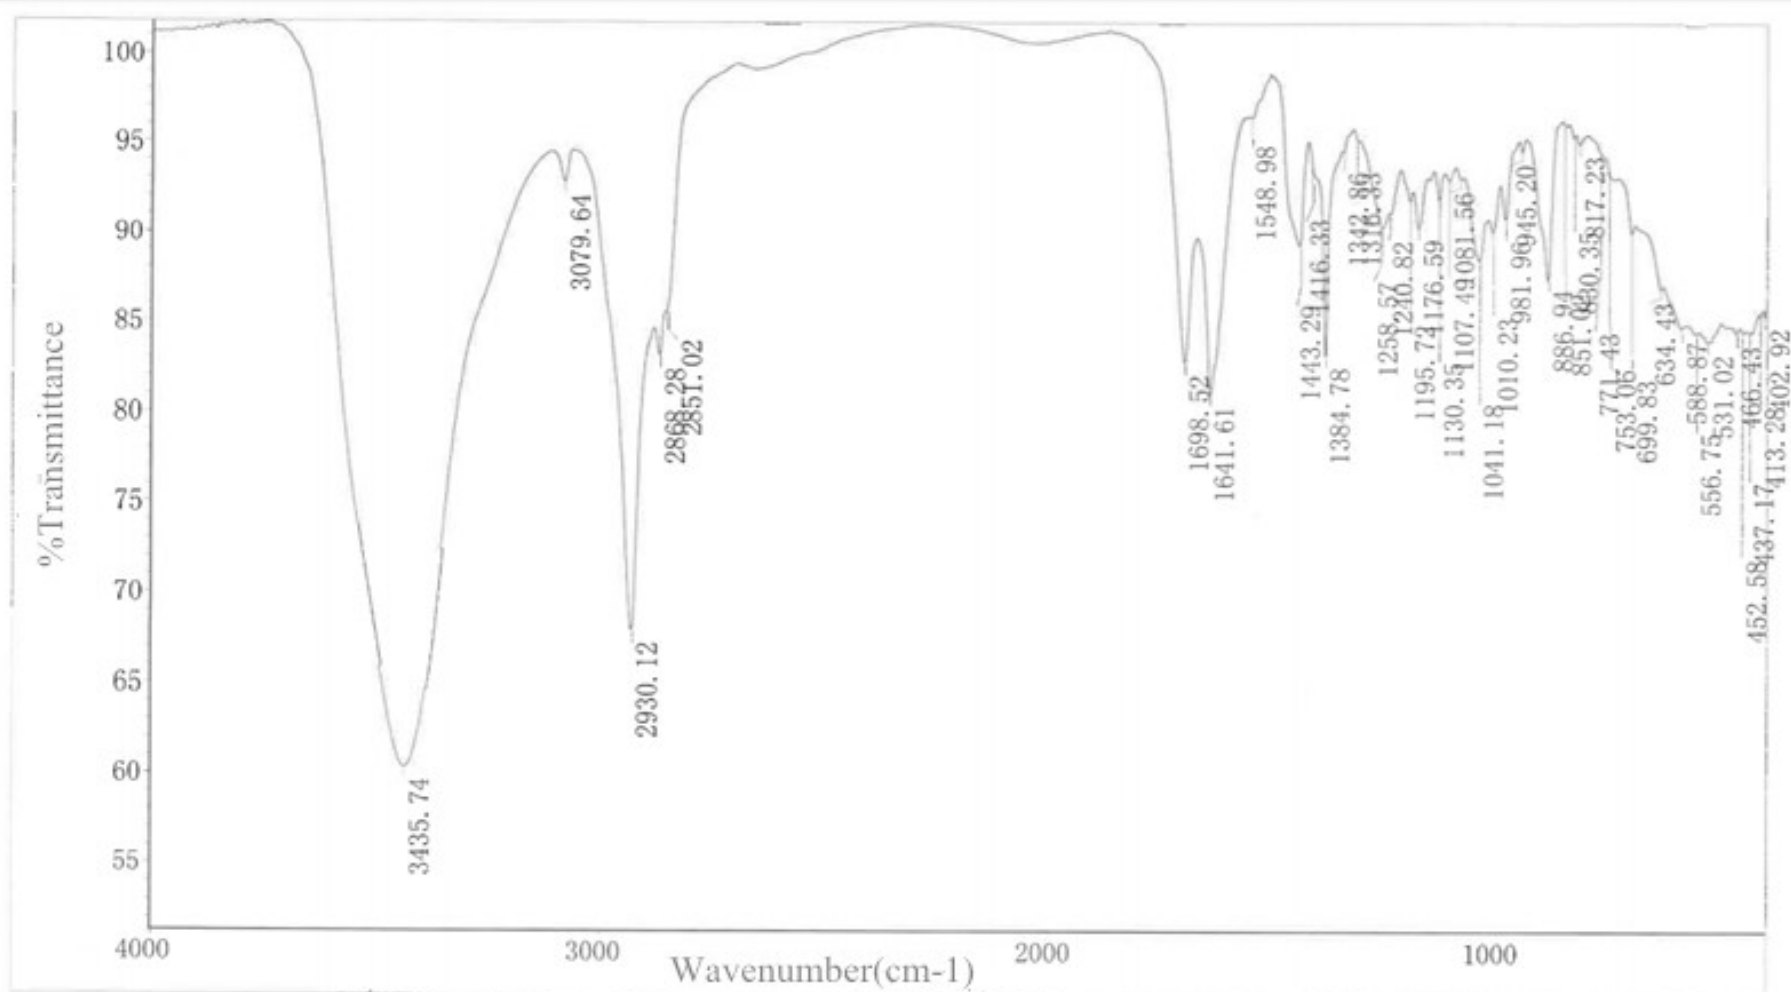

**Figure S29.**  $^1\text{H}$  NMR (800 MHz) spectrum of cunlanceloic acid C (**3**) in pyridine- $d_5$ .

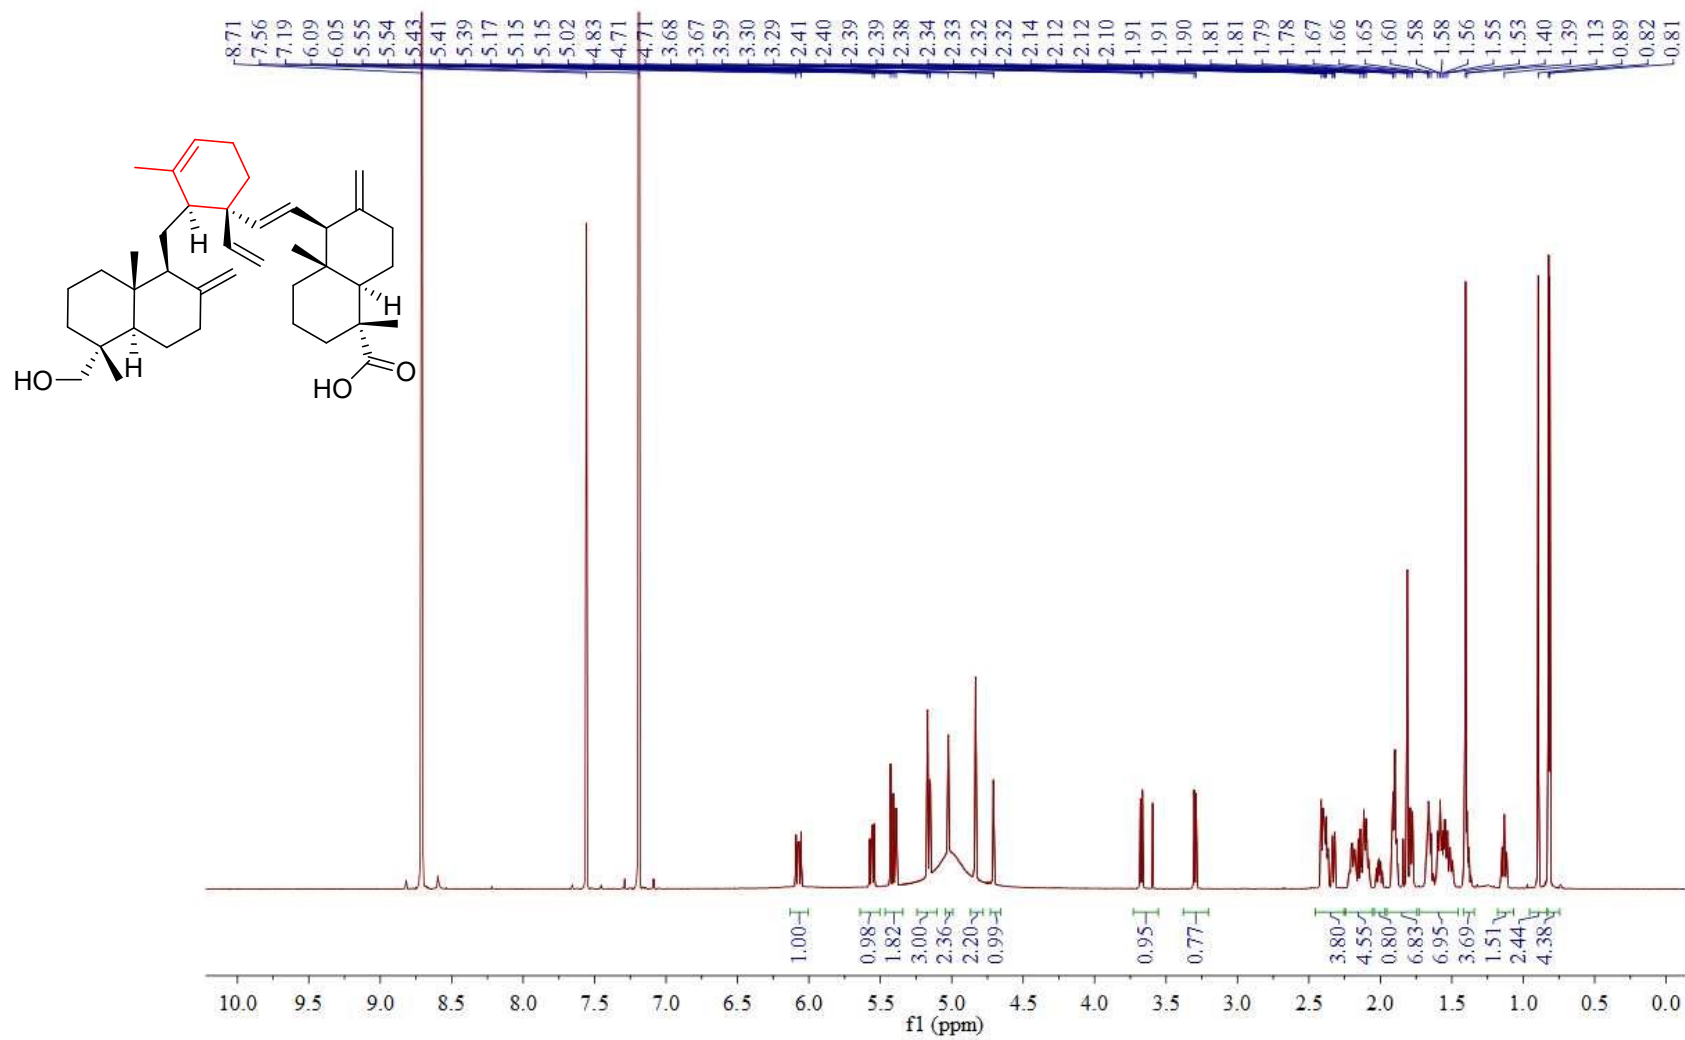

**Figure S30.** Expanded  $^1\text{H}$  NMR spectrum of cunlanceloic acid C (**3**).

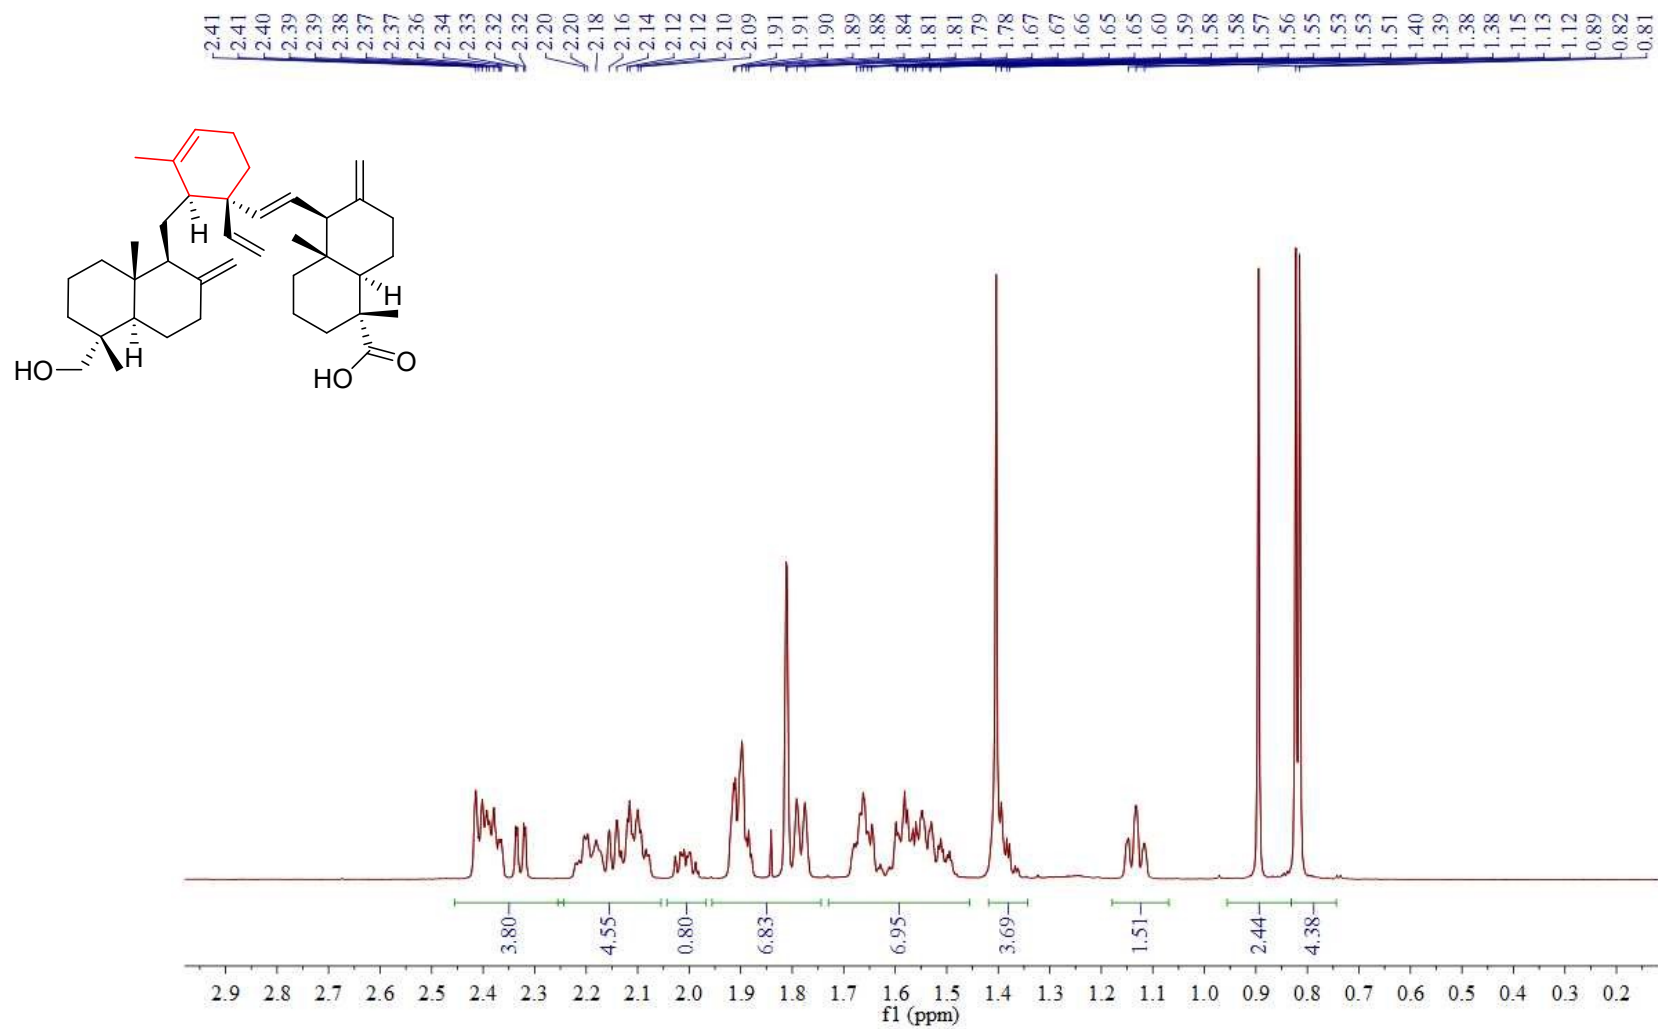

**Figure S31.**  $^{13}\text{C}$  NMR and DEPT (200 MHz) spectra of cunlanceloic acid C (**3**) in pyridine- $d_5$ .

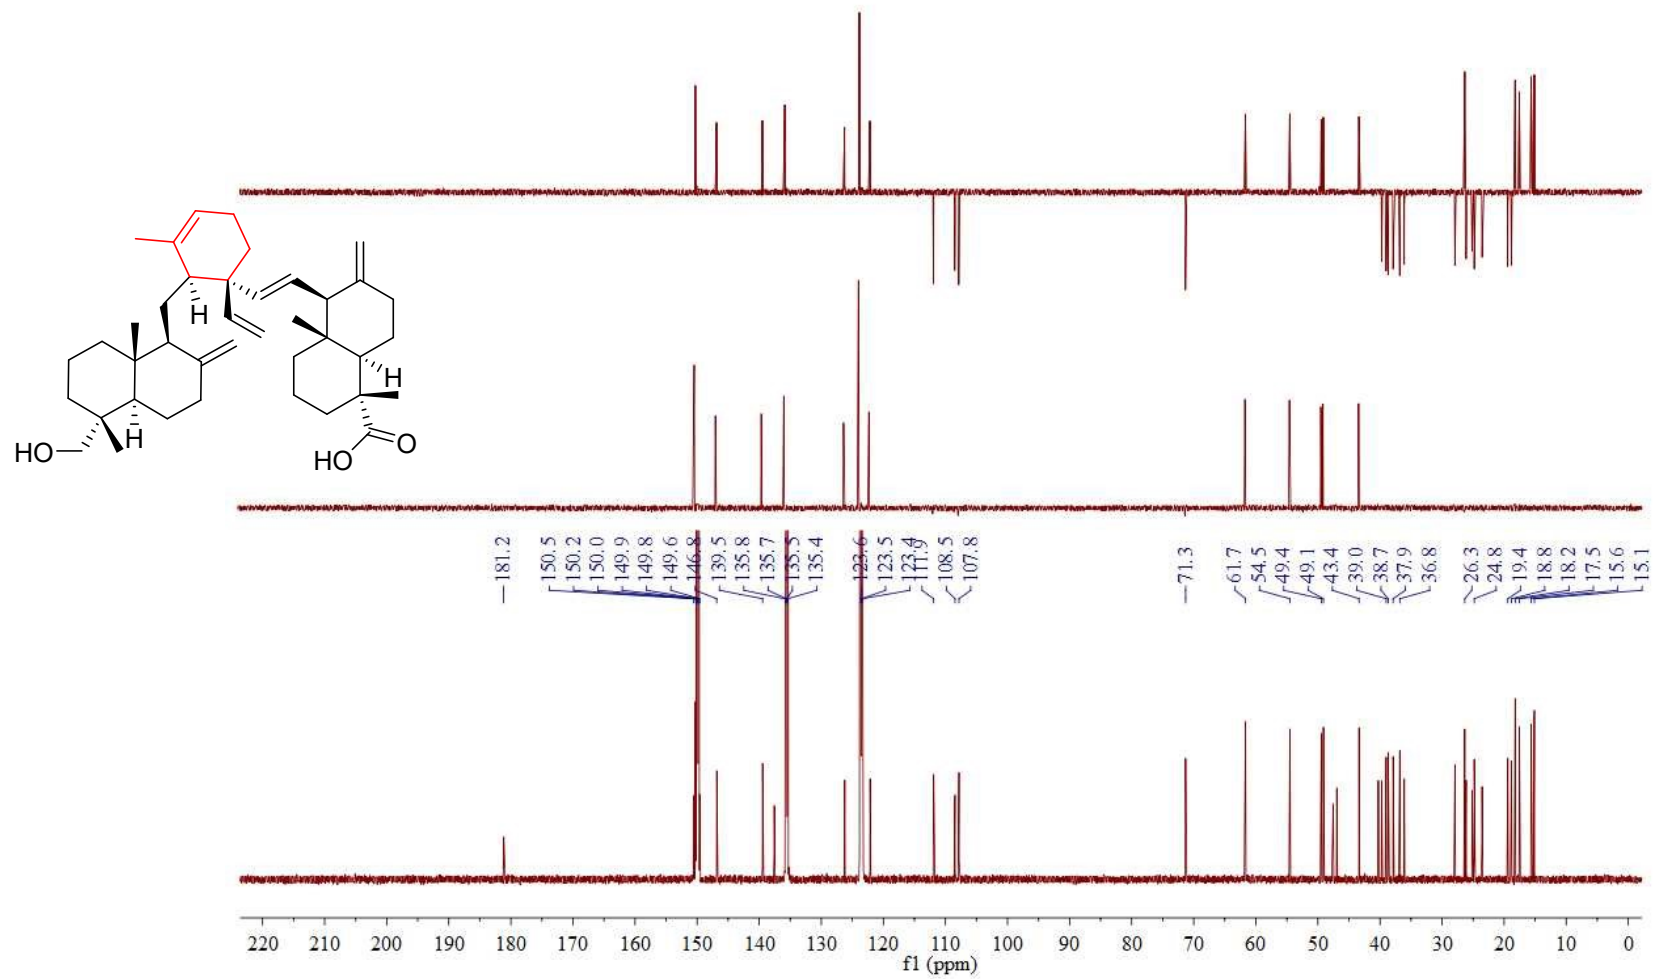

Figure S32. HSQC spectrum of cunlanceloic acid C (3).

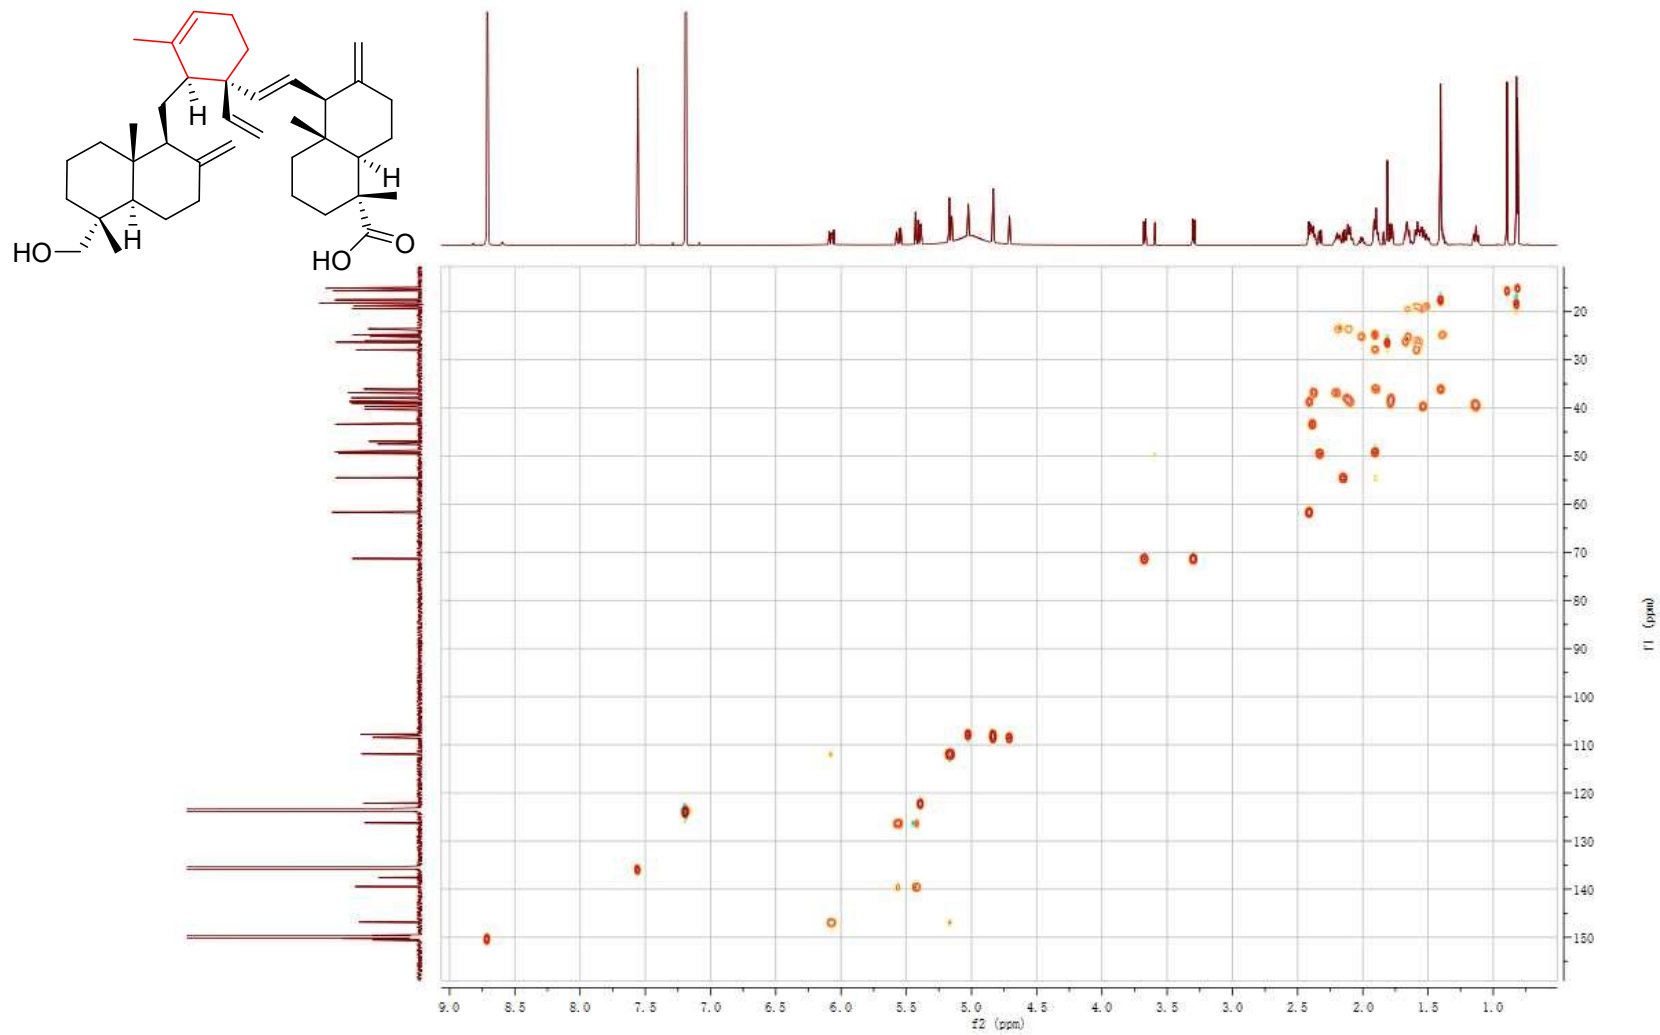

**Figure S33.** Expanded HSQC spectrum of cunlanceloic acid C (**3**).

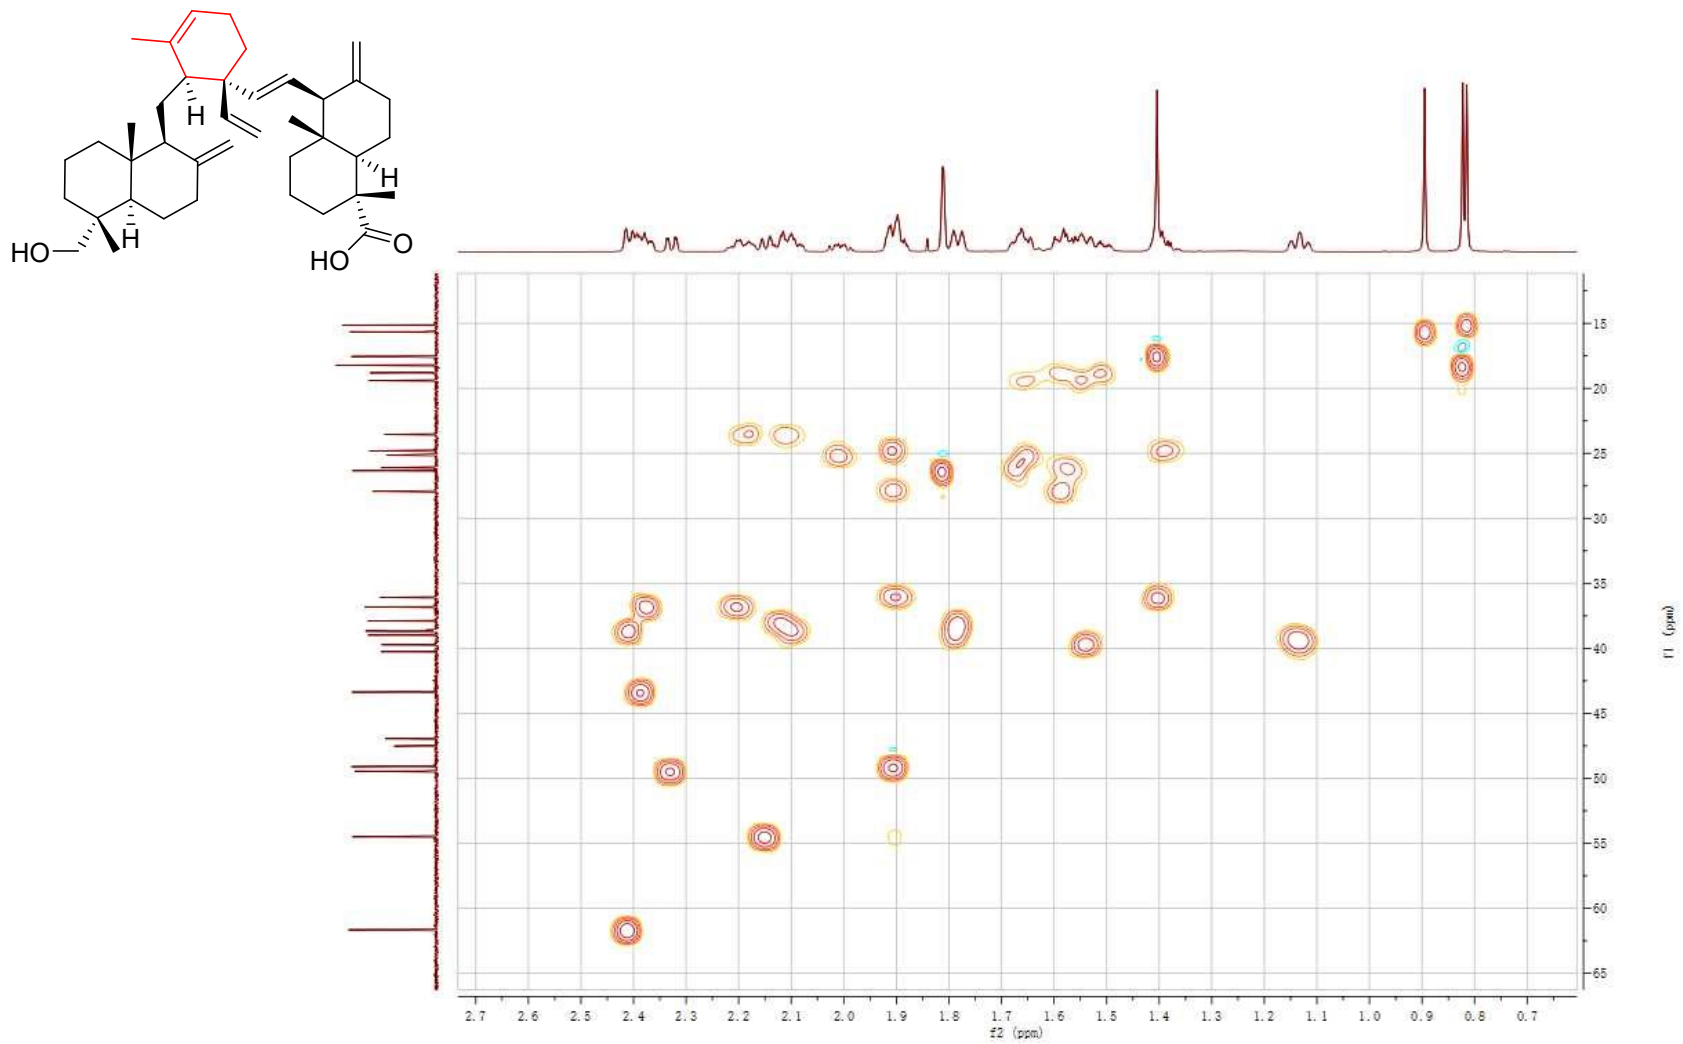



Figure S34.  $^1\text{H}$ - $^1\text{H}$  COSY spectrum of cunlanceloic acid C (3).

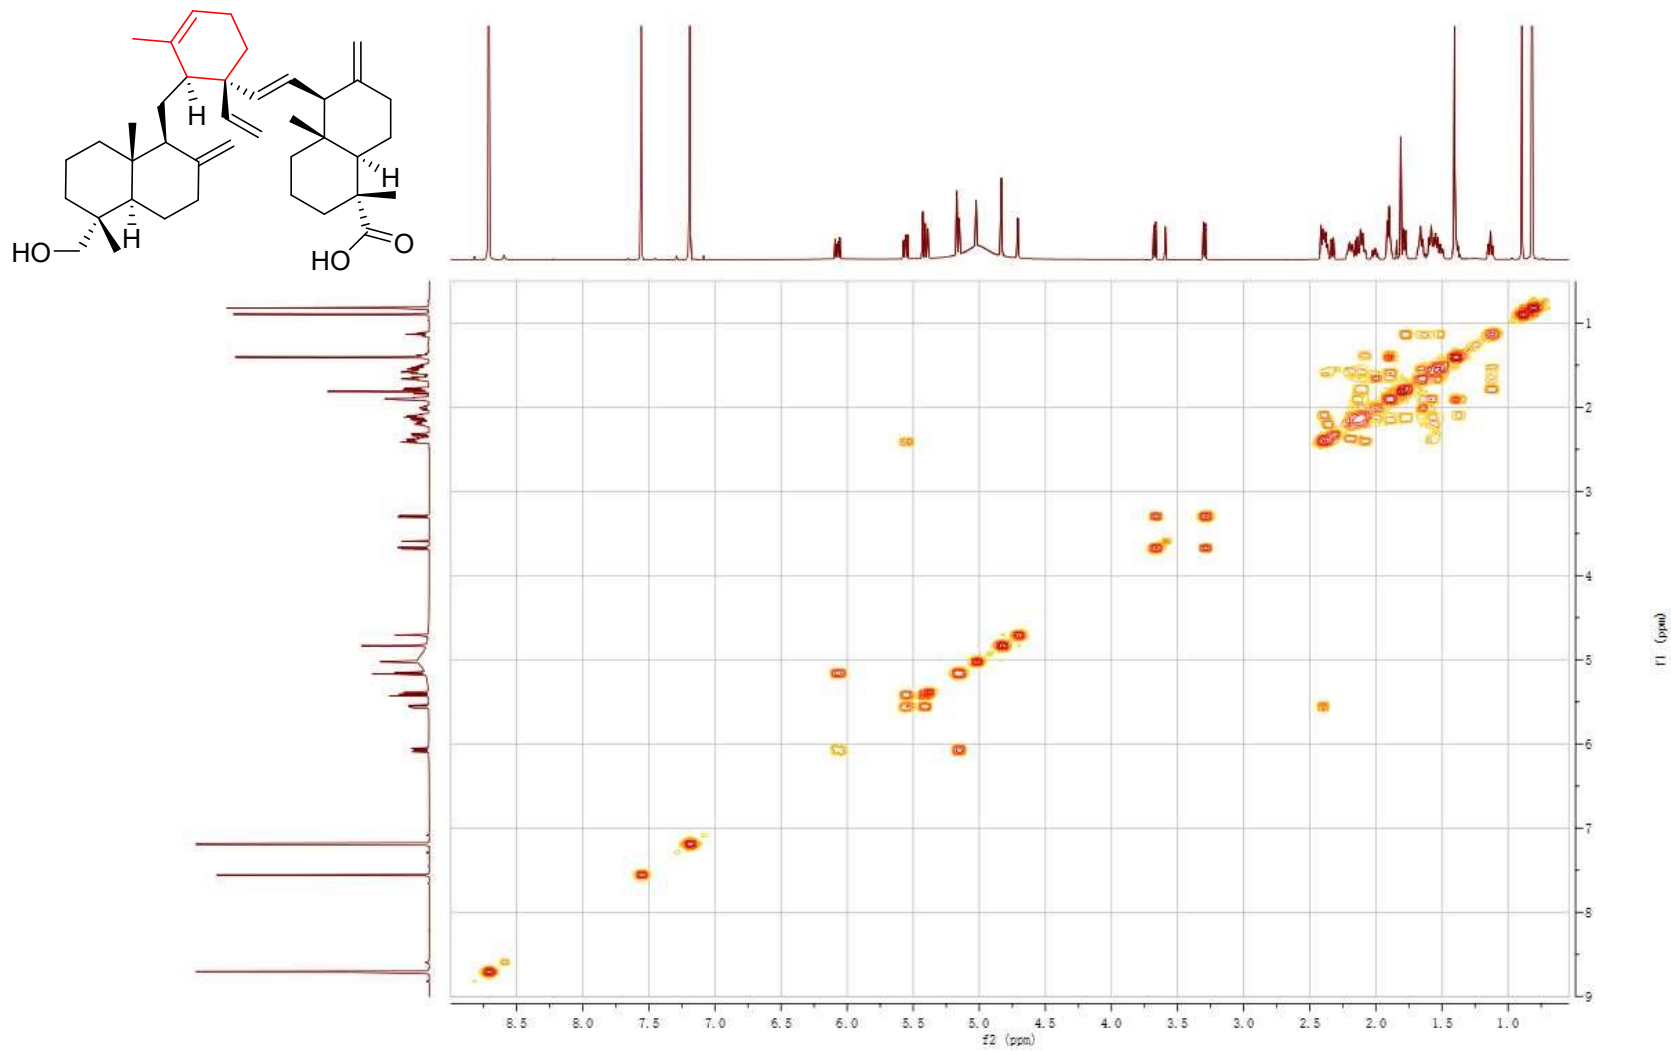

**Figure S35.** Expanded  $^1\text{H}$ - $^1\text{H}$  COSY spectrum of cunlanceloic acid C (**3**).

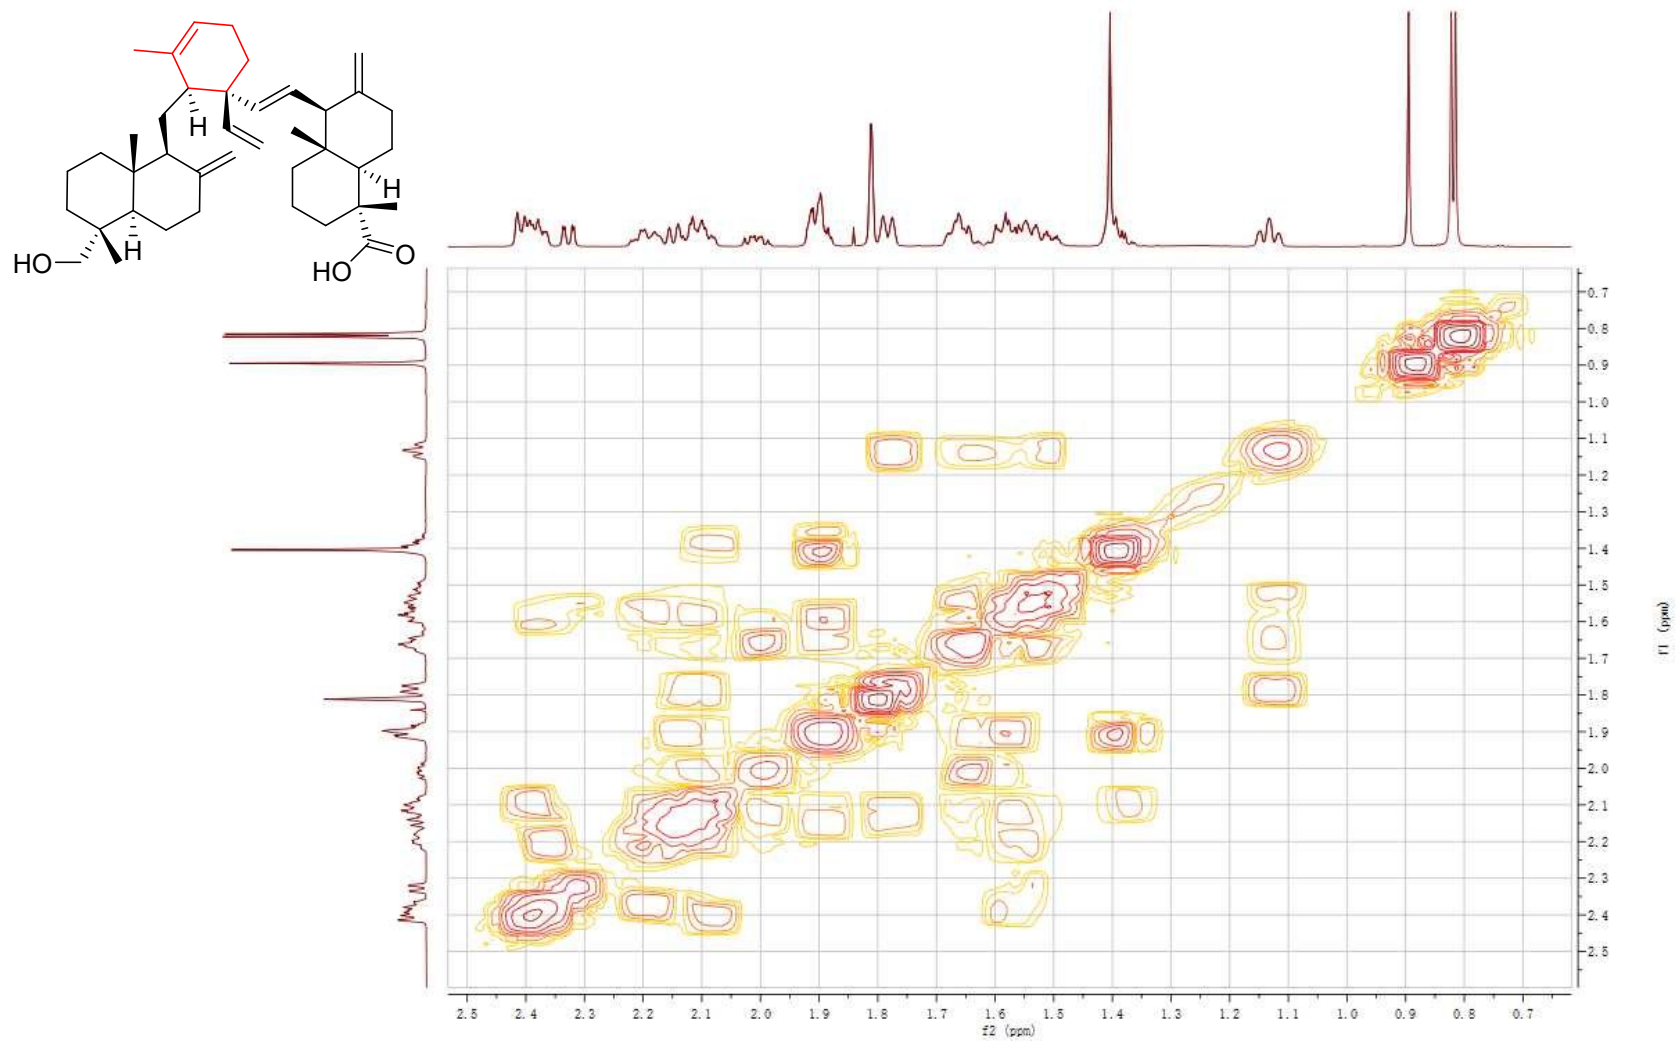

Figure S36. HMBC spectrum of cunlanceloic acid C (3).

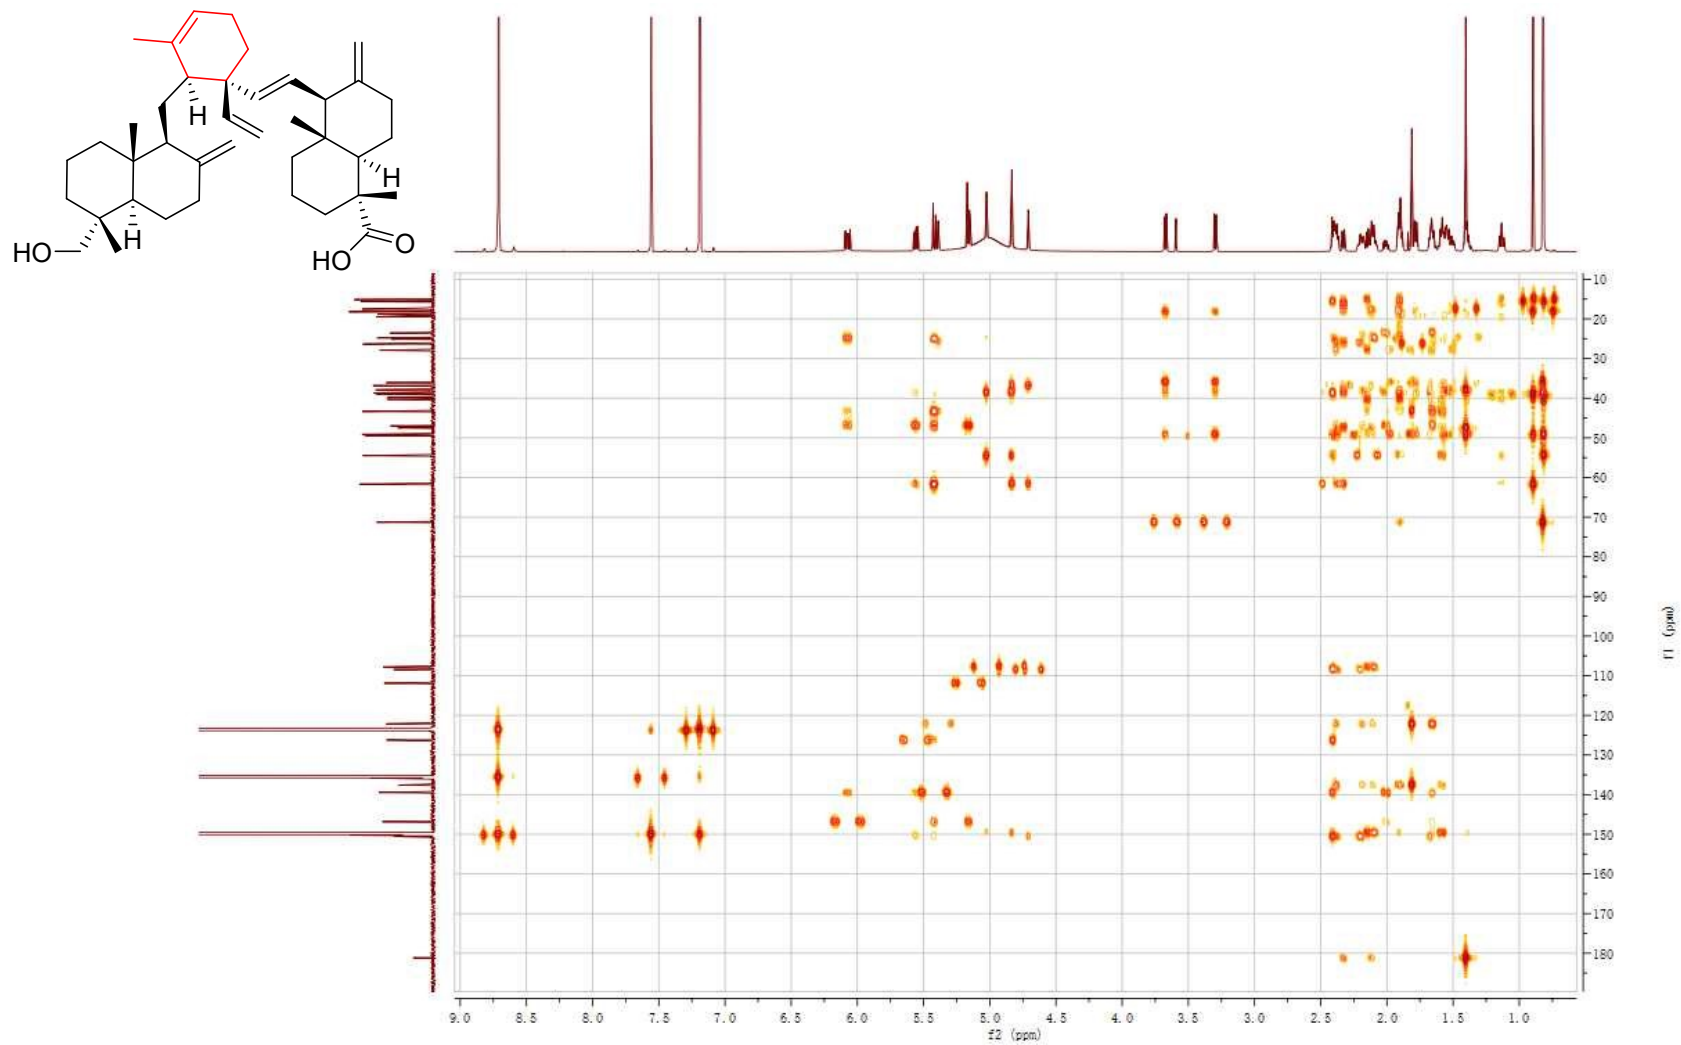

Figure S37. Expanded HMBC spectrum of cunlanceloic acid C (3).

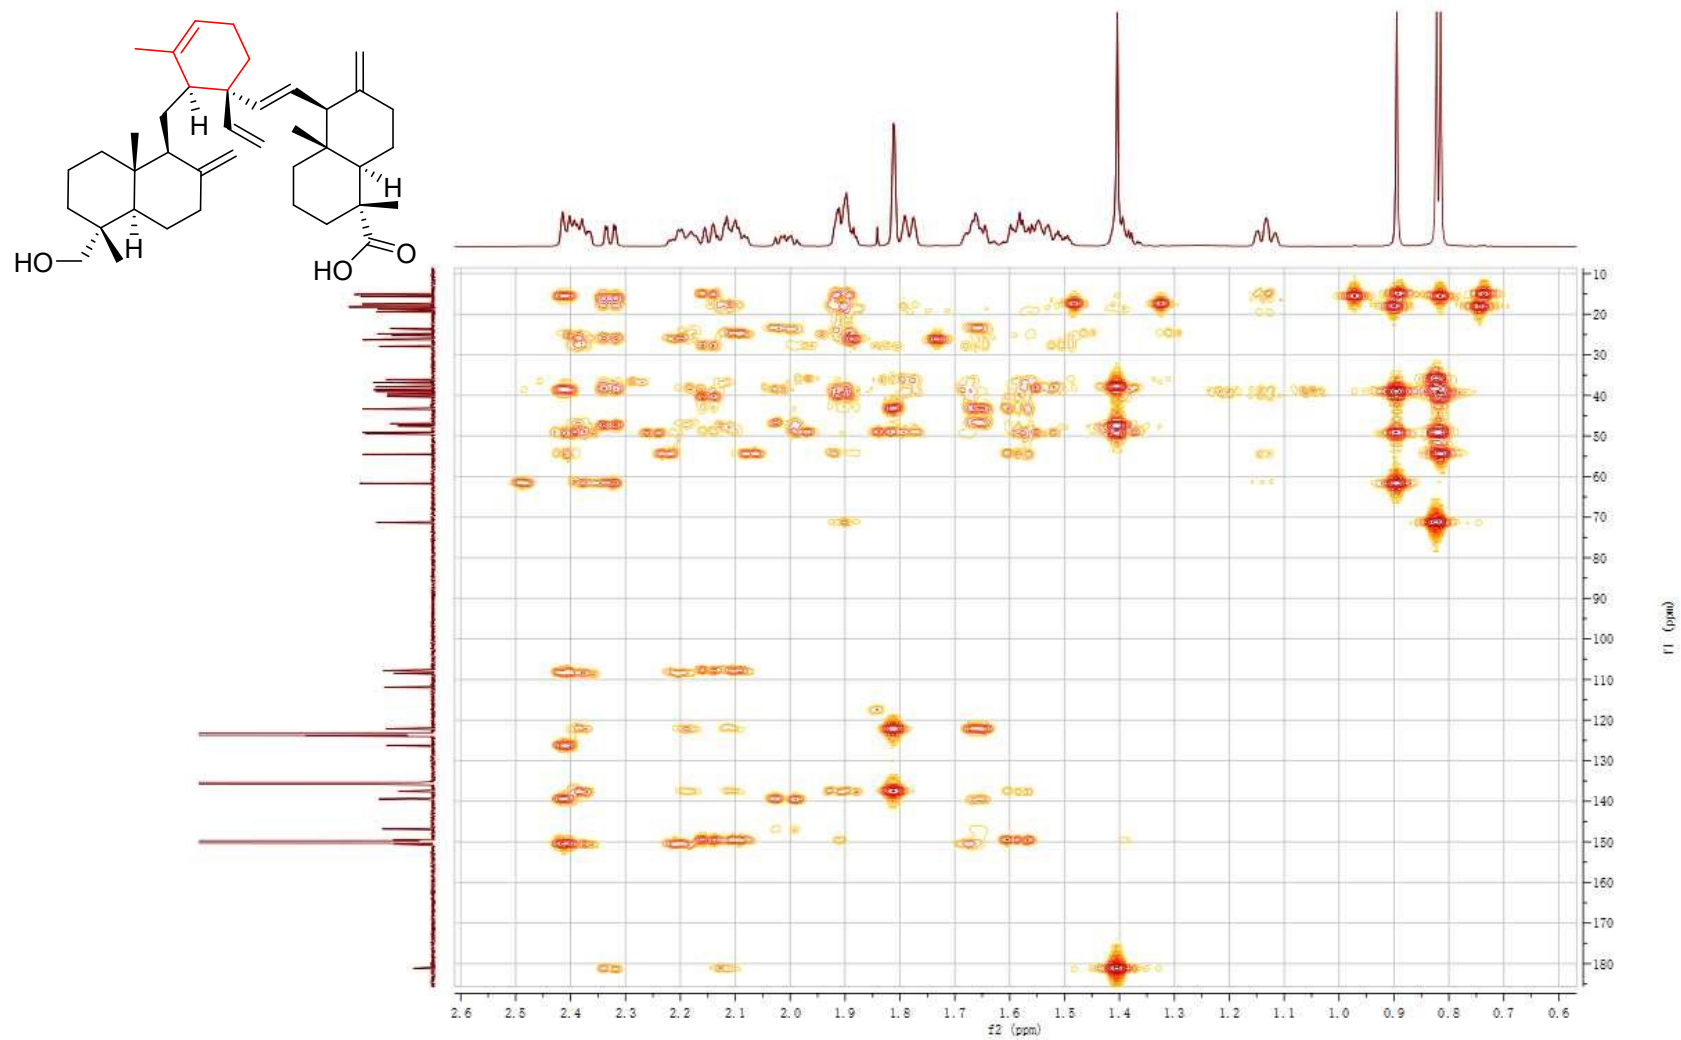

Figure S38. ROESY spectrum of cunlanceloic acid C (3).

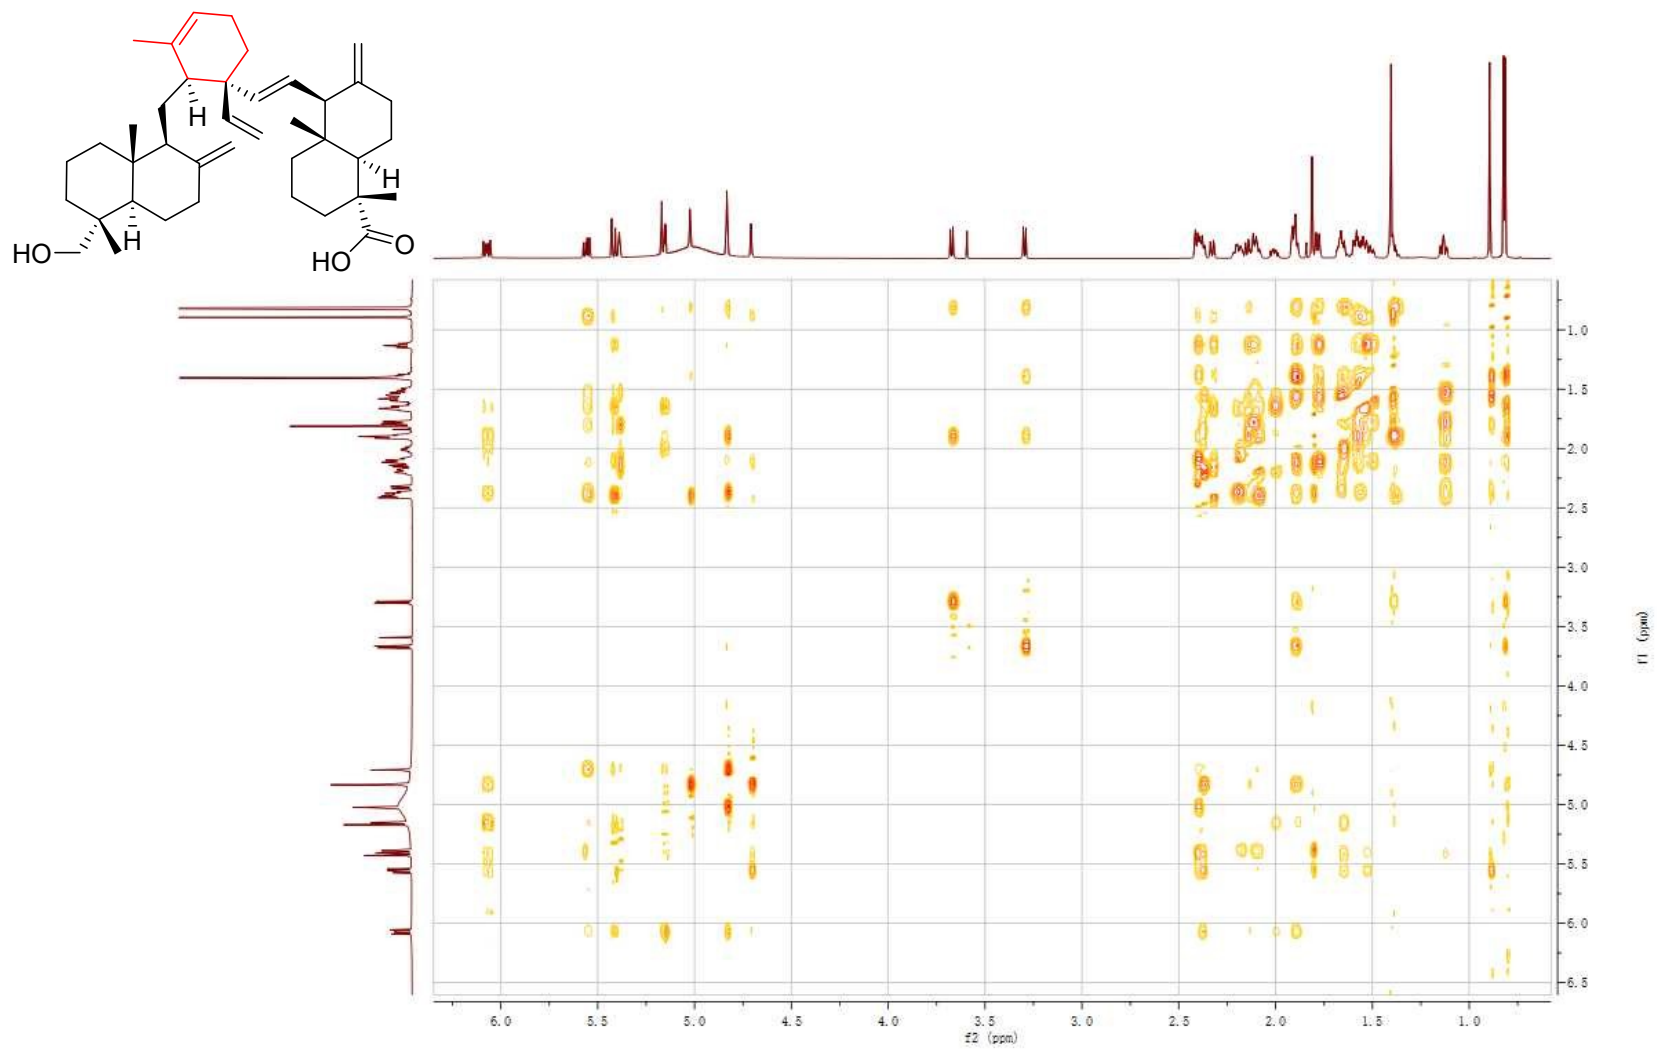

**Figure S39.** Expanded ROESY spectrum of cunlanceloic acid C (**3**).

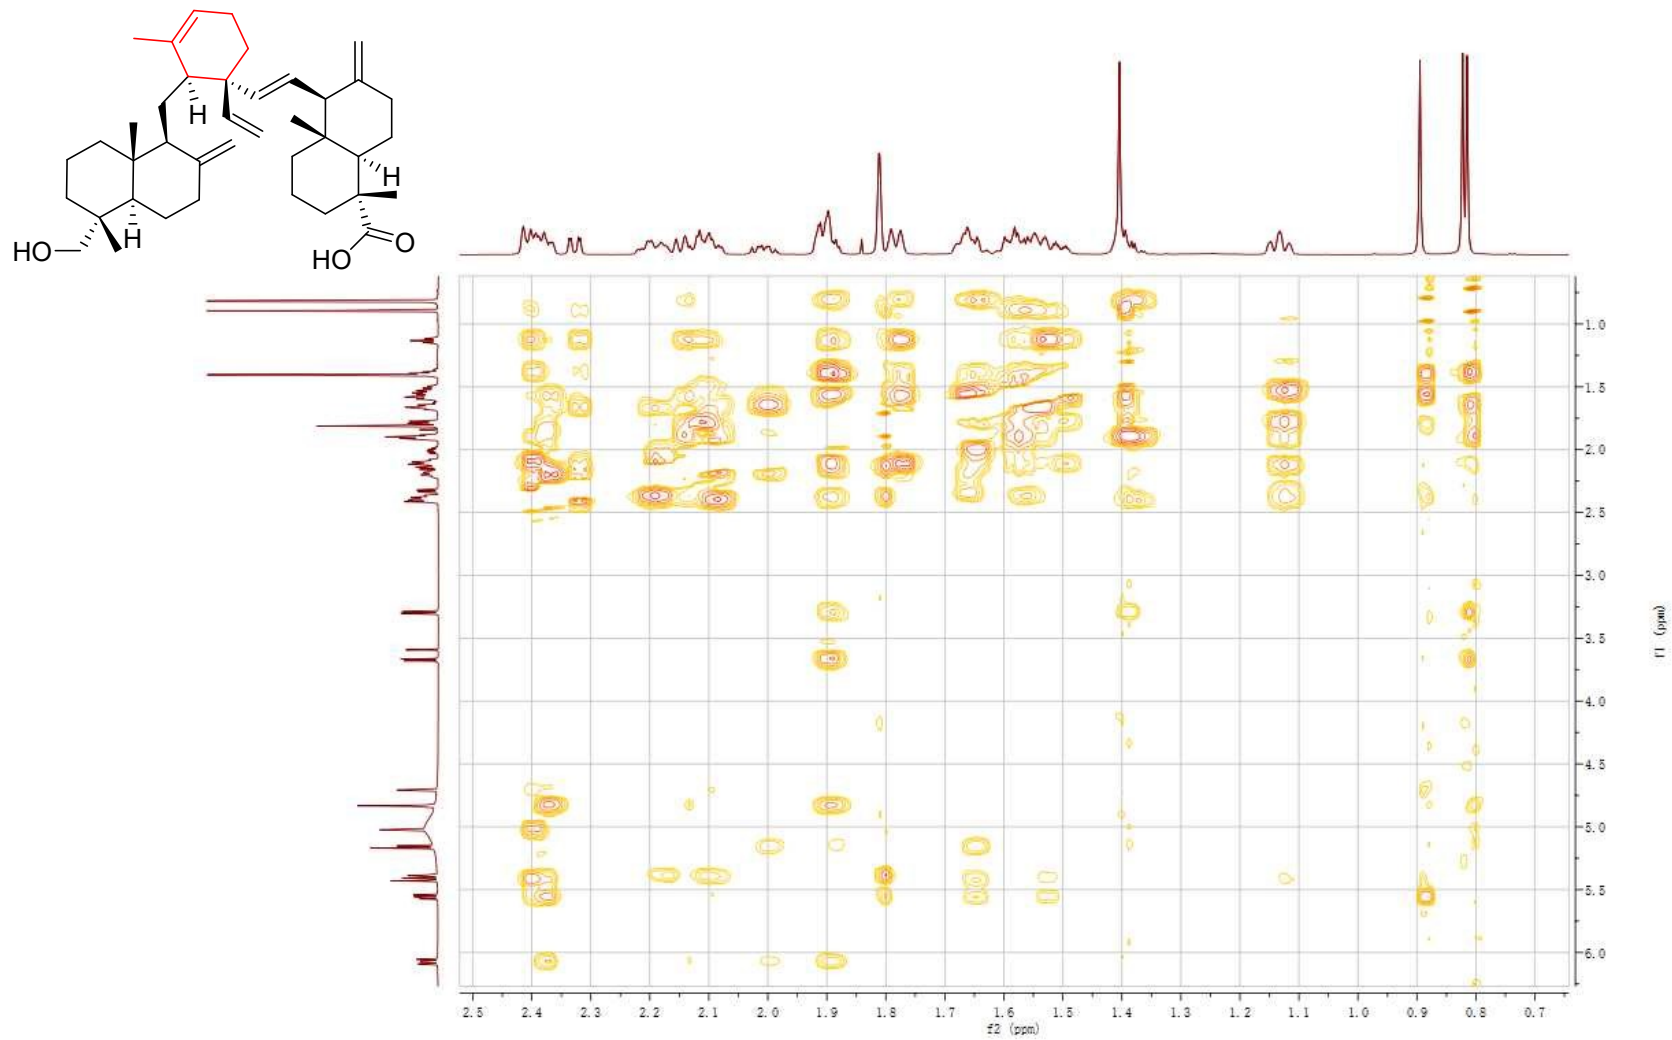

**Figure S40.** ESIMS spectrum of cunlanceloic acid C (**3**).

Retention Time:0.427(Scan#:66)

Spectrum:Averaged 0.360-0.493(56-76)

Background:Averaged 0.000-0.304(2-48) MS Stage:MS Polarity:Neg Segment1 - Event2 Precursor:----- Cutoff:

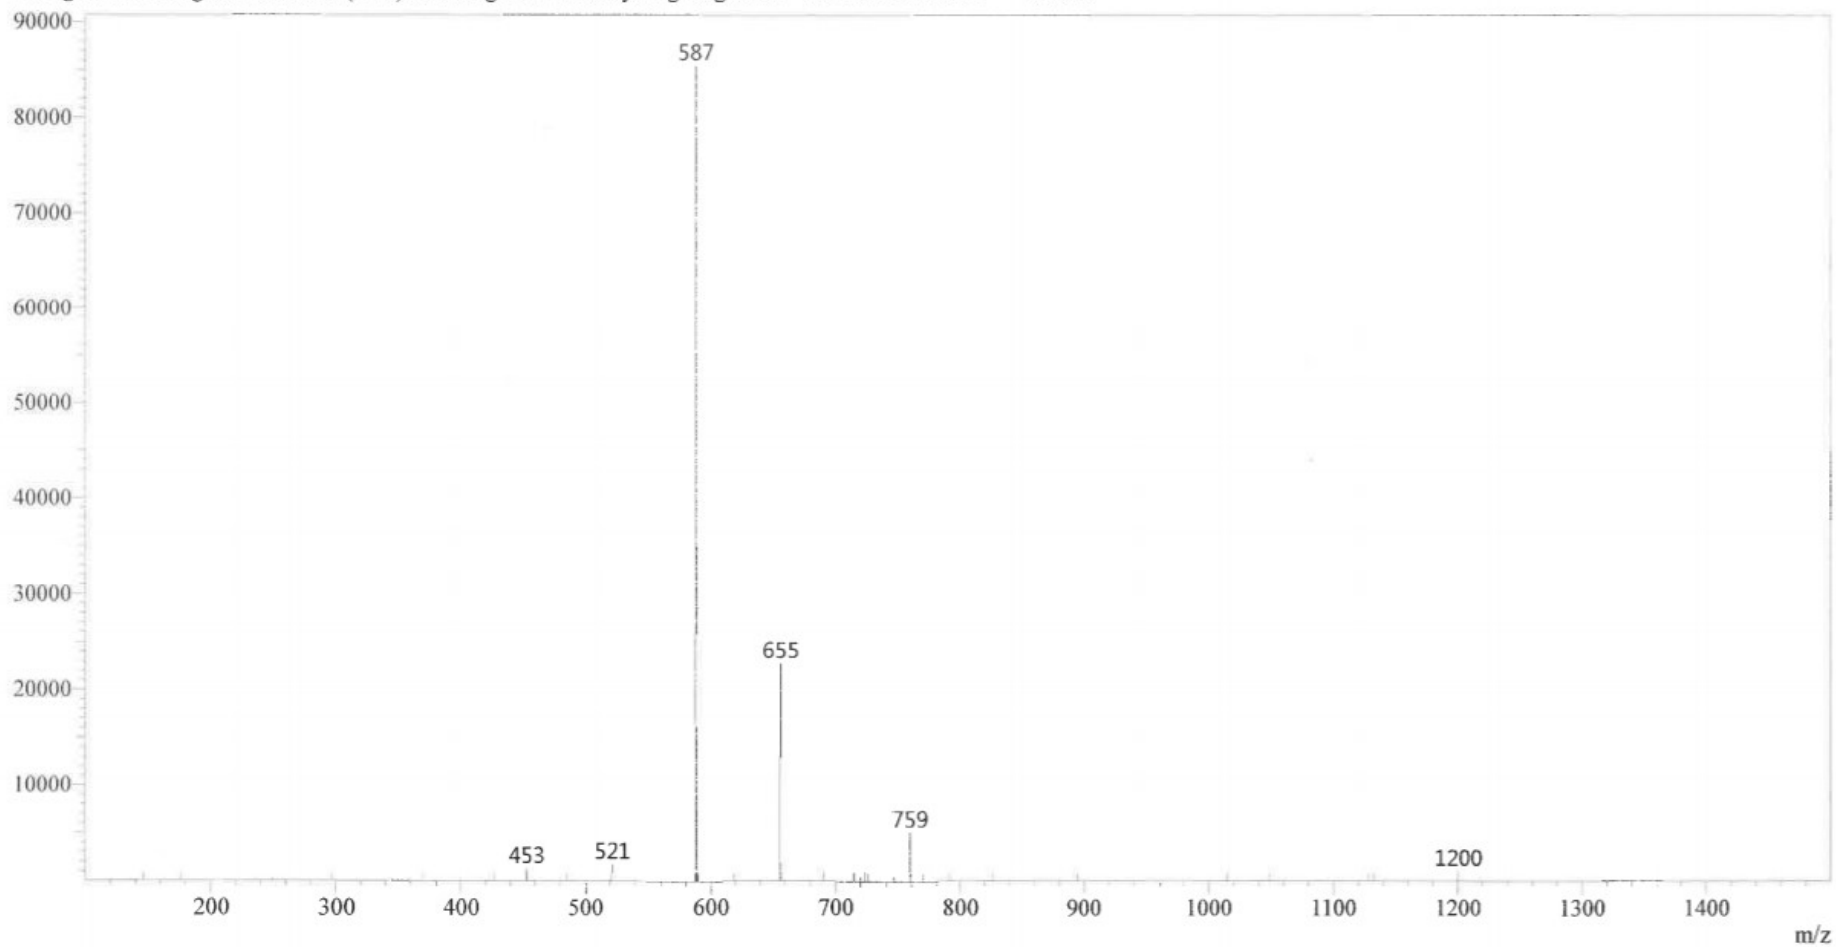

Data File: E:\DATA\2019\0924\1\FWF-199a.lcd

Figure S41. HRES

| Elmt | Val. | Min | Max | Use Adduct |
|------|------|-----|-----|------|------|-----|-----|------|------|-----|-----|------|------|-----|-----|------------|
| H    | 1    | 2   | 100 | F    | 1    | 0   | 0   | S    | 2    | 0   | 0   | Pd   | 2    | 0   | 0   | H          |
| 2H   | 1    | 0   | 0   | Na   | 1    | 0   | 0   | Cl   | 1    | 0   | 0   | Ag   | 1    | 0   | 0   | HCOO       |
| C    | 4    | 10  | 50  | Mg   | 2    | 0   | 0   | Cu   | 2    | 0   | 0   | I    | 3    | 0   | 0   | Cl         |
| N    | 3    | 0   | 0   | Si   | 4    | 0   | 0   | Se   | 2    | 0   | 0   |      |      |     |     |            |
| O    | 2    | 0   | 30  | P    | 3    | 0   | 0   | Br   | 1    | 0   | 0   |      |      |     |     |            |

Error Margin (ppm): 5  
 DBE Range: -2.0 - 100.0  
 Electron Ions: both  
 HC Ratio: unlimited  
 Apply N Rule: yes  
 Use MSn Info: yes  
 Max Isotopes: all  
 Isotope RI (%): 1.00  
 MSn Iso RI (%): 75.00  
 MSn Logic Mode: OR  
 Isotope Res: 10000  
 Max Results: 10

Event#: 2 MS(E-) Ret. Time : 0.467 Scan#: 72

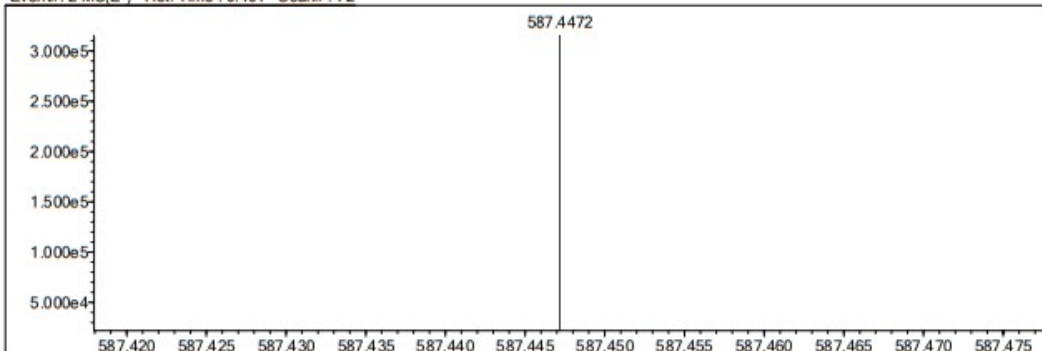

Measured region for 587.4472 m/z

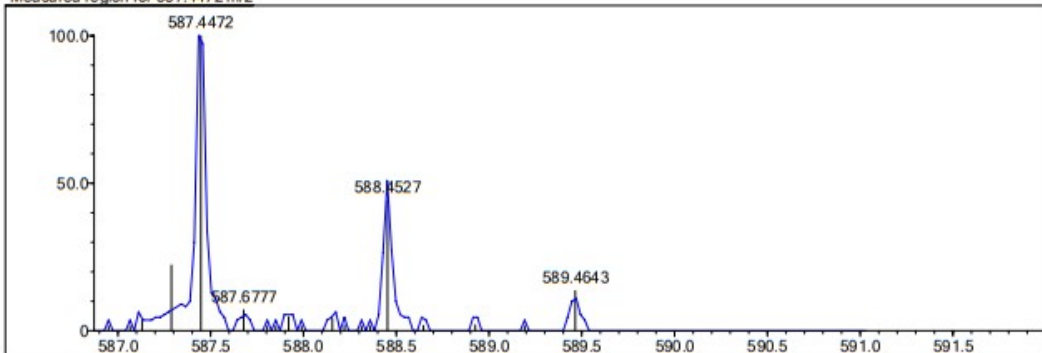

C40 H60 O3 [M-H]- : Predicted region for 587.4470 m/z

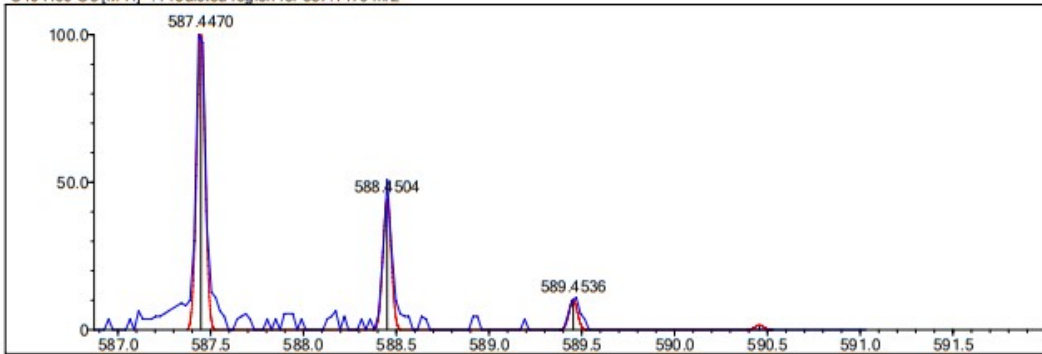

| Formula (M) | Ion    | Meas. m/z | Pred. m/z | Df. (mDa) | Df. (ppm) | DBE  |
|-------------|--------|-----------|-----------|-----------|-----------|------|
| C40 H60 O3  | [M-H]- | 587.4472  | 587.4470  | 0.2       | 0.34      | 11.0 |



Figure S42. IR spectrum of cunlanceloic acid C (3).

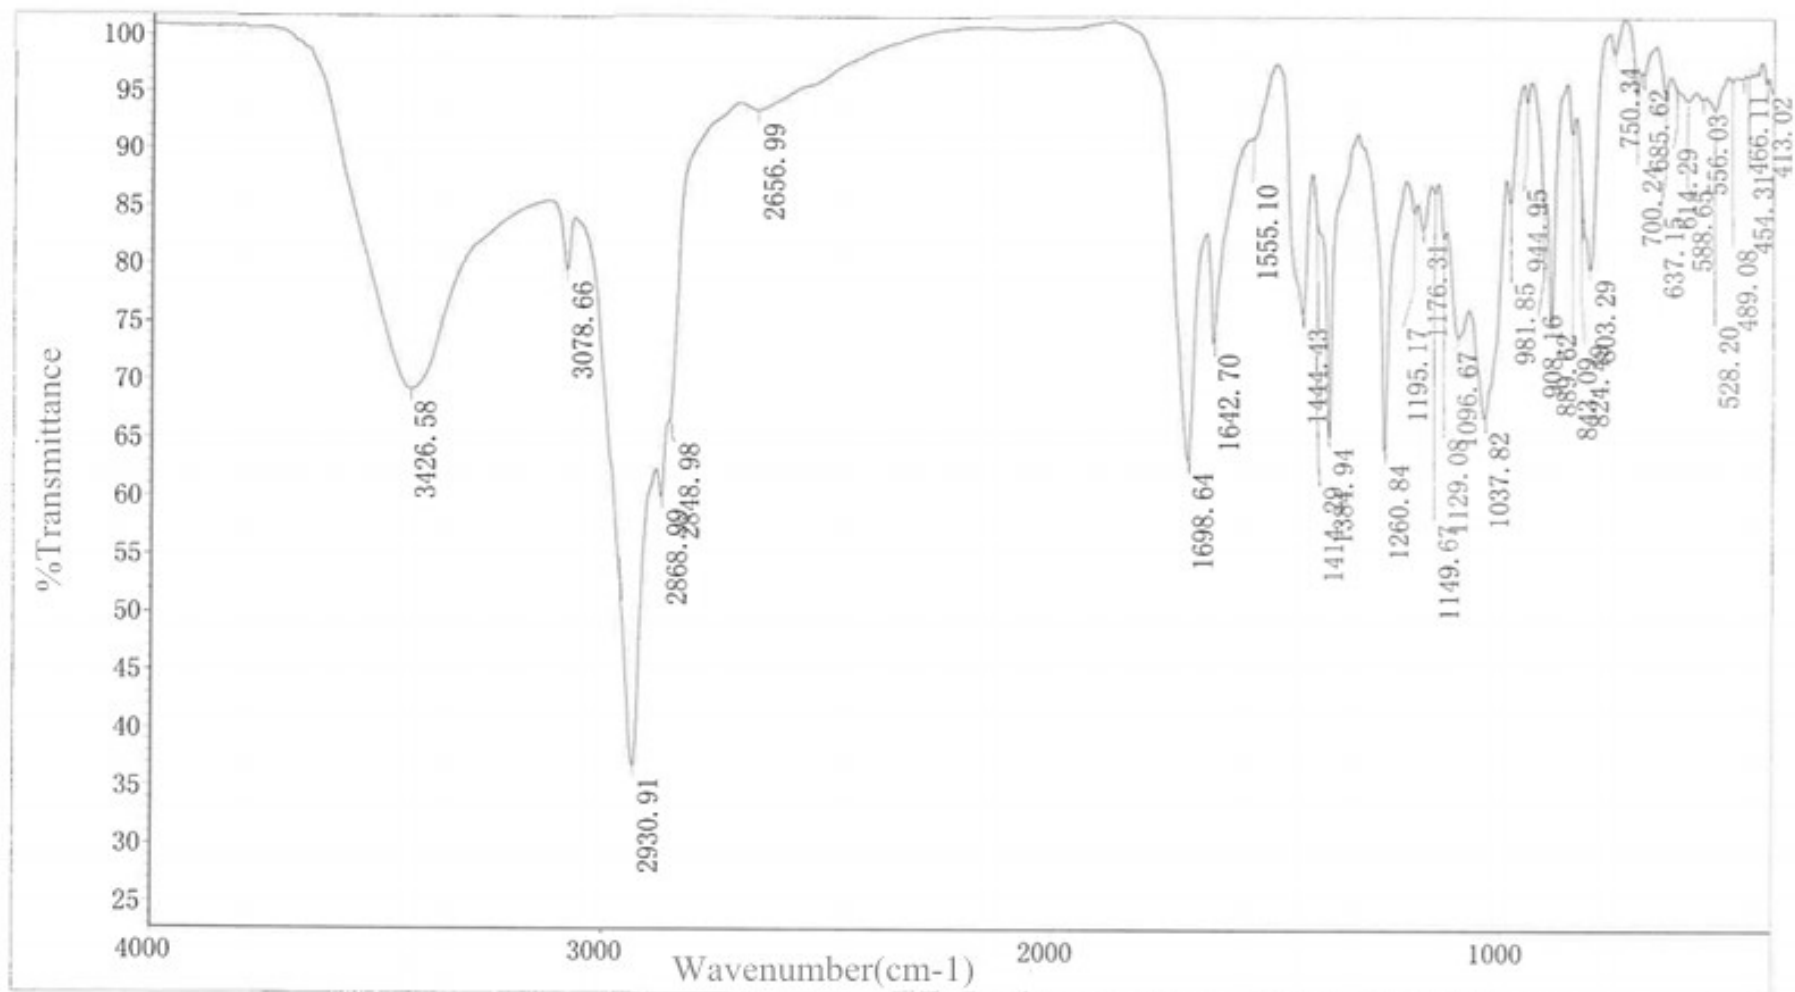

**Figure S43.**  $^1\text{H}$  NMR (800 MHz) spectrum of cunlanceloic acid D (**4**) in pyridine- $d_5$ .

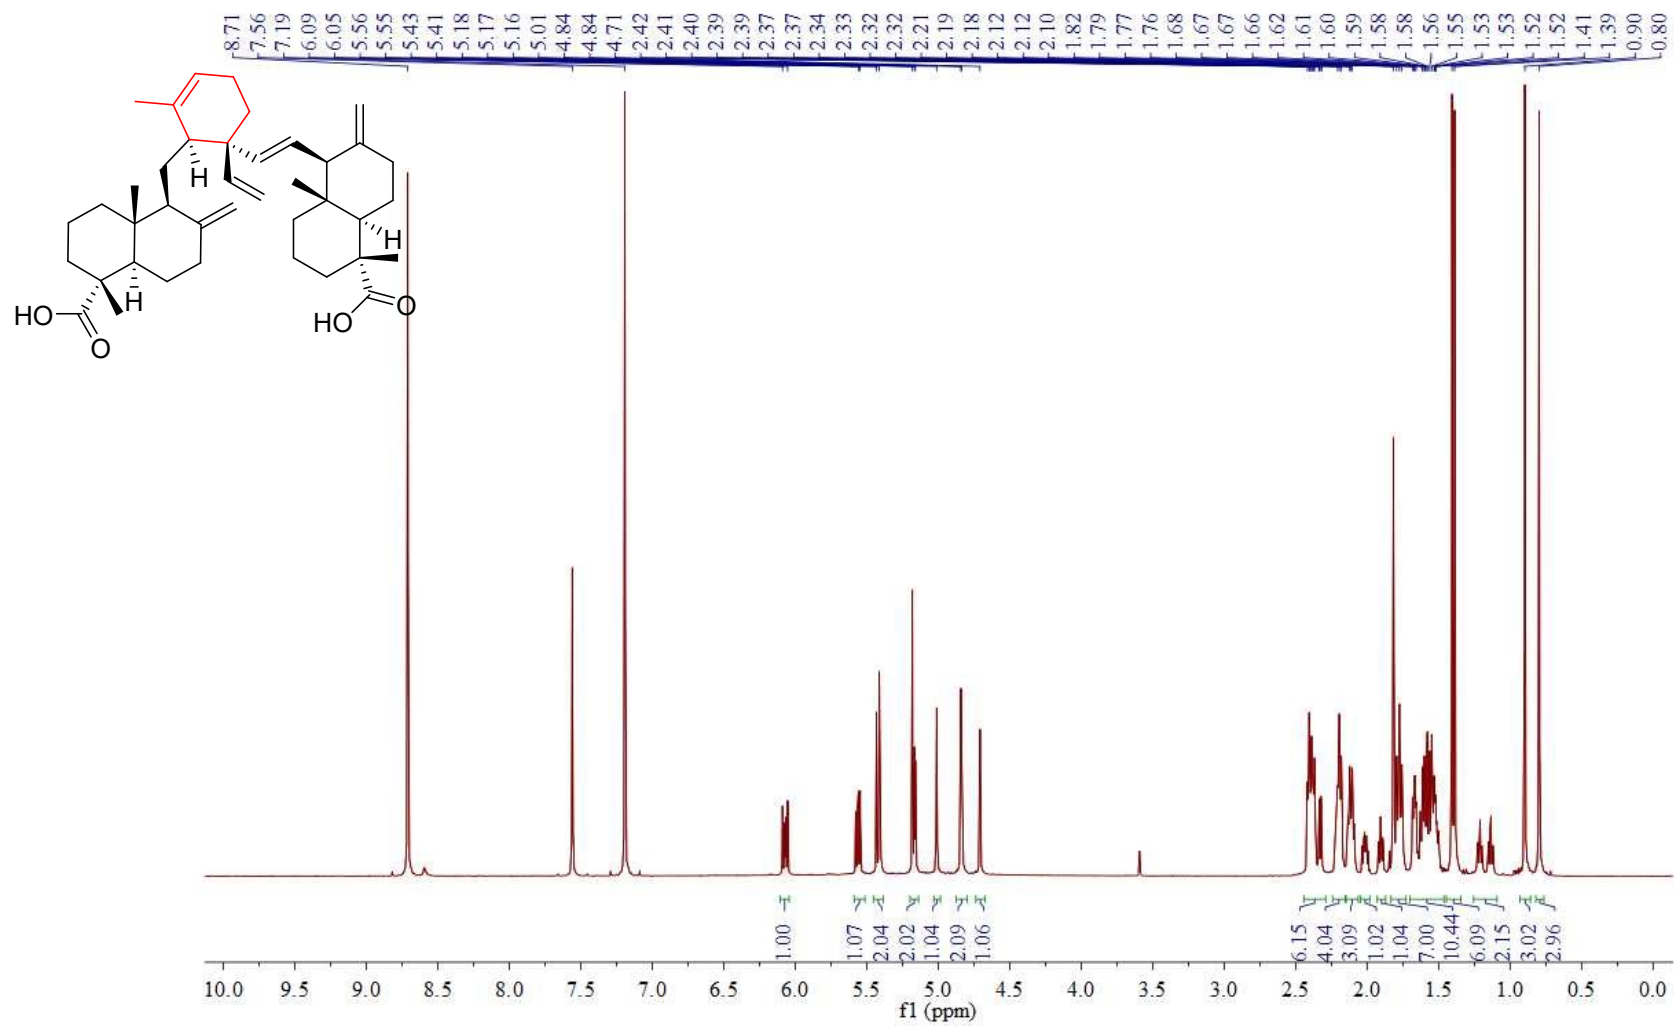

**Figure S44.** Expanded  $^1\text{H}$  NMR spectrum of cunlanceloic acid D (**4**).

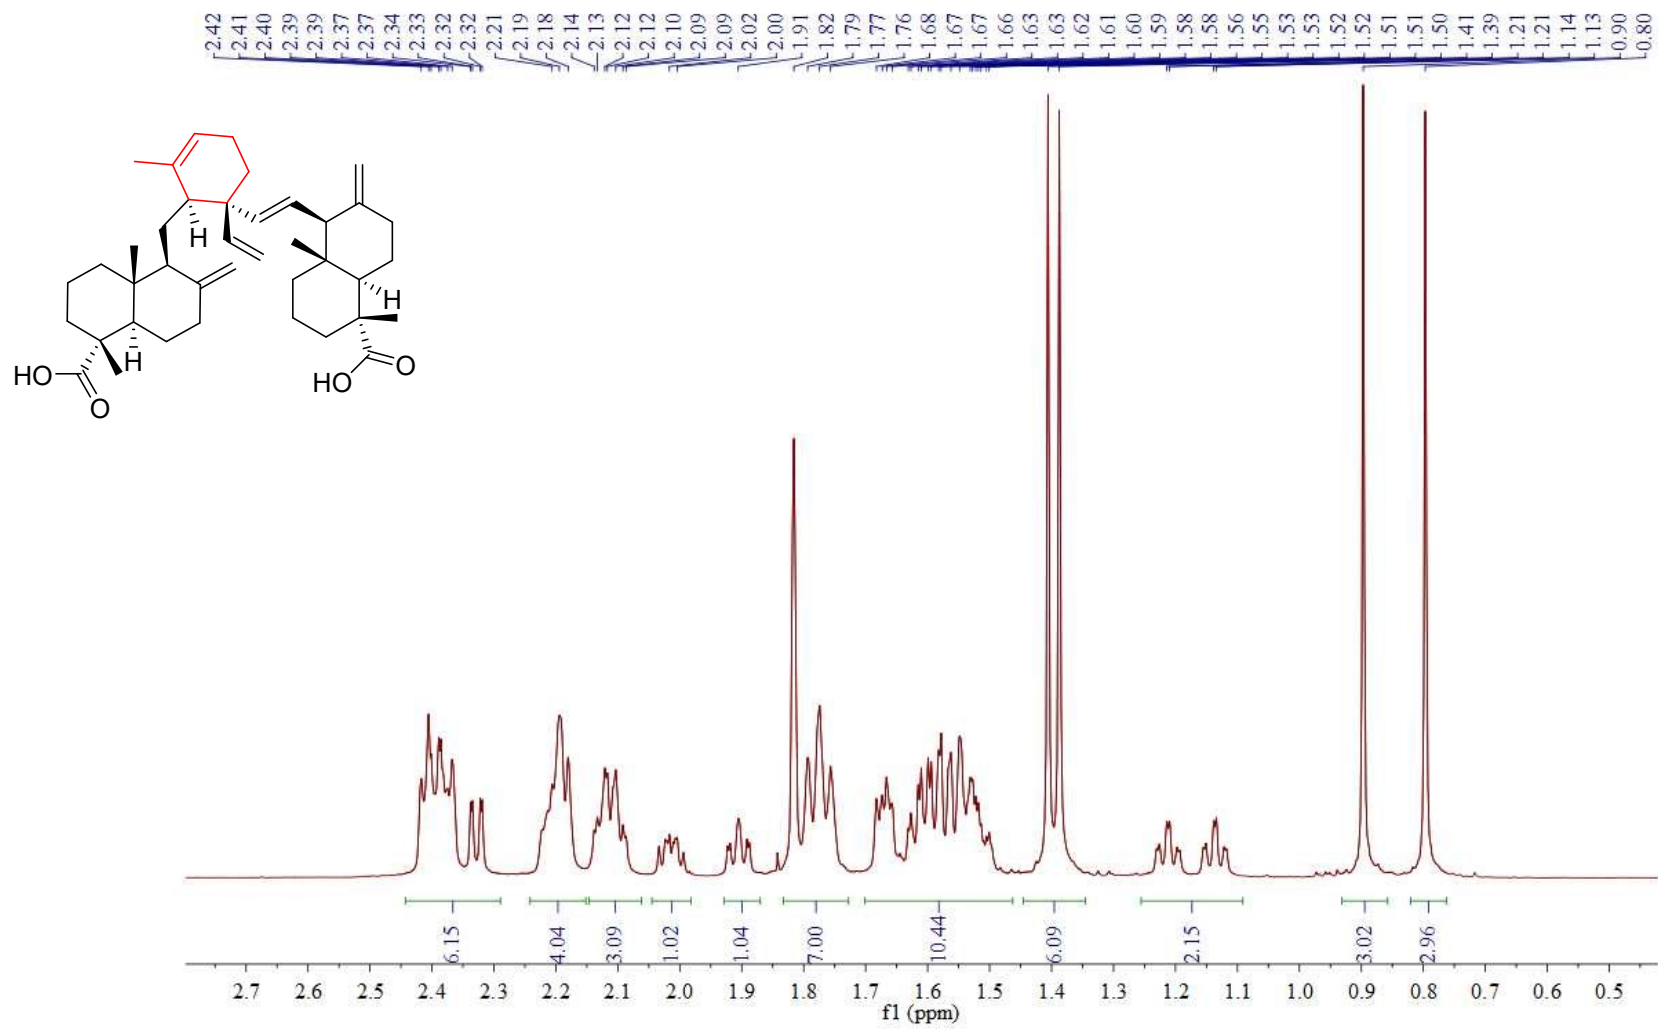

**Figure S45.**  $^{13}\text{C}$  NMR and DEPT (200 MHz) spectra of cunlanceloic acid D (**4**) in pyridine- $d_5$ .

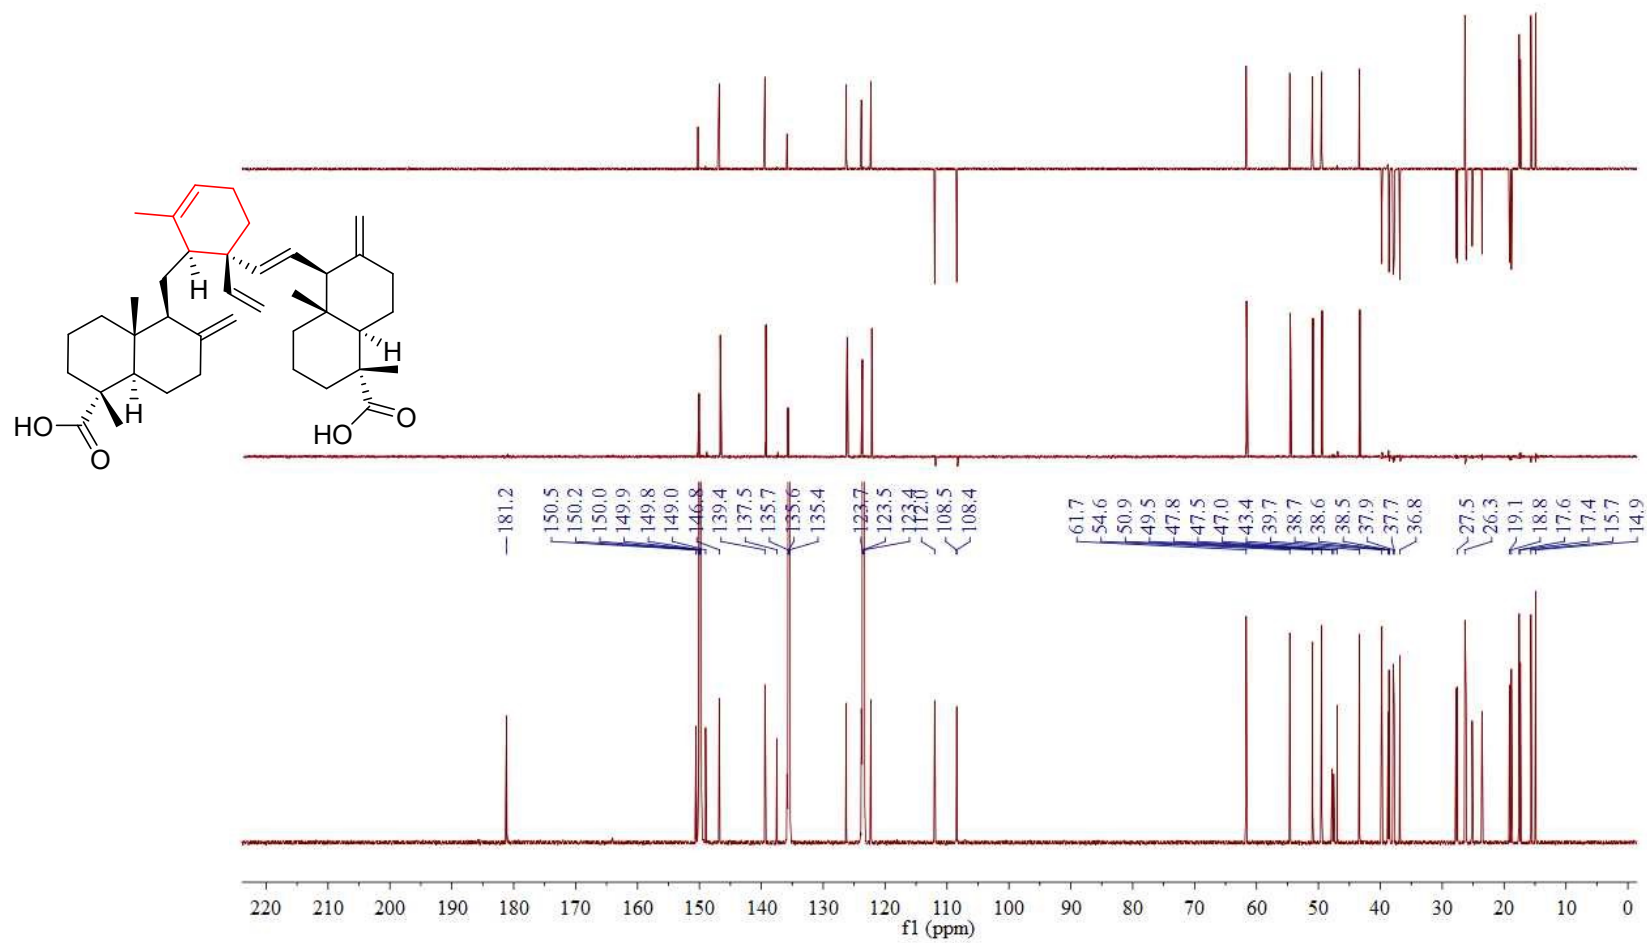

Figure S46. HSQC spectrum of cunlanceloic acid D (4).

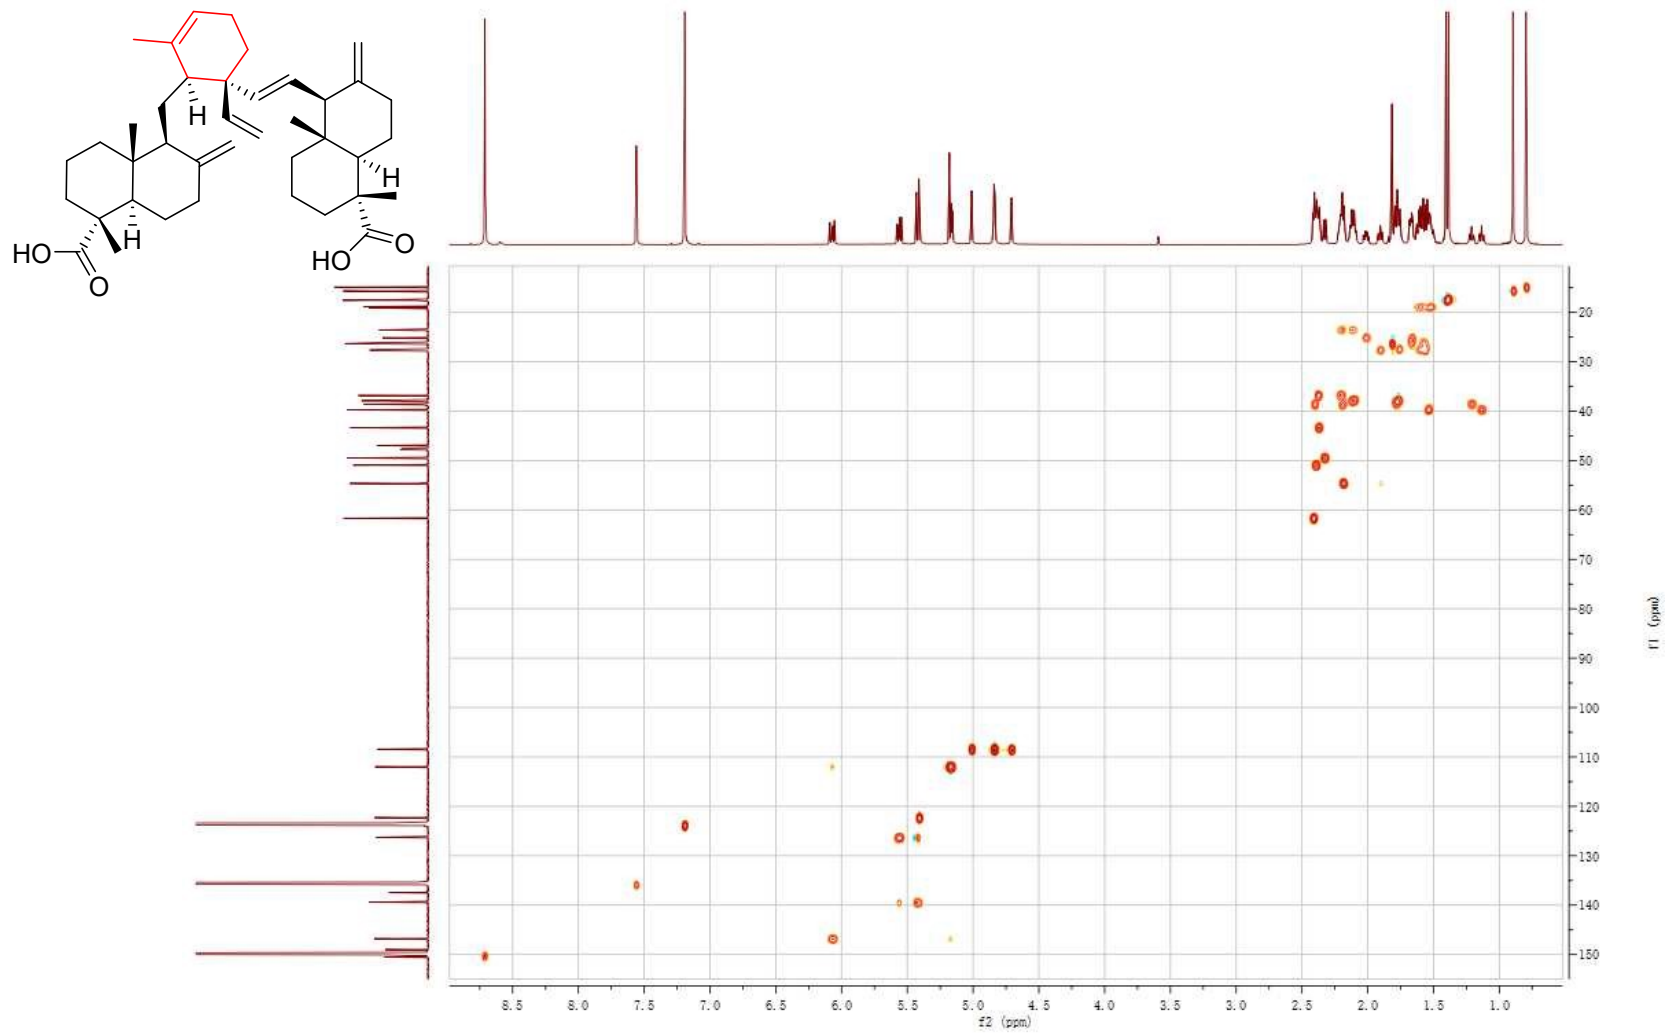

Figure S47. Expanded HSQC spectrum of cunlanceloic acid D (4).

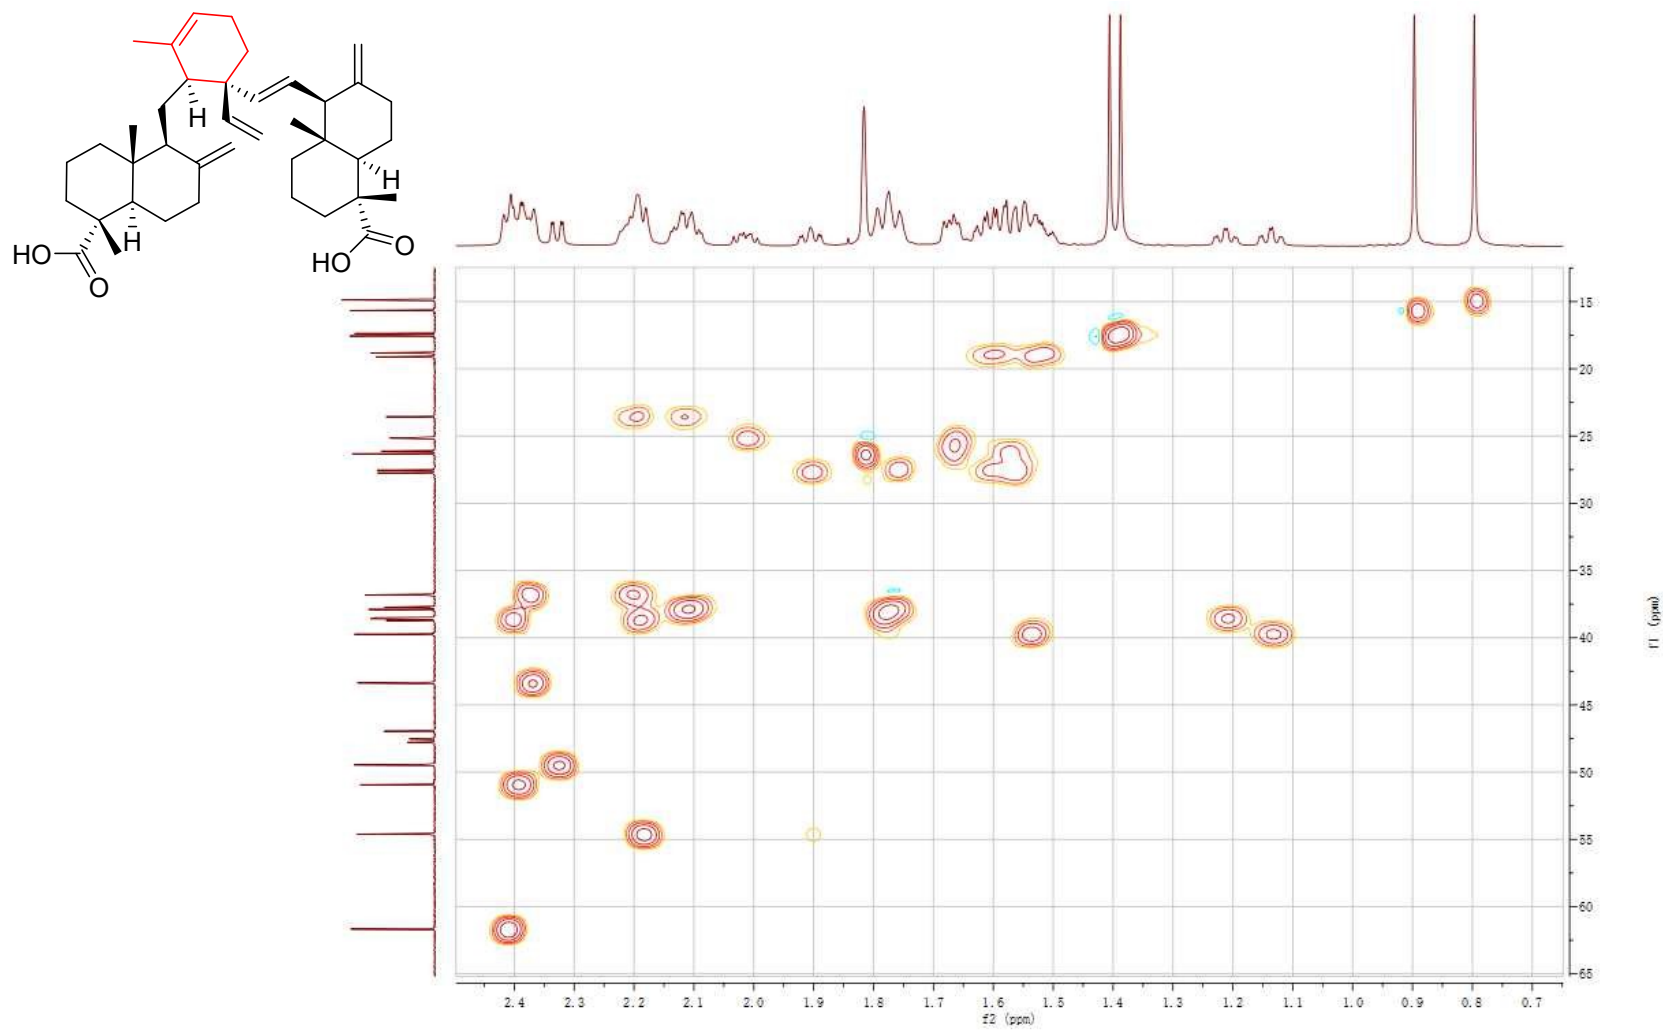

Figure S48.  $^1\text{H}$ - $^1\text{H}$  COSY spectrum of cunlanceloic acid D (4).

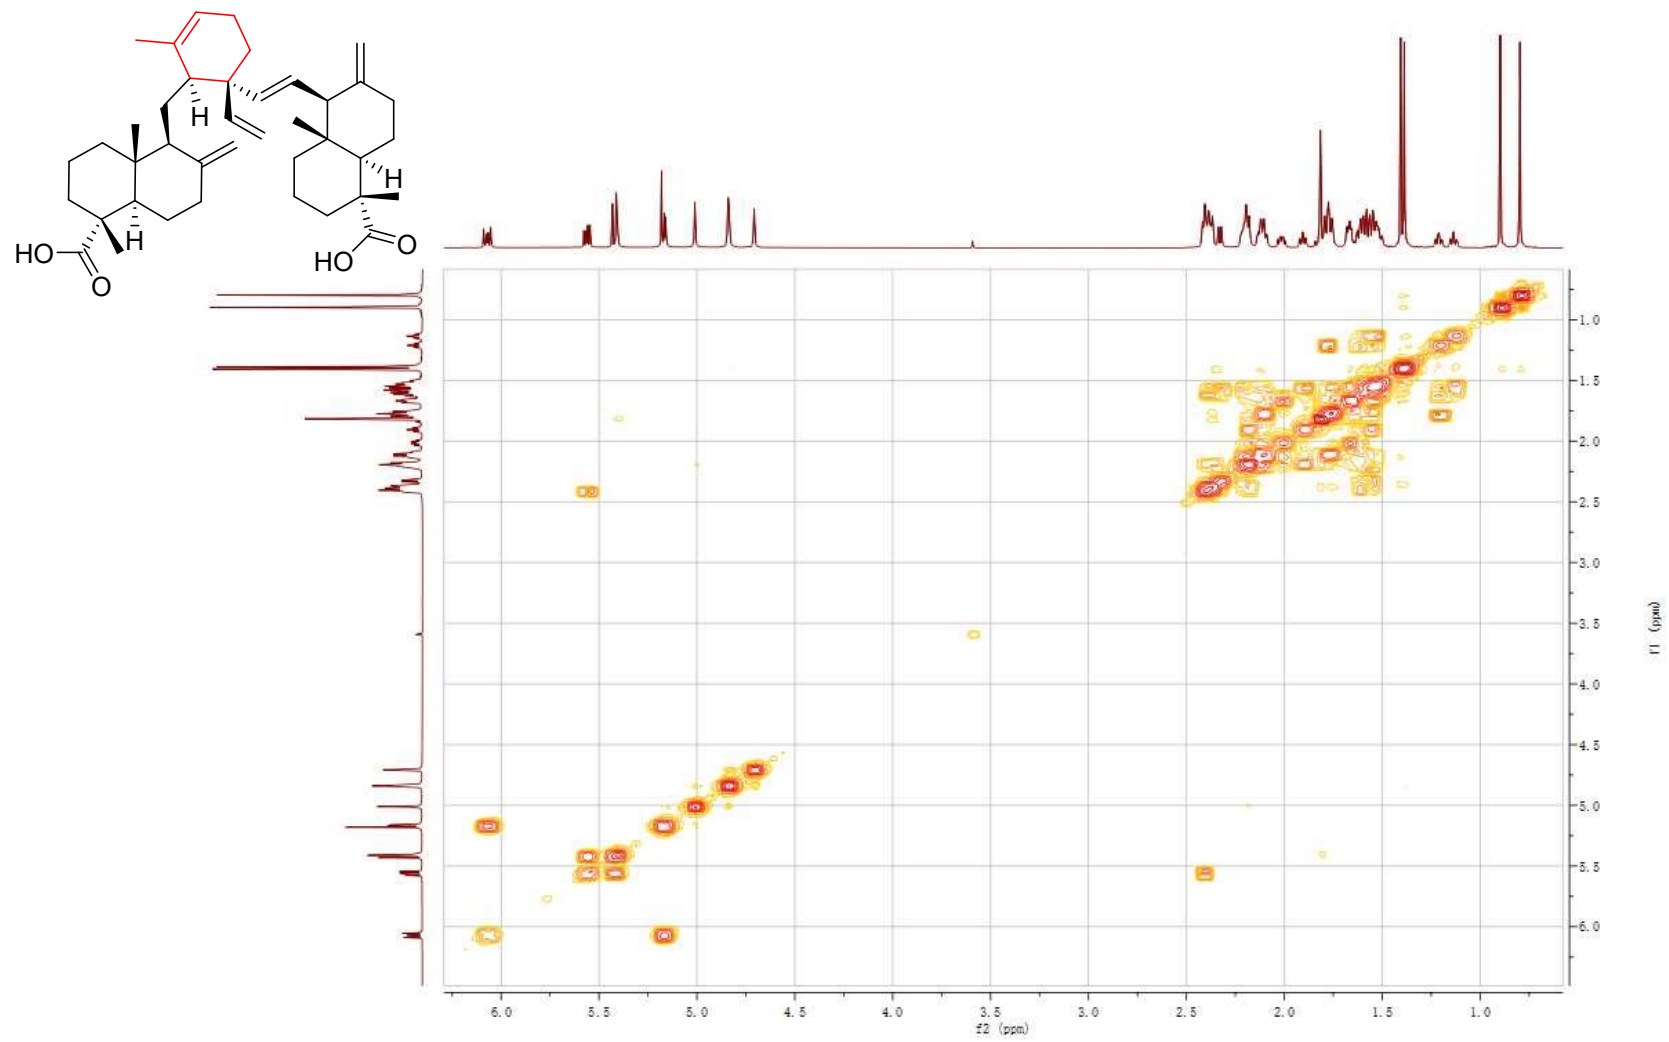

Figure S49. Expanded  $^1\text{H}$ - $^1\text{H}$  COSY spectrum of cunlanceloic acid D (4).

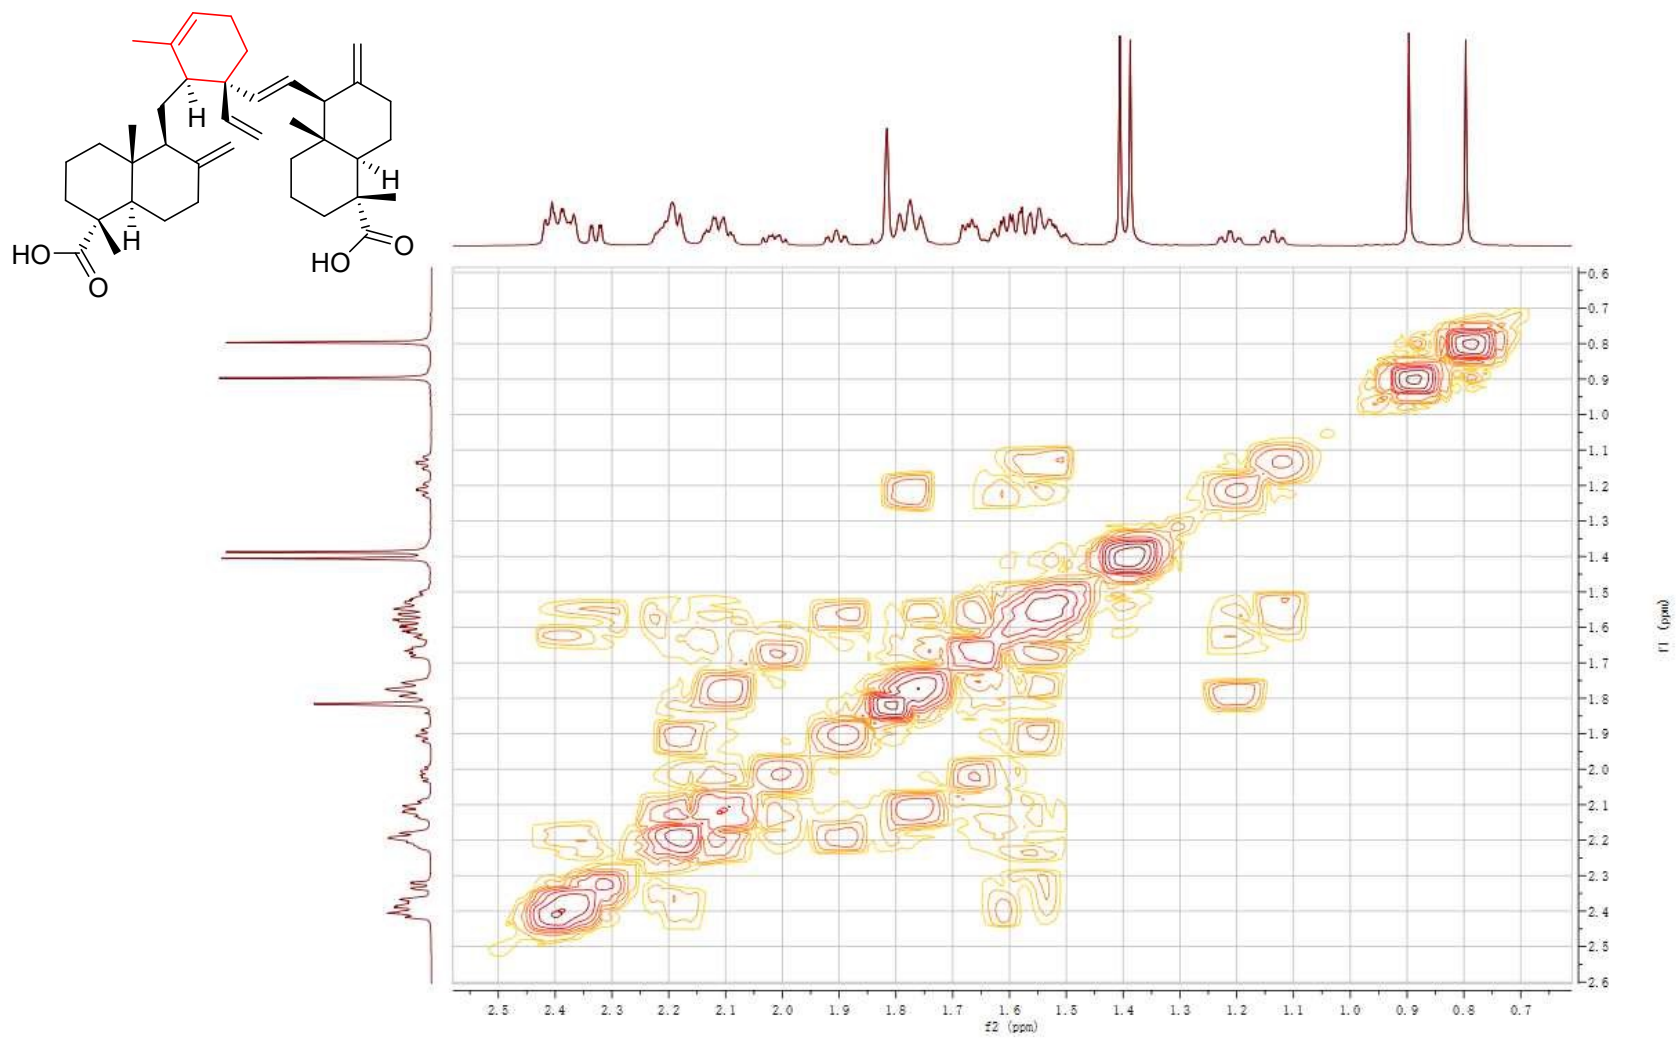



Figure S50. HMBC spectrum of cunlanceloic acid D (4).

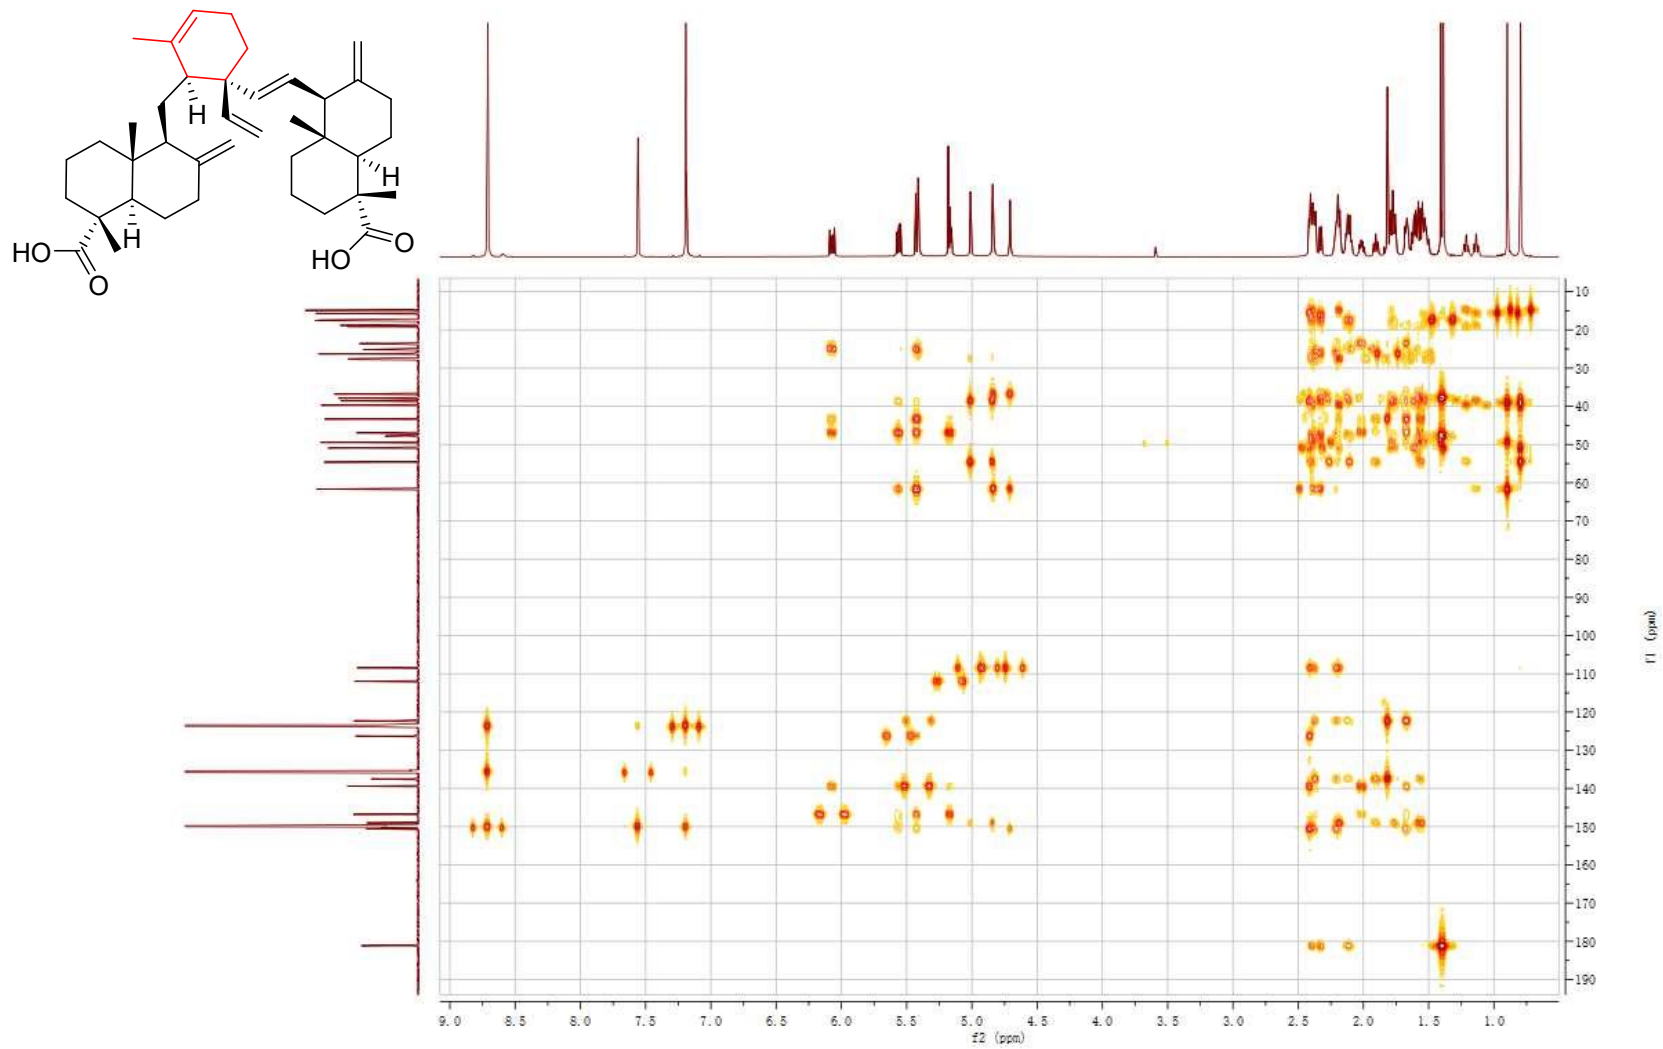

**Figure S51.** Expanded HMBC spectrum of cunlanceloic acid D (4).

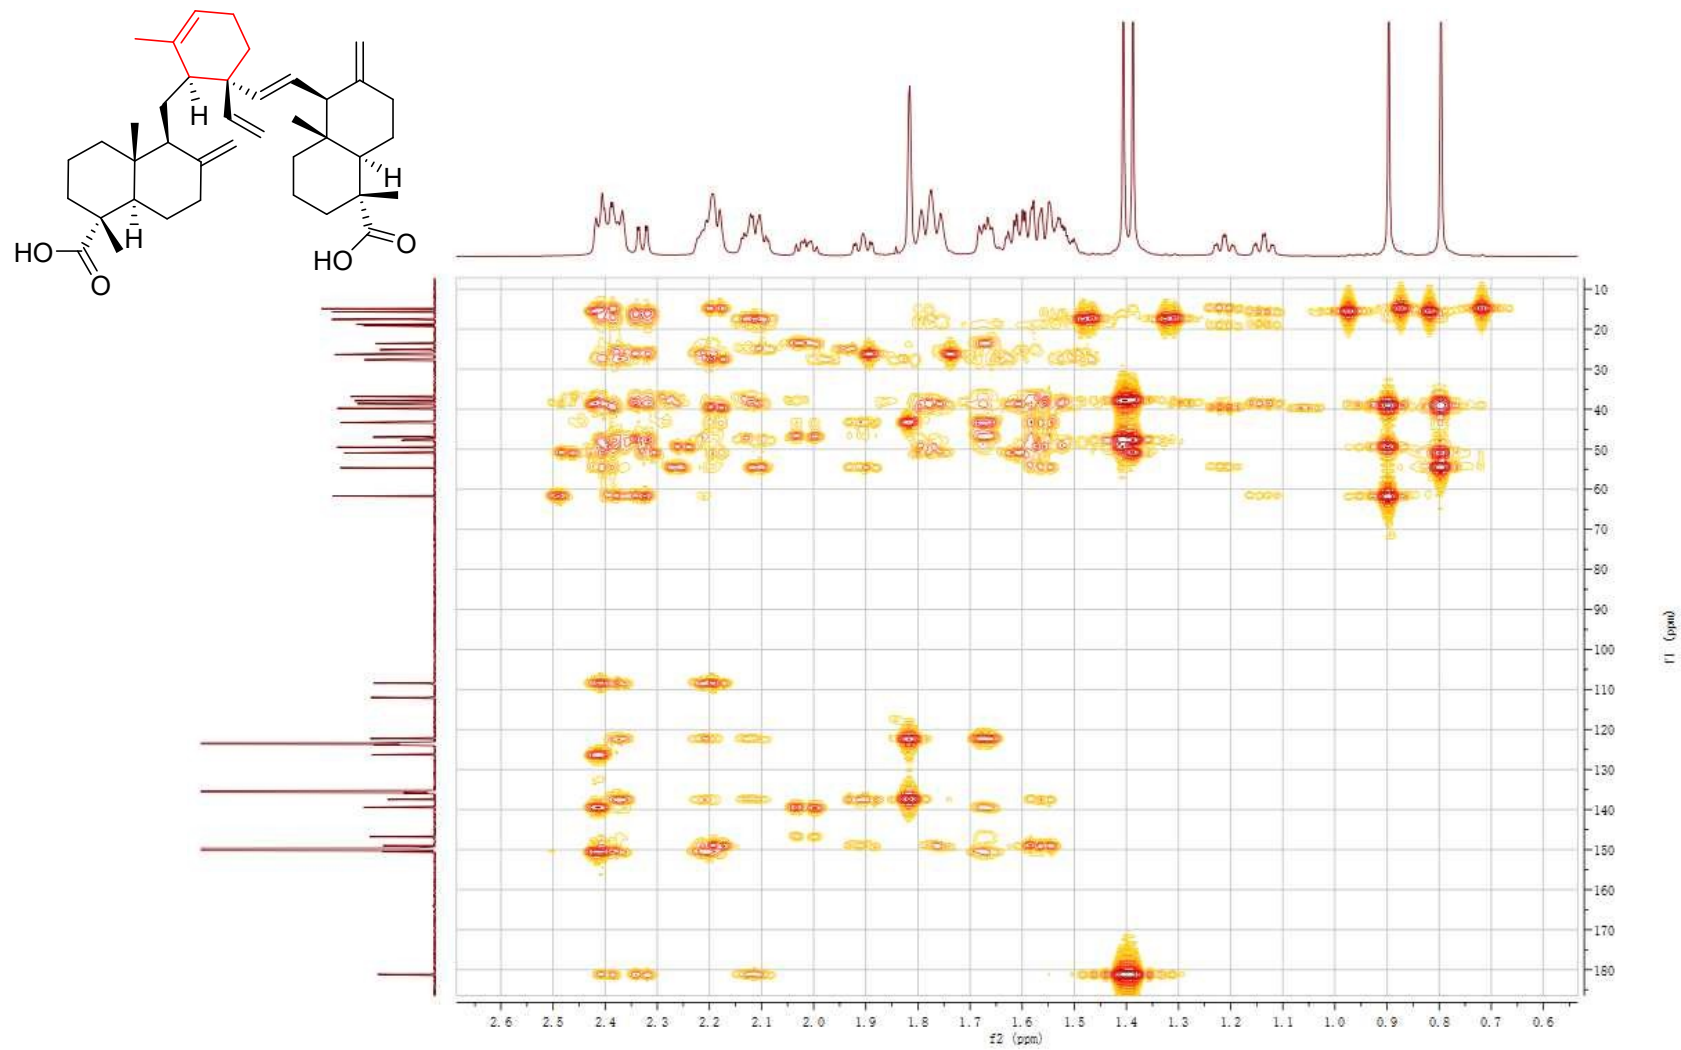

Figure S52. ROESY spectrum of cunlanceloic acid D (4).

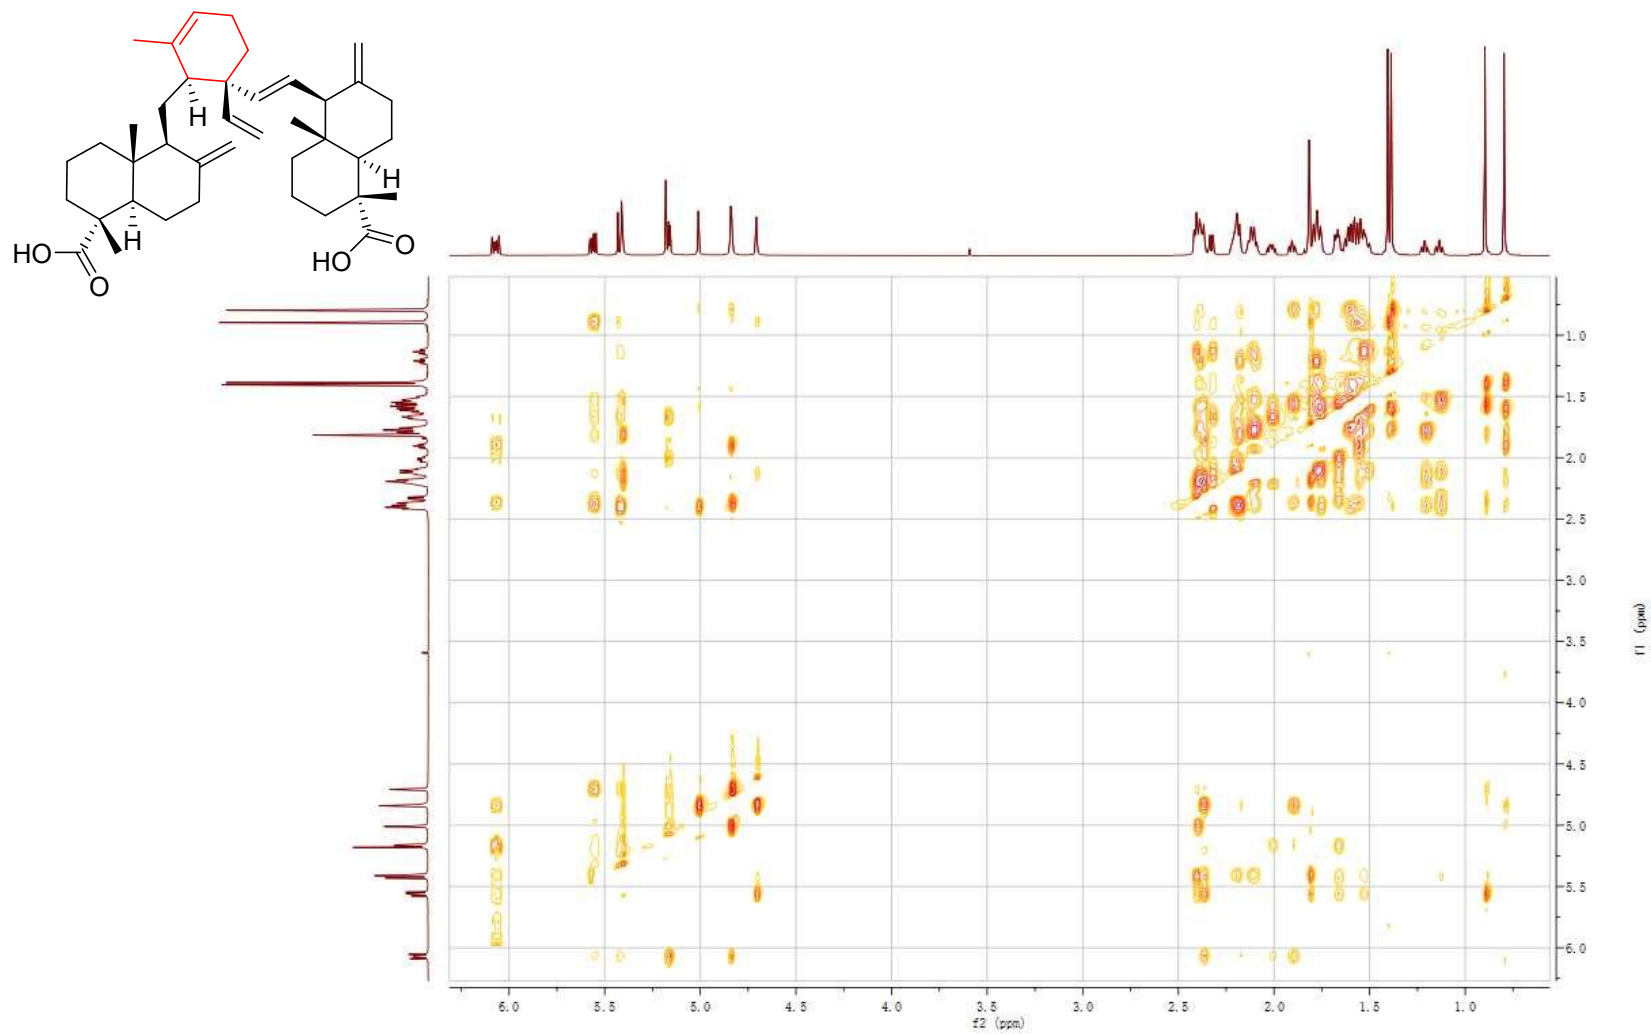

**Figure S53.** Expanded ROESY spectrum of cunlanceloic acid D (**4**).

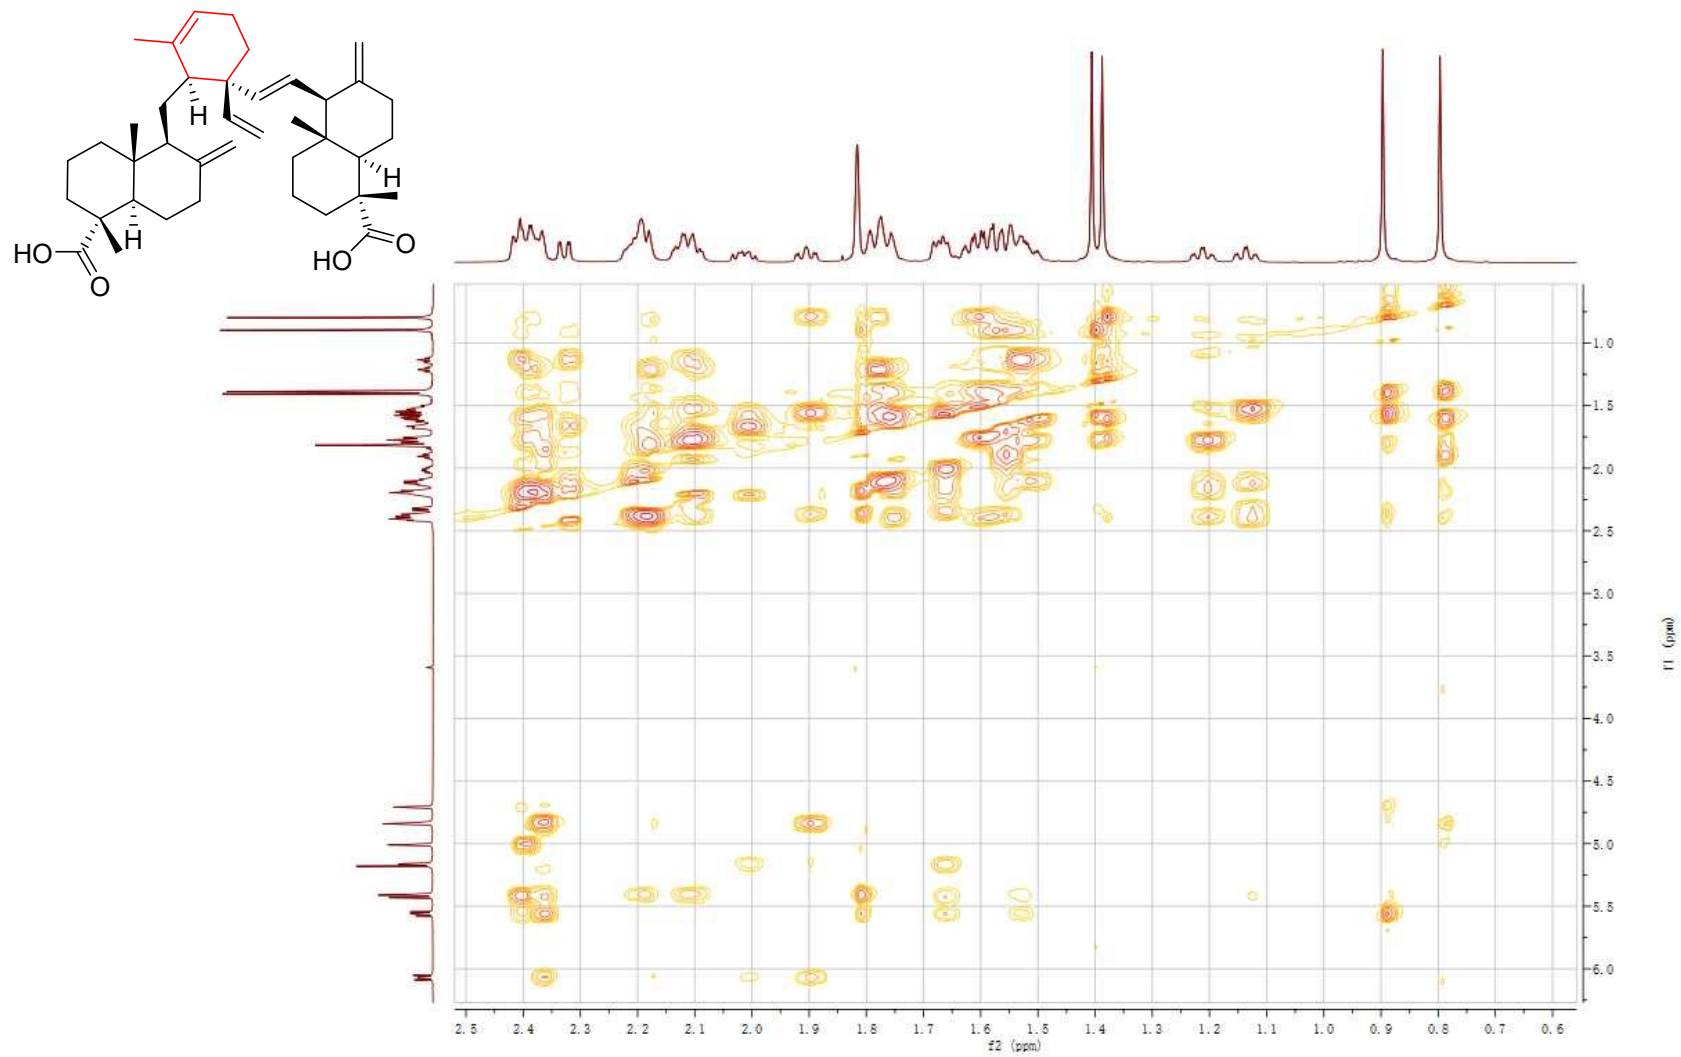

**Figure S54.** ESIMS spectrum of cunlanceloic acid D (4).

**<Spectrum>**

Retention Time:0.520(Scan#:81)

Spectrum:Averaged 0.373-0.680(58-104)

Background:Averaged 0.000-0.395(2-62) MS Stage:MS Polarity:Neg Segment1 - Event2 Precursor:----- Cutoff:

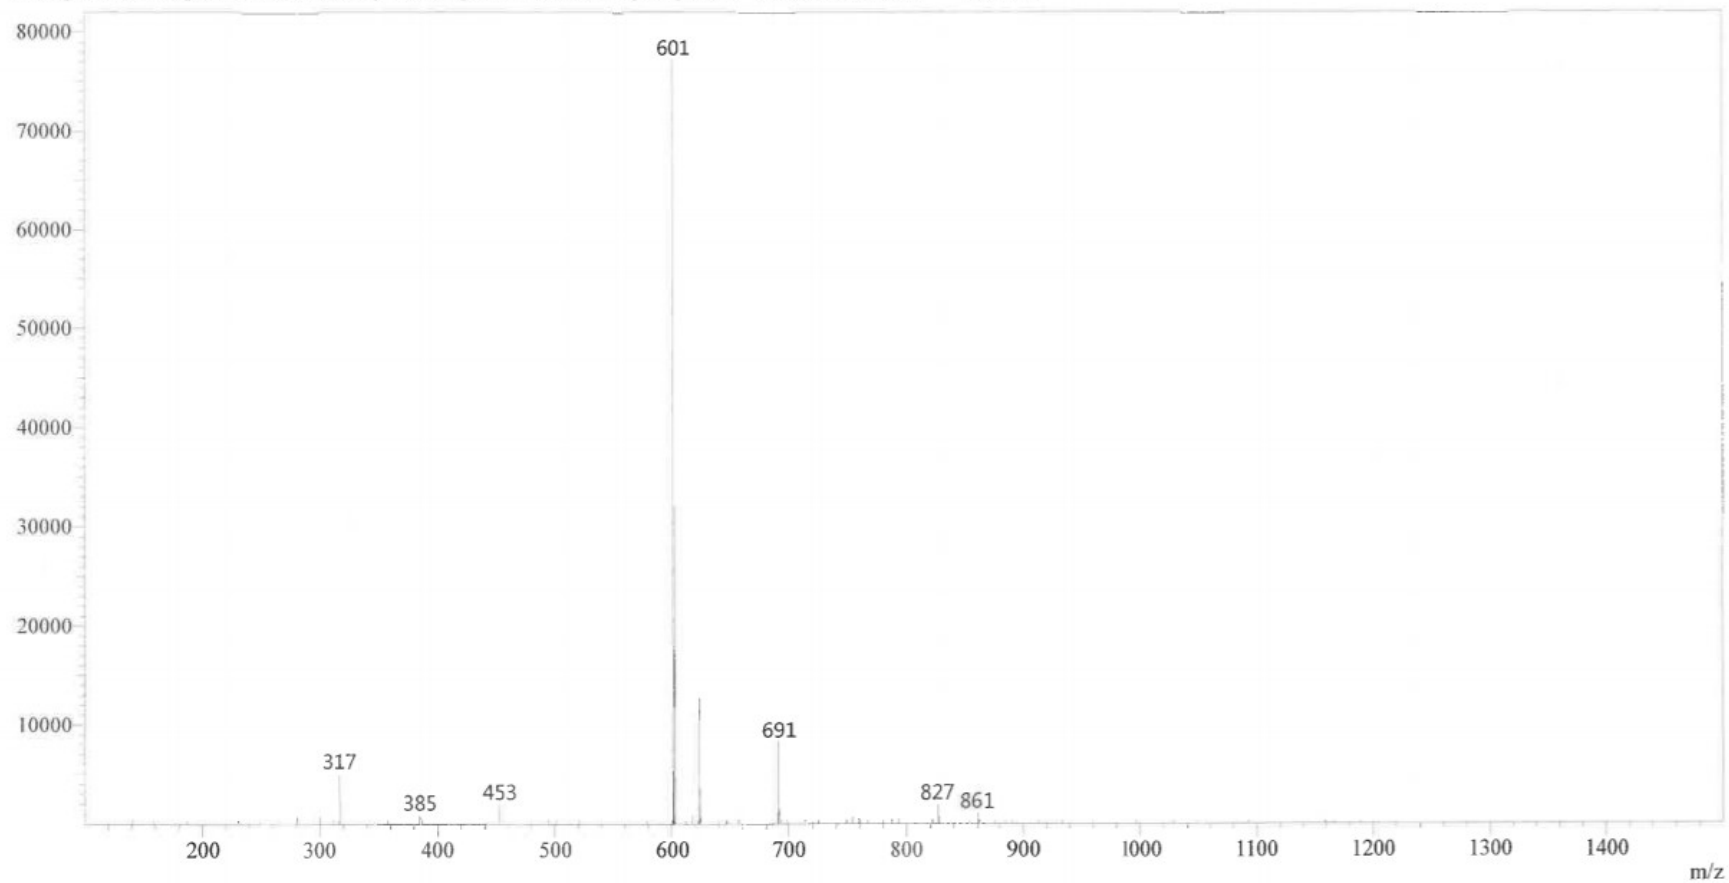

Data File: E:\DATA\2019\0924\1\FWF-197.lcd

| Elmt | Val. | Min | Max | Use Adduct |
|------|------|-----|-----|------|------|-----|-----|------|------|-----|-----|------|------|-----|-----|------------|
| H    | 1    | 2   | 100 | F    | 1    | 0   | 0   | S    | 2    | 0   | 0   | Pd   | 2    | 0   | 0   | H          |
| 2H   | 1    | 0   | 0   | Na   | 1    | 0   | 0   | Cl   | 1    | 0   | 0   | Ag   | 1    | 0   | 0   | HCOO       |
| C    | 4    | 10  | 50  | Mg   | 2    | 0   | 0   | Cu   | 2    | 0   | 0   | I    | 3    | 0   | 0   | Cl         |
| N    | 3    | 0   | 0   | Si   | 4    | 0   | 0   | Se   | 2    | 0   | 0   |      |      |     |     |            |
| O    | 2    | 0   | 30  | P    | 3    | 0   | 0   | Br   | 1    | 0   | 0   |      |      |     |     |            |

Figure S55. HRES

Error Margin (ppm): 5  
 HC Ratio: unlimited  
 Max Isotopes: all  
 MSn Iso RI (%): 75.00

DBE Range: -2.0 - 100.0  
 Apply N Rule: yes  
 Isotope RI (%): 1.00  
 MSn Logic Mode: OR

Electron Ions: both  
 Use MSn Info: yes  
 Isotope Res: 10000  
 Max Results: 10

Event#: 2 MS(E-) Ret. Time : 0.360->0.373 Scan#: 56->58

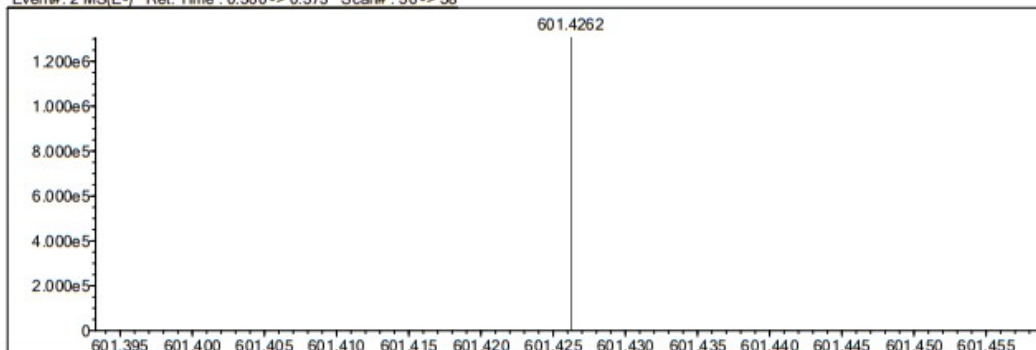

Measured region for 601.4262 m/z

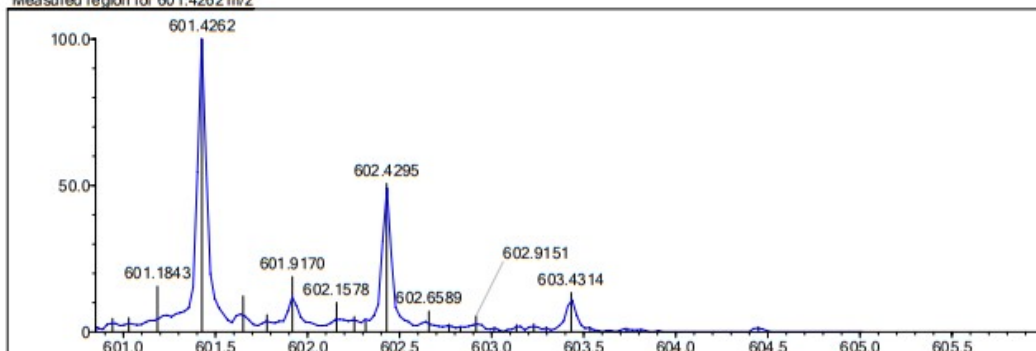

C40 H58 O4 [M-H]- : Predicted region for 601.4262 m/z

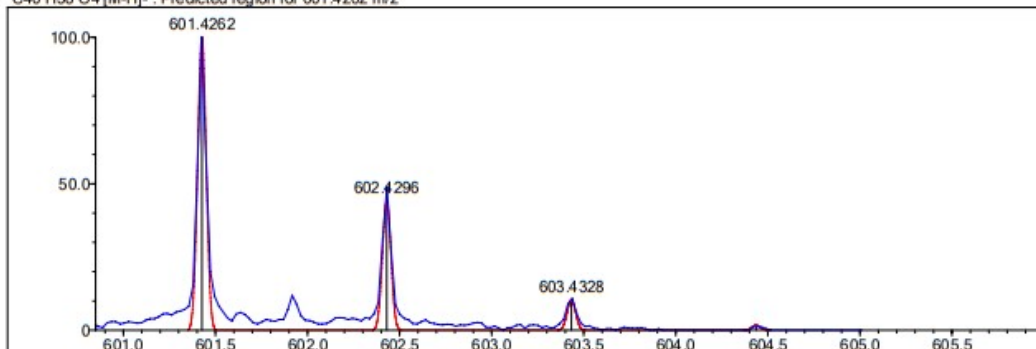

| Formula (M) | Ion    | Meas. m/z | Pred. m/z | Df. (mDa) | Df. (ppm) | DBE  |
|-------------|--------|-----------|-----------|-----------|-----------|------|
| C40 H58 O4  | [M-H]- | 601.4262  | 601.4262  | -0.0      | 0.00      | 12.0 |

Figure S56. IR spectrum of cunlanceloic acid D (4).

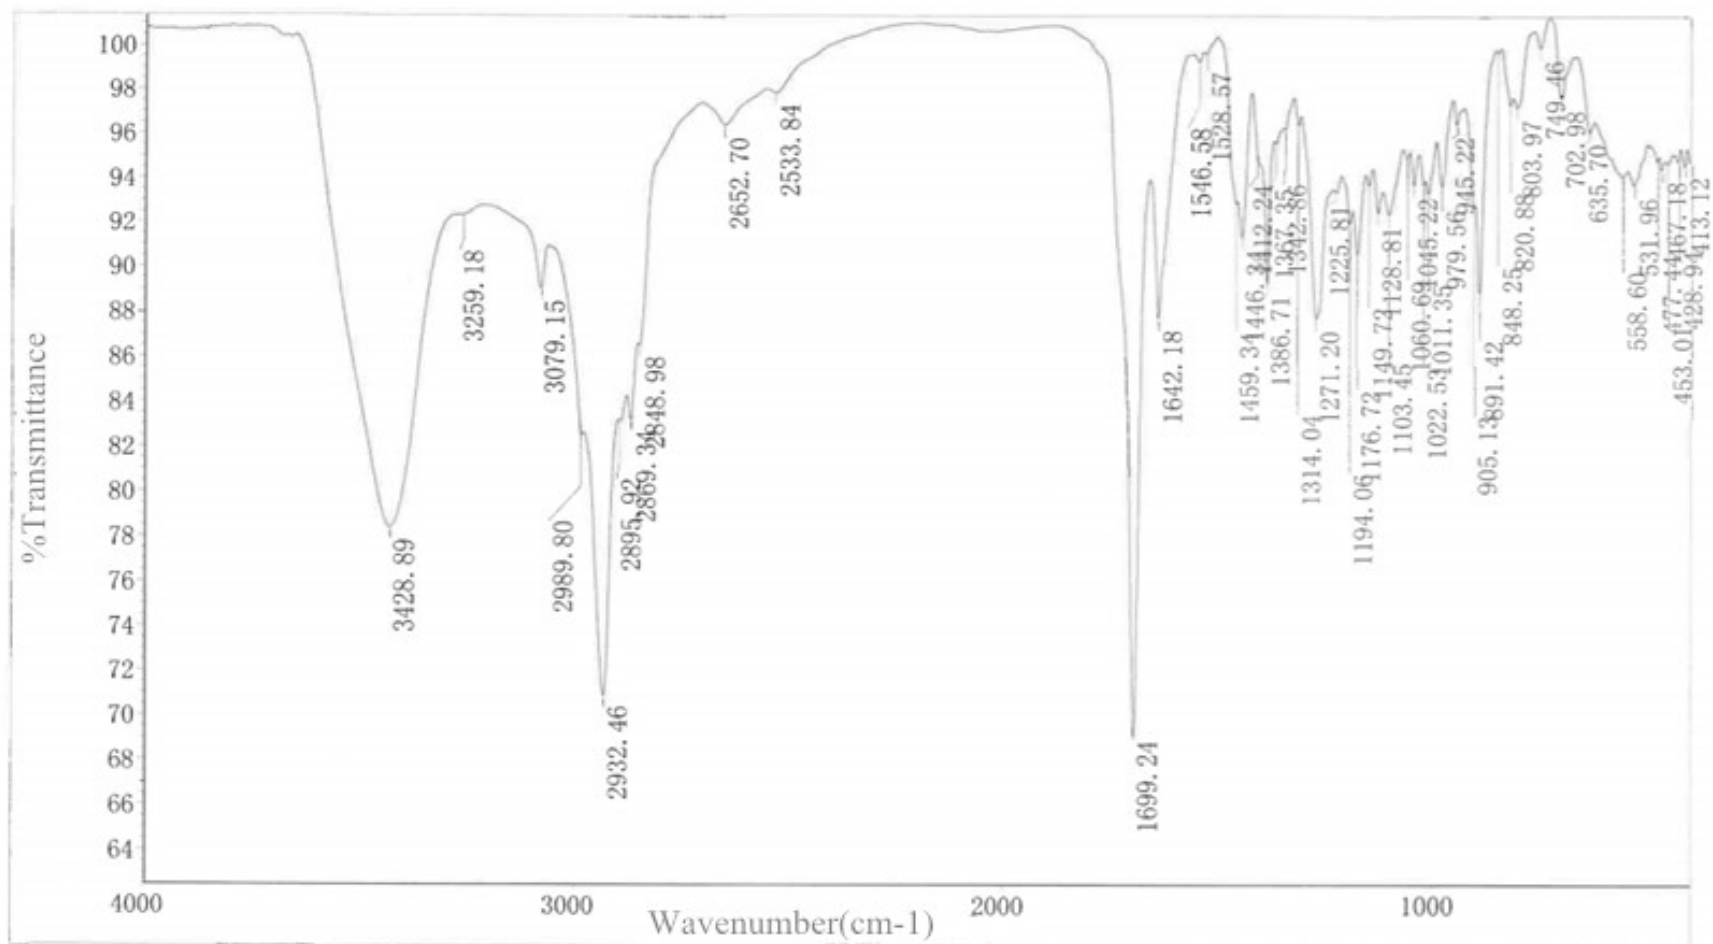

Supplement: d1qo00999k1.pdf [file d1qo00999k1.pdf]
